# Supplementary material
Source: PubMed Central journal article supplement (PMC4094251)

# Supporting Information

## Synthesis and Pharmacological Evaluation of DH $\beta$ E analogs as Neuronal Nicotinic Acetylcholine Receptor Antagonists

*Tue Heesgaard Jepsen, Anders A. Jensen, Mads Henrik Lund, Emil Glibstrup, Jesper Langgaard Kristensen\**

*Department of Drug Design and Pharmacology, School of Pharmaceutical Sciences, Faculty of Health and Medical Sciences, University of Copenhagen, Universitetsparken 2, DK-2100 Copenhagen, Denmark.*

jesper.kristensen@sund.ku.dk

### **Table of contents:**

- 1.1 Materials and methods
- 1.2 Experimental procedures and analytical data
- 1.3 Pharmacological data
- 1.4  $^1\text{H}$  and  $^{13}\text{C}$  NMR spectra

## 1.1. Material and methods

All reactions were carried out under nitrogen atmosphere with dry solvents under anhydrous conditions, unless otherwise noted. Dry THF, DMF, and  $\text{CH}_2\text{Cl}_2$  were obtained by passing commercially available pre-dried, oxygen-free formulations through activated alumina columns. Yields refer to chromatographically and spectroscopically ( $^1\text{H}$  and  $^{13}\text{C}$  NMR) homogeneous materials, unless otherwise stated. Reagents were purchased at the highest commercial quality and used without further purification, unless otherwise stated. Reactions were magnetically stirred and monitored by thin-layer chromatography (TLC) carried out on 0.25 mm E. Merck silica gel plates (60F-254) using UV light as visualizing agent, and either ninhydrine or potassium permanganate stain as an indicator. SiliCycle silica gel (60 Å, academic grade, particle size 40–63  $\mu\text{m}$ ) was used for flash column chromatography and SiliCycle silica gel (60 Å, academic grade, particle size 15–40  $\mu\text{m}$ ) was used for dry column vacuum chromatography.<sup>1</sup> NMR spectra were recorded on Bruker 400 and 600 MHz instruments and calibrated using residual undeuterated solvent as an internal reference. The following abbreviations were used to explain the multiplicities: s = singlet, d = doublet, t = triplet, br = broad, m = multiplet. Melting points (mp) were measured using a MPA100 Optimelt melting point apparatus and are uncorrected. Low-resolution mass spectra (LRMS) were obtained by either GCMS (Shimadzu GC-17A) or LCMS (Agilent 1100, Xbridge column, ESI mass detector). High-resolution mass spectra (HRMS) were obtained using a Micromass Q-TOF 2 instrument. **Abbreviations.** THF: tetrahydrofuran; DMF: *N,N*-dimethyl formamide; MeOH: methanol; EtOAc: ethyl acetate; AcOH: acetic acid, LAH: lithium aluminum hydride.

## 1.2. Experimental

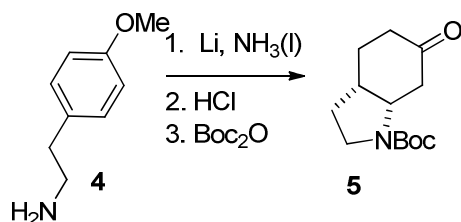

### **5: tert-butyl 6-oxooctahydro-1H-indole-1-carboxylate**

4-methoxy phenethylamine (**4**, 6.1 g, 40.5 mmol) was dissolved in absolute ethanol (50 ml) under  $\text{N}_2$  atm. and cooled to  $-50^\circ\text{C}$ . Liquid ammonia (60 ml) was lead through KOH-pellets and added to the system and lithium suspension in mineral oil (25%) was added carefully over 1h until a blue color persisted for more than 15 minutes. Then the cooling bath was removed and ammonia was evaporated overnight. The remaining mixture was concentrated *in vacuo* and water (100 ml) was added. The mixture was extracted with Ether (5x150 ml) and the combined organic layers were washed with brine, dried with  $\text{Na}_2\text{SO}_4$ , filtered and concentrated *in vacuo* to obtain a crude oil. The oil was dissolved in 5M hydrochloric acid (100 ml) and stirred at  $80^\circ\text{C}$  for 3 hours. The mixture was pH-adjusted with solid sodium hydroxide until a pH-value of 10 was reached. Then THF (75 ml) and  $\text{Boc}_2\text{O}$  (8.84g, 40.5 mmol) was added and the mixture was stirred at rt overnight. THF was evaporated and the mixture was extracted with ethyl acetate (4x100 ml). The combined organic layers were washed with brine (40 ml), dried with  $\text{Na}_2\text{SO}_4$ , filtered, evaporated onto celite and purified by dry column vacuum chromatography (Heptane->EtOAc, 10%) to obtain **5** as a yellow oil (6.0 g, 25.1 mmol, 62% yield over 3 steps).

$R_f$  = 0.58 (silica gel, MeOH/EtOAc/heptanes, 10:45:45);  $^1\text{H}$  NMR (400 MHz,  $\text{CDCl}_3$ )  $\delta$  ppm 3.97 - 4.21 (m, 1 H), 3.34 - 3.56 (m, 2 H), 2.70 - 2.90 (m, 1 H), 2.47 - 2.59 (m, 1 H), 2.30 - 2.45 (m, 2 H), 2.15 - 2.26 (m, 1 H), 1.98 - 2.12 (m, 2 H), 1.76 - 1.93 (m, 2 H), 1.38 - 1.54 (m, 9 H);  $^{13}\text{C}$  NMR (101 MHz,  $\text{CDCl}_3$ )  $\delta$  ppm

210.7, 154.2, 79.7, 56.2, 53.4, 45.4, 40.7, 37.0, 32.5, 28.5, 24.8; LRMS (GCMS) calcd for  $C_{13}H_{21}NO_3 + [M^+]$  239.1521 found 239.

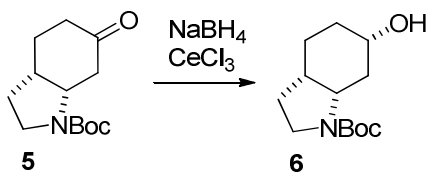

**6: tert-butyl 6-hydroxyoctahydro-1H-indole-1-carboxylate**

**5** (6.0 g, 25.1 mmol, 1 eq) was dissolved in MeOH (100 ml) under  $N_2$  atm. and  $CeCl_3$  (0.927 g, 3.76 mmol, 0.15 eq) was added to the solution. Then the mixture was cooled to  $-30^\circ C$  and  $NaBH_4$  (2.847 g, 75.21 mmol, 3 eq) was added slowly over 15 minutes and the mixture was stirred for additional 2h at  $-30^\circ C$ . MeOH was evaporated, brine (100 ml) was added, and the mixture was extracted with EtOAc (4x125ml). The combined organic layers were washed with water (50 ml), dried with  $Na_2SO_4$ , filtered, evaporated onto celite and purified by dry column vacuum chromatography (Heptane->EtOAc, 10%) to obtain **6** as a white solid (5.4 g, 22.3 mmol, 89 %).

$R_f = 0.19$  (silica gel, heptanes/EtOAc, 1:1); Mp =  $97.1 - 98.2^\circ C$ ;  $^1H$  NMR (400 MHz,  $CDCl_3$ )  $\delta$  ppm 3.71 - 3.91 (m, 1 H), 3.50 - 3.62 (m, 1 H), 3.40 - 3.49 (m, 1 H), 3.25 - 3.37 (m, 1 H), 2.13 - 2.38 (m, 2 H), 1.85 - 1.99 (m, 1 H), 1.62 - 1.84 (m, 5 H), 1.41 - 1.49 (m, 9 H), 1.27 - 1.41 (m, 1 H), 1.09 - 1.24 (m, 1 H);  $^{13}C$  NMR (101 MHz,  $CDCl_3$ )  $\delta$  ppm 154.1, 79.0, 68.7, 56.0, 45.0, 37.1, 36.3, 29.8, 28.5, 26.1, 23.4; LRMS (GCMS) calcd for  $C_{13}H_{23}NO_3 + [M^+]$  241.1658 found 241.

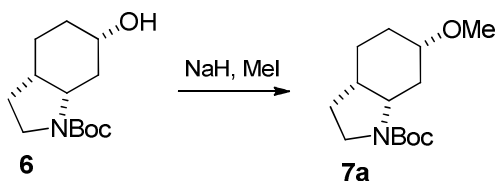

**7a: tert-butyl 6-methoxyoctahydro-1H-indole-1-carboxylate**

**6** (1.87 g, 7.75mmol, 1 eq) was dissolved in dry DMF (30 ml) under  $N_2$  atm. The mixture was cooled to  $0^\circ C$  and NaH in a 60% suspension (0.787 g, 19.38 mmol, 2.5 eq) was added slowly. The mixture was stirred at  $0^\circ C$  for 30 min. The ice-bath was removed and methyl iodide (2.0 ml, 32.13 mmol, 4.1 eq) was added. The mixture was stirred at rt for 12 hours. TLC showed full conversion of starting material. Brine (50 ml) was added and the mixture was extracted with ethyl acetate (3x100 ml). The combined organic layers were dried with  $Na_2SO_4$ , washed with water (70 ml), filtered, evaporated *in vacuo* on celite and purified by column chromatography (EtOAc:Heptane 1:1) to obtain **7a** as a colorless oil (1.80 g, 7.05 mmol, 91%).

$R_f = 0.54$  (silica gel, heptanes/EtOAc, 1:1);  $^1H$  NMR (400 MHz,  $CDCl_3$ )  $\delta$  ppm 3.64 - 3.93 (m, 1 H), 3.37 - 3.51 (m, 1 H), 3.21 - 3.37 (m, 4 H), 2.99 - 3.11 (m, 1 H), 2.11 - 2.55 (m, 2 H), 1.76 - 1.99 (m, 3 H), 1.57 - 1.75 (m, 2 H), 1.45 (s, 9 H), 1.21 - 1.36 (m, 1 H), 0.95 - 1.13 (m, 1 H);  $^{13}C$  NMR (101 MHz,  $CDCl_3$ )  $\delta$  ppm 154.1, 78.9, 77.4, 55.6, 44.9, 36.8, 33.8, 32.8, 28.5, 26.9, 26.1, 23.4; LRMS (GCMS) calcd for  $C_{14}H_{25}NO_3 + [M^+]$  255.1834 found 255.

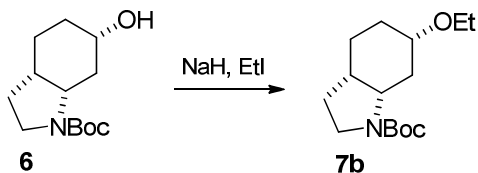

**7b: tert-butyl 6-ethoxyoctahydro-1H-indole-1-carboxylate**

**6** (201.1 mg, 0.833 mmol, 1 eq) was dissolved in dry DMF (5 ml) under  $N_2$  atm. The mixture was cooled to  $0^\circ C$  and NaH in a 60% suspension (73.5 mg, 1.838 mmol, 2.2 eq) was added slowly. The mixture was stirred

at 0 °C for 30 min. The ice-bath was removed and ethyl iodide (0.36 ml, 2.49 mmol, 3 eq) was added. The mixture was stirred at rt overnight. TLC showed almost full conversion of starting material. Brine was added (20 ml) and the mixture was extracted with ethyl acetate (4x20 ml). The combined organic layers were washed with water (40 ml), dried with Na<sub>2</sub>SO<sub>4</sub>, filtered, evaporated *in vacuo* on celite and purified by column chromatography (Heptane→EtOAc, 5 % grad) to obtain **7b** as a colorless oil (138 mg, 0.510 mmol, 61 %).

$R_f$  = 0.69 (silica gel, heptanes/EtOAc, 1:1); <sup>1</sup>H NMR (400 MHz, CDCl<sub>3</sub>) δ ppm 3.67 - 3.90 (m, 1 H), 3.09 - 3.21 (m, 1 H), 3.21 - 3.61 (m, 4 H), 2.26 - 2.52 (m, 1 H), 2.10 - 2.26 (m, 1 H), 1.75 - 2.01 (m, 3 H), 1.57 - 1.74 (m, 2 H), 1.45 (s, 9 H), 1.26 - 1.38 (m, 1 H), 1.13 - 1.23 (m, 3 H), 1.00 - 1.12 (m, 1 H); <sup>13</sup>C NMR (101 MHz, CDCl<sub>3</sub>) δ ppm 154.1, 78.9, 75.8, 63.2, 56.2, 44.8, 36.8, 34.3, 28.5, 26.9, 25.9, 23.5, 15.6; LRMS (GCMS) calcd for C<sub>15</sub>H<sub>27</sub>NO<sub>3</sub>+ [M<sup>+</sup>] 269.1991 found 269.

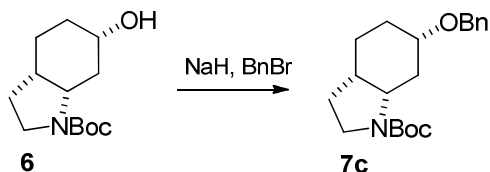

#### **7c: tert-butyl 6-(benzyloxy)octahydro-1H-indole-1-carboxylate**

**6** (200 mg, 0.829 mmol, 1 eq) was dissolved in dry DMF (9 ml) under N<sub>2</sub> atm. The mixture was cooled to 0 °C and NaH in a 60% suspension (83 mg, 2.07 mmol, 2.5 eq) was added slowly. The mixture was stirred at 0 °C for 30 min. The ice-bath was removed and benzyl bromide (425 mg, 2.49 mmol, 3.0 eq) was added. The mixture was stirred at rt overnight. TLC showed full conversion of starting material. Brine (20 ml) was added and the mixture was extracted with ethyl acetate (4x20 ml). The combined organic layers were washed with water (40 ml), dried with Na<sub>2</sub>SO<sub>4</sub>, filtered, evaporated *in vacuo* on celite and purified by column chromatography (EtOAc:Heptane 1:1) to obtain **7c** as a colorless oil (252 mg, 0.760 mmol, 92 %).

$R_f$  = 0.70 (silica gel, heptanes/EtOAc, 1:1); <sup>1</sup>H NMR (400 MHz, CDCl<sub>3</sub>) δ ppm 7.22 - 7.42 (m, 5 H), 4.45 - 4.67 (m, 2 H), 3.68 - 3.94 (m, 1 H), 3.39 - 3.54 (m, 1 H), 3.22 - 3.38 (m, 2 H), 2.30 - 2.63 (m, 1 H), 2.12 - 2.28 (m, 1 H), 1.77 - 2.06 (m, 3 H), 1.57 - 1.77 (m, 2 H), 1.33 - 1.54 (m, 10 H), 1.10 - 1.30 (m, 1 H); <sup>13</sup>C NMR (101 MHz, CDCl<sub>3</sub>) δ ppm 154.1, 138.8, 128.3, 127.5, 126.9, 78.9, 75.6, 69.9, 56.1, 44.8, 36.8, 34.1, 28.5, 26.9, 25.9, 23.4; LRMS (GCMS) calcd for C<sub>20</sub>H<sub>29</sub>NO<sub>3</sub>+ [M<sup>+</sup>] 331.2147 found 331.

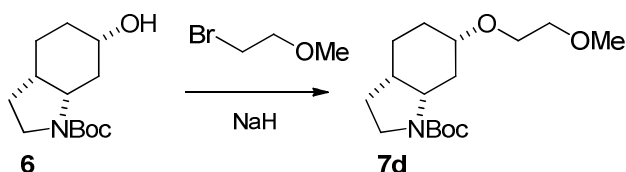

#### **7d: tert-butyl 6-(2-methoxyethoxy)octahydro-1H-indole-1-carboxylate**

**6** (498 mg, 2.07 mmol, 1 eq) was dissolved in dry DMF (9 ml) under N<sub>2</sub> atm. The mixture was cooled to 0 °C and NaH in a 60% suspension (210 mg, 5.26 mmol, 2.5 eq) was added slowly. The mixture was stirred at 0 °C for 30 min. The ice-bath was removed and methoxy ethyl bromide (0.60 ml, 6.39 mmol, 3.1 eq) was added. The mixture was stirred at rt overnight. Brine was added (20 ml) and the mixture was extracted with ethyl acetate (4x20 ml). The combined organic layers were washed with water (40 ml), dried with Na<sub>2</sub>SO<sub>4</sub>, filtered, evaporated *in vacuo* on celite and purified by column chromatography (EtOAc:Heptane 1:1) to obtain **7d** as a colorless oil (254 mg, 0.850 mmol, 41 %).

$R_f$  = 0.34 (silica gel, heptanes/EtOAc, 1:1); <sup>1</sup>H NMR (400 MHz, CDCl<sub>3</sub>) δ ppm 3.69 - 3.90 (m, 1 H), 3.41 - 3.69 (m, 5 H), 3.38 (m, 3 H), 3.25 - 3.35 (m, 1 H), 3.20 (m, 1 H), 2.29 - 2.55 (m, 1 H), 2.11 - 2.27 (m, 1 H), 1.75 - 2.01 (m, 3 H), 1.57 - 1.75 (m, 2 H), 1.45 (s, 9 H), 1.23 - 1.41 (m, 1 H), 1.12 (m, 1 H); <sup>13</sup>C NMR (101 MHz, CDCl<sub>3</sub>) δ ppm 154.0, 79.0, 76.6, 72.3, 67.2, 59.1, 56.1, 44.8, 36.8, 34.1, 28.6, 26.5, 25.9, 23.4; LRMS (GCMS) calcd for C<sub>16</sub>H<sub>29</sub>NO<sub>4</sub>+ [M<sup>+</sup>] 299.2097 found 299.

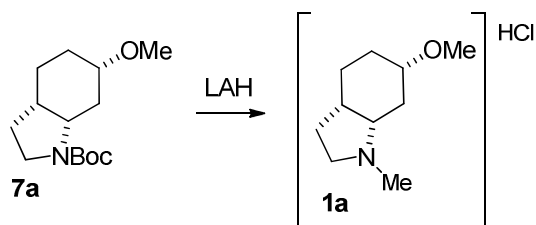

**1a: 6-methoxy-1-methyloctahydro-1H-indole, HCl**

**7a** (500 mg, 1.96 mmol, 1 eq) was dissolved in dry THF (10 ml) and added LiAlH<sub>4</sub> (223 mg, 5.88 mmol, 3 eq). Then refluxed for 3 h for full conversion of starting material and quenched by adding ether (10 ml), and dropwise addition of water (225  $\mu$ l), 15 % NaOH solution (225  $\mu$ l) and H<sub>2</sub>O (450  $\mu$ l) under vigorous stirring for 30 min and dried with magnesium sulfate. The mixture was filtered and added 2M HCl in Ether (5 ml) dropwise whereby a precipitate was formed at the bottom of the flask. The supernatant was removed and the remains were evaporated to dryness to provide the title compound as a white solid (371mg, 1.80 mmol, 92%). (Note that the diastereomerically pure compound appears as a mixture of diastereoisomers in the NMR spectra due to the two possible orientations of the protonated amine).

R<sub>f</sub> (free amine) = 0.45 (silica gel, EtOAc/MeOH/TEA, 45:45:10); <sup>1</sup>H NMR (400 MHz, DMSO-*d*<sub>6</sub>)  $\delta$  11.63 (br s, 1 H), 9.57 (br s, 1 H), 3.85- 4.02 (m, 2H), 3.75 (m, 1H), 3.54 (m, 1H), 3.49 – 3.38 (m, 2H), 3.32 (m, 1H), 3.28 (s, 3H), 3.24 (s, 3H), 3.19 – 3.07 (m, 2H), 2.99 (m, 1H), 2.79 (d, *J* = 5.1 Hz, 2H), 2.60 (d, *J* = 5.1 Hz, 2H), 2.46 (m, 1H), 2.14 – 1.49 (m, 15 H), 1.31 – 1.16 (m, 2H); <sup>13</sup>C NMR (101 MHz, DMSO)  $\delta$  76.9, 74.6, 66.4, 62.1, 55.9, 55.7, 54.6, 51.0, 35.8, 35.2, 35.1, 28.5, 27.2, 26.3, 25.8, 25.6, 24.7, 22.4, 22.1; HRMS calcd for C<sub>10</sub>H<sub>20</sub>NO<sup>+</sup> [M<sup>+</sup>] 170.1545 found 170.1533.

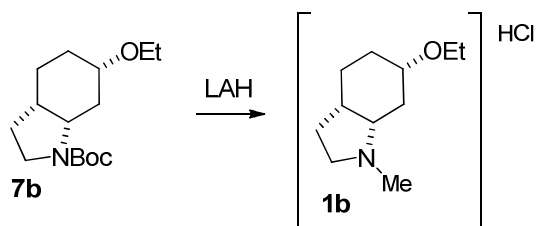

**1b: 6-ethoxy-1-methyloctahydro-1H-indol, HCl**

**7b** (52 mg, 0.19 mmol, 1 eq) was dissolved in dry THF (5 ml) under N<sub>2</sub> atm. LAH (22 mg, 0.58 mmol, 3 eq) was added and the mixture was refluxed for 3 h. TLC showed full conversion of starting material. The reaction was quenched by adding ether (5 ml), and dropwise addition of water (22  $\mu$ l), 15 % NaOH solution (22  $\mu$ l) and H<sub>2</sub>O (44  $\mu$ l) under vigorous stirring for 30 min and dried with magnesium sulfate. The mixture was filtered and added 2M HCl in Ether (1 ml) dropwise whereby a colorless oil was formed at the bottom of the flask. The supernatant was removed and the remaining viscous oil evaporated to dryness. **1b** was isolated as a yellow oil (41 mg, 0.19 mmol, 96 %). (Note that the diastereomerically pure compound appears as a mixture of diastereoisomers in the NMR spectra due to the two possible orientations of the protonated amine).

R<sub>f</sub> (free amine) = 0.53 (silica gel, EtOAc/MeOH/TEA, 45:45:10); <sup>1</sup>H NMR (400 MHz, DMSO-*d*<sub>6</sub>)  $\delta$  ppm 11.44 (br s, 1 H), 9.61 (br s, 1 H), 3.66 - 3.82 (m, 2 H), 3.18 - 3.60 (m, 8 H), 2.92 - 3.17 (m, 2 H), 2.56 - 2.82 (m, 6 H), 2.40 - 2.49 (m, 2 H), 1.88 - 2.16 (m, 4 H), 1.45 - 1.88 (m, 10 H), 1.17 - 1.33 (m, 2 H), 1.03 - 1.16 (m, 6 H); <sup>13</sup>C NMR (101 MHz, DMSO-*d*<sub>6</sub>)  $\delta$  ppm 74.7, 72.6, 66.1, 62.8, 62.5, 61.7, 54.1, 50.6, 40.5, 35.3, 34.6, 34.4, 28.8, 26.4, 26.3, 26.0, 25.6, 24.2, 22.0, 21.8, 15.5, 15.3; HRMS calcd for C<sub>11</sub>H<sub>22</sub>NO<sup>+</sup> [M<sup>+</sup>] 184.1701 found 184.1716.

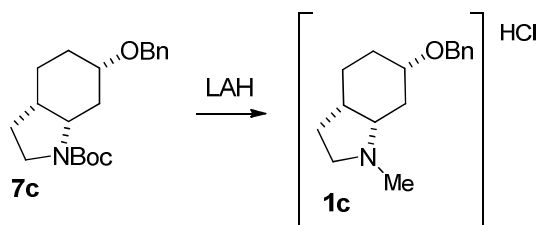

**1c: 6-(benzyloxy)-1-methyloctahydro-1H-indol, HCl**

**7c** (130 mg, 0.392 mmol, 1 eq) was dissolved in dry THF (8 ml) under N<sub>2</sub> atm. LAH (45 mg, 1.18 mmol, 3 eq) was added and the mixture was refluxed for 3 h. TLC showed full conversion of starting material. The reaction was quenched by adding ether (5 ml), and dropwise addition of water (45 μl), 15 % NaOH solution (45 μl) and H<sub>2</sub>O (90 μl) under vigorous stirring for 30 min and dried with magnesium sulfate. The mixture was filtered and added 2M HCl in Ether (1 ml) dropwise where by a colorless oil was formed at the bottom of the flask. The supernatant was removed and the remaining viscous oil evaporated to dryness. The title compound was isolated as a yellow oil (108 mg, 0.38 mmol, 98 %). (Note that the diastereomerically pure compound appears as a mixture of diastereoisomers in the NMR spectra due to the two possible orientations of the protonated amine).

R<sub>f</sub> (free amine) = 0.57 (silica gel, EtOAc/MeOH/TEA, 45:45:10); <sup>1</sup>H NMR (400 MHz, DMSO-*d*<sub>6</sub>) δ ppm 11.56 (br s, 1 H), 9.87 (br s, 1 H), 7.21 - 7.48 (m, 10 H), 4.39 - 4.64 (m, 4 H), 3.30 - 3.77 (m, 8 H), 2.92 - 3.23 (m, 2 H), 2.82 (s, 3 H), 2.65 (s, 3 H), 2.43 - 2.50 (m, 2 H), 2.11 - 2.26 (m, 2 H), 1.49 - 2.09 (m, 10 H), 1.23 - 1.44 (m, 2 H); <sup>13</sup>C NMR (101 MHz, DMSO-*d*<sub>6</sub>) δ ppm 138.8, 138.6, 128.2, 128.2, 127.3, 127.3, 74.8, 72.5, 69.1, 69.0, 66.0, 61.7, 54.1, 50.6, 40.6, 35.3, 34.6, 34.4, 28.8, 26.4, 26.3, 25.9, 25.5, 24.2, 22.0, 21.8; HRMS calcd for C<sub>16</sub>H<sub>24</sub>NO<sup>+</sup> [M<sup>+</sup>] 246.1858 found 246.1869.

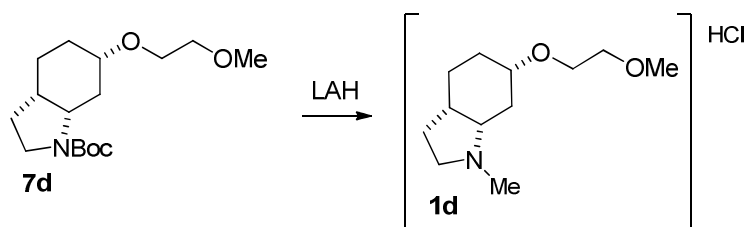

**1d: 6-(2-methoxyethoxy)-1-methyloctahydro-1H-indol, HCl**

**7d** (105 mg, 0.351 mmol, 1 eq) was dissolved in dry THF (8 ml) under N<sub>2</sub> atm. LAH (40 mg, 1.05 mmol, 3 eq) was added and the mixture was refluxed for 1.5 h. TLC showed full conversion of starting material. The reaction was quenched by adding ether (5 ml), and dropwise addition of water (40 μl), 15 % NaOH solution (40 μl) and H<sub>2</sub>O (80 μl) under vigorous stirring for 30 min and dried with magnesium sulfate. The mixture was filtered and added 2M HCl in Ether (1 ml) dropwise where by a colorless oil was formed at the bottom of the flask. The supernatant was removed and the remaining viscous oil evaporated to dryness. The title compound was isolated as a yellow oil (78 mg, 0.31mmol, 89 %). (Note that the diastereomerically pure compound appears as a mixture of diastereoisomers in the NMR spectra due to the two possible orientations of the protonated amine).

R<sub>f</sub> (free amine) = 0.45 (silica gel, EtOAc/MeOH/TEA, 45:45:10); <sup>1</sup>H NMR (400 MHz, DMSO-*d*<sub>6</sub>) δ ppm 11.53 (br s, 1 H), 9.78 (br s, 1 H), 3.36 - 3.64 (m, 12 H), 3.19 - 3.30 (m, 8 H), 2.90 - 3.18 (m, 2 H), 2.80 (s, 3 H), 2.61 (s, 3 H), 2.40 - 2.49 (m, 2 H), 1.87 - 2.16 (m, 4 H), 1.46 - 1.87 (m, 10 H), 1.15 - 1.32 (m, 2 H); <sup>13</sup>C NMR (101 MHz, DMSO-*d*<sub>6</sub>) δ ppm 75.2, 73.2, 71.5, 71.3, 66.7, 66.6, 66.2, 61.7, 58.2, 58.1, 54.0, 50.6, 40.6, 35.3, 34.6, 34.5, 28.5, 26.6, 26.3, 26.0, 25.5, 24.2, 22.0, 21.6; HRMS calcd for C<sub>12</sub>H<sub>24</sub>NO<sub>2</sub><sup>+</sup> [M<sup>+</sup>] 214.1807 found 214.1803.

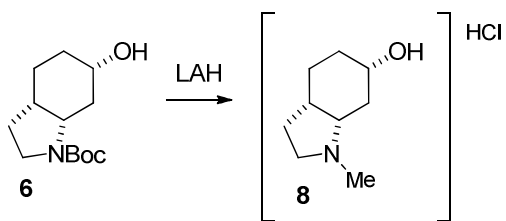

### 8: 1-methyloctahydro-1H-indol-6-ol, HCl

**6** (500 mg, 2.07 mmol, 1 eq) was dissolved in dry THF (10 ml) and added LiAlH<sub>4</sub> (236 mg, 6.22 mmol, 3 eq). Then refluxed for 3 h for full conversion of starting material and quenched by adding ether (10 ml), and dropwise addition of water (240  $\mu$ l), 15 % NaOH solution (240  $\mu$ l) and H<sub>2</sub>O (480  $\mu$ l) under vigorous stirring for 30 min and dried with magnesium sulfate. The mixture was filtered and added 2M HCl in Ether (5 ml) dropwise whereby a precipitate was formed at the bottom of the flask. The supernatant was removed and the remains were evaporated to dryness in order to provide the title compound as a white solid (360 mg, 1.88 mmol, 91%). (Note that the diastereomerically pure compound appears as a mixture of diastereoisomers in the NMR spectra due to the two possible orientations of the protonated amine).

R<sub>f</sub> (free amine) = 0.39 (silica gel, EtOAc/MeOH/TEA, 45:45:10); <sup>1</sup>H NMR (400 MHz, DMSO-*d*<sub>6</sub>)  $\delta$  11.60 (br s, 1H), 9.54 (br s, 1H), 4.78 (br s, 1H), 3.82 – 3.72 (m, 1H), 3.72 – 3.65 (m, 1H), 3.52 (dtd, *J* = 11.7, 5.4, 3.3 Hz, 1H), 3.49 – 3.35 (m, 3H), 3.12 (tdd, *J* = 11.8, 7.7, 4.9 Hz, 1H), 2.99 (m, 1H), 2.80 (s, 3H), 2.59 (s, 3H), 2.44 (m, 2H), 2.05 (m, 1H), 1.99 – 1.75 (m, 5H), 1.65 (m, 5H), 1.52 (dtd, *J* = 11.2, 6.8, 3.6 Hz, 4 H), 1.36 – 1.17 (m, 2H); <sup>13</sup>C NMR (101 MHz, DMSO)  $\delta$  66.6, 66.3, 64.2, 61.7, 53.9, 50.5, 35.1, 34.7, 34.5, 30.3, 29.4, 29.2, 28.8, 26.7, 24.2, 22.1, 21.6; HRMS calcd for C<sub>9</sub>H<sub>18</sub>NO<sup>+</sup> [M<sup>+</sup>] 156.1388 found 156.1400.

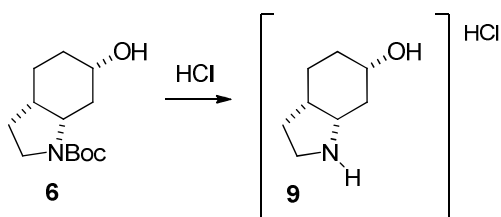

### 9: octahydro-1H-indol-6-ol, HCl

**6** (47 mg, 0.20 mmol, 1 eq) was dissolved in ether (1 ml) and 2M HCl in ether (0.97 ml, 1.95 mmol, 10 eq) was added dropwise to the solution. The mixture was stirred at rt for 2 h to furnish the desired product as the HCl salt. The supernatant was removed and the remaining viscous oil evaporated to dryness to provide the title compounds as a yellow viscous oil (29 mg, 0.16 mmol, 84%). (Note that the diastereomerically pure compound appears as a mixture of diastereoisomers in the NMR spectra due to the two possible orientations of the protonated amine).

R<sub>f</sub> (free amine) = 0.34 (silica gel, EtOAc/MeOH/TEA, 45:45:10); <sup>1</sup>H NMR (400 MHz, DMSO-*d*<sub>6</sub>)  $\delta$  9.65 (s, 2H), 8.35 (s, 2H), 3.57 (m, 4H), 3.46 – 3.30 (m, 2H), 3.22 – 3.04 (m, 2H), 2.31 – 2.13 (m, 2H), 1.96 – 1.76 (m, 6H), 1.72 – 1.31 (m, 10H); <sup>13</sup>C NMR (101 MHz, DMSO)  $\delta$  65.2, 56.8, 42.2, 35.4, 32.2, 29.1, 26.2, 21.1; HRMS calcd for C<sub>8</sub>H<sub>16</sub>NO<sup>+</sup> [M<sup>+</sup>] 142.1232 found 142.1254

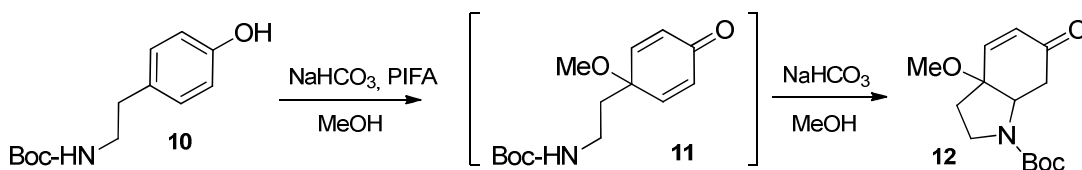

### 12: tert-butyl 3a-methoxy-6-oxo-2,3,3a,6,7,7a-hexahydro-1H-indole-1-carboxylate

*N*-Boc-tyramine (**10**, 2.0 g, 8.43 mmol, 1.0 eq) was dissolved in MeOH (50 ml) under N<sub>2</sub> atm. NaHCO<sub>3</sub> (2.83 g, 33.7 mmol, 4.0 eq) was added. The mixture was stirred for 10 min and then cooled to 0°C. PIFA (4.35 g, 10.1 mmol, 1.2 eq) was added in small portions over 30 min. and then stirred for additionally 30 min. The

reaction was filtered, concentrated *in vacuo* onto celite, and purified by dry column vacuum chromatography (Heptane -> EtOAc, 10% grad.) to obtain **11** as a colorless oil (1.46 g, 5.48 mmol, 65 %). Then redissolved in a solution of NaHCO<sub>3</sub> (2.30 g, 27.4 mmol, 5.0 Eq) in MeOH (50 ml) and stirred at rt for 15 h. The solvent was removed *in vacuo* and brine (50 ml) was added to the mixture. The mixture was extracted with ethyl acetate (4x40 ml), and the combined organic layers were washed with brine (30 ml), dried with Na<sub>2</sub>SO<sub>4</sub>, filtered, evaporated *in vacuo* onto celite and purified by dry column vacuum chromatography (Heptane -> EtOAc, 10% grad.) to obtain **12** as a yellow oil (1.38 g, 5.16 mmol, 94 %).

**11**:  $R_f$  = 0.68 (silica gel, heptanes/EtOAc, 1:1); <sup>1</sup>H NMR (400 MHz, CDCl<sub>3</sub>) δ 6.72 (d,  $J$  = 10.3 Hz, 2H), 6.30 (d,  $J$  = 10.3 Hz, 2H), 4.73 (s, 1H), 3.14 (m, 5H), 1.85 (t,  $J$  = 7.2 Hz, 2H), 1.36 (s, 9H); <sup>13</sup>C NMR (101 MHz, CDCl<sub>3</sub>) δ 184.9, 155.7, 150.1, 131.6, 79.4, 74.7, 53.0, 39.8, 36.1, 28.4; LRMS (LCMS) calcd for C<sub>14</sub>H<sub>22</sub>NO<sub>4</sub>+ [M<sup>+</sup>] 268.1549 found 268.

**12**:  $R_f$  = 0.70 (silica gel, heptanes/EtOAc, 1:1); <sup>1</sup>H NMR (400 MHz, CDCl<sub>3</sub>) δ ppm 6.70 - 6.87 (m, 1 H), 6.14 (m, 1 H), 4.26 - 4.54 (m, 1 H), 3.42 - 3.70 (m, 2 H), 3.28 (s, 3 H), 2.95 - 3.19 (m, 1 H), 2.40 (m, 1 H), 2.16 - 2.27 (m, 1 H), 2.06 - 2.16 (m, 1 H), 1.39 - 1.52 (m, 9 H); <sup>13</sup>C NMR (101 MHz, CHLOROFORM-*d*) δ ppm 196.9, 154.1, 148.2, 131.5, 82.0, 80.2, 58.0, 51.5, 44.8, 43.0, 34.5, 28.5; LRMS (LCMS) calcd for C<sub>14</sub>H<sub>22</sub>NO<sub>4</sub>+ [M<sup>+</sup>] 268.1549 found 268.

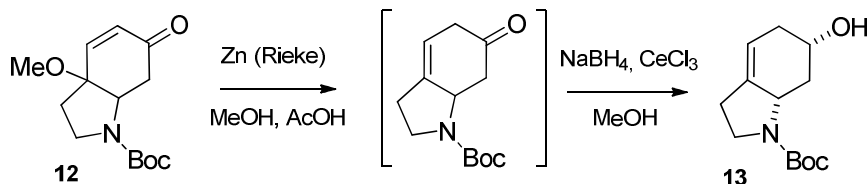

### **13: tert-butyl 6-hydroxy-2,3,5,6,7,7a-hexahydro-1H-indole-1-carboxylate**

**12** (1.20 g, 4.489 mmol, 1 eq) was dissolved in MeOH (60 ml). Zn (Rieke) (30 ml suspension, 1.50 g, 22.94 mmol, 5.1 eq) and AcOH (480 μl, 1.9 eq) were added. The mixture was stirred at rt for 25 min, TLC showed full conversion of starting material. The mixture was filtered through celite and the filter was washed with MeOH. CeCl<sub>3</sub> (150 mg, 0.609 mmol, 0.14 eq) was added. The mixture was cooled to -30°C and NaBH<sub>4</sub> (500 mg, 12.86 mmol, 2.9 eq) was added over 15 min. The mixture was stirred for additional 2 hours at -30°C. TLC showed full conversion of the ketone-intermediate. The mixture was evaporated *in vacuo* on celite and purified by dry column vacuum chromatography (Heptane -> EtOAc-> MeOH, 10% Grad.) to obtain **13** as a yellow oil (876 mg, 3.66 mmol, 82 %).

$R_f$  = 0.38 (silica gel, heptanes/EtOAc, 1:1); <sup>1</sup>H NMR (400 MHz, CDCl<sub>3</sub>) δ ppm 5.44 - 5.54 (m, 1 H), 3.93 - 4.07 (m, 2 H), 3.62 - 3.77 (m, 1 H), 3.15 (m, 1 H), 2.64 - 2.86 (m, 1 H), 2.35 - 2.55 (m, 2 H), 2.25 - 2.35 (m, 1 H), 1.94 - 2.04 (m, 1 H), 1.82 - 1.93 (m, 1 H), 1.48 (s, 9 H), 1.23 - 1.33 (m, 1 H); <sup>13</sup>C NMR (101 MHz, CDCl<sub>3</sub>) δ ppm 154.9, 138.8, 118.2, 79.5, 66.5, 56.0, 46.2, 38.5, 34.7, 30.2, 28.5; ; LRMS (GCMS) calcd for C<sub>13</sub>H<sub>21</sub>NO<sub>3</sub>+ [M<sup>+</sup>] 239.1521 found 239.

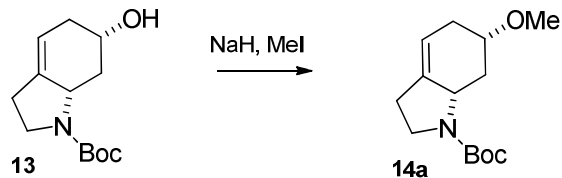

### **14a: tert-butyl 6-methoxy-2,3,5,6,7,7a-hexahydro-1H-indole-1-carboxylate**

**13** (300 mg, 1.25 mmol, 1 eq) was dissolved in dry DMF (15 ml) under N<sub>2</sub> atm. The mixture was cooled to 0 °C and NaH in a 60% suspension (125 mg, 3.12 mmol, 2.5 eq) was added slowly. The mixture was stirred at 0 °C for 30 min. The ice-bath was removed and methyl iodide (315 μl, 5.06 mmol, 4.0 eq) was added. The mixture was stirred at rt overnight. TLC showed almost full conversion of starting material. Brine was added (20 ml) and the mixture was extracted with ethyl acetate (3x20 ml). The combined organic layers were washed with water (40 ml), dried with Na<sub>2</sub>SO<sub>4</sub>, filtered, evaporated *in vacuo* on celite and purified by



column chromatography (Heptane→EtOAc, 5 % grad) to obtain the title compound as a colorless oil (282 mg, 1.11 mmol, 89 %).

$R_f$  = 0.72 (silica gel, heptanes/EtOAc, 1:1);  $^1\text{H NMR}$  (400 MHz,  $\text{CDCl}_3$ )  $\delta$  ppm 5.44 - 5.58 (m, 1 H), 3.89 - 4.05 (m, 1 H), 3.65 - 3.79 (m, 1 H), 3.47 - 3.59 (m, 1 H), 3.39 (s, 3 H), 3.09 - 3.23 (m, 1 H), 2.81 - 3.01 (m, 1 H), 2.37 - 2.57 (m, 2 H), 2.26 - 2.36 (m, 1 H), 1.92 - 2.04 (m, 1 H), 1.44 - 1.54 (s, 9 H), 1.02 - 1.20 (m, 1 H);  $^{13}\text{C NMR}$  (101 MHz,  $\text{CDCl}_3$ )  $\delta$  ppm 154.9, 139.1, 118.1, 79.4, 75.3, 56.1, 56.0, 46.2, 34.1, 32.0, 30.2, 28.6 ; ; LRMS (GCMS) calcd for  $\text{C}_{14}\text{H}_{23}\text{NO}_3 + [\text{M}^+]$  253.1678 found 253.

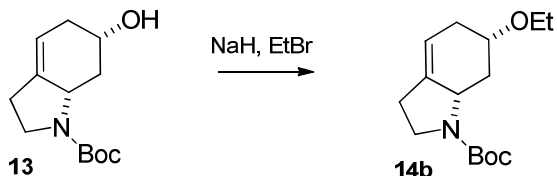

#### **14b: tert-butyl 6-ethoxy-2,3,5,6,7,7a-hexahydro-1H-indole-1-carboxylate**

**13** (180 mg, 0.752 mmol, 1 eq) was dissolved in dry DMF (10 ml) under  $\text{N}_2$  atm. The mixture was cooled to 0 °C and NaH in a 60% suspension (125 mg, 3.134 mmol, 4.2 eq) was added slowly. The mixture was stirred at 0 °C for 20 min. The ice-bath was removed and ethyl bromide (141  $\mu\text{l}$ , 1.888 mmol, 2.5 eq) was added. The mixture was stirred at rt overnight. TLC showed full conversion of starting material. Brine was added (20 ml) and the mixture was extracted with ethyl acetate (3x20 ml). The combined organic layers were washed with water (40 ml), dried with  $\text{Na}_2\text{SO}_4$ , filtered, evaporated *in vacuo* on celite and purified by column chromatography (Heptane→EtOAc, 5 % grad) to obtain the title compound as a colorless oil (82 mg, 0.308 mmol, 41 %).

$R_f$  = 0.75 (silica gel, heptanes/EtOAc, 1:1);  $^1\text{H NMR}$  (400 MHz,  $\text{CDCl}_3$ )  $\delta$  ppm 5.41 - 5.60 (m, 1 H), 3.88 - 4.06 (m, 1 H), 3.66 - 3.77 (m, 1 H), 3.56 - 3.66 (m, 2 H), 3.47 - 3.57 (m, 1 H), 3.08 - 3.22 (m, 1 H), 2.76 - 2.97 (m, 1 H), 2.36 - 2.55 (m, 2 H), 2.25 - 2.35 (m, 1 H), 1.92 - 2.08 (m, 1 H), 1.49 (s, 9 H), 1.22 (m, 3 H), 1.07 - 1.17 (m, 1 H);  $^{13}\text{C NMR}$  (101 MHz,  $\text{CDCl}_3$ )  $\delta$  ppm 154.8, 139.0, 118.3, 79.3, 73.5, 63.7, 56.1, 46.2, 34.9, 32.4, 30.2, 28.5 , 15.6; ; LRMS (GCMS) calcd for  $\text{C}_{15}\text{H}_{25}\text{NO}_3 + [\text{M}^+]$  267.1834 found 267.

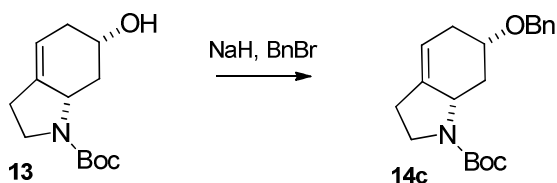

#### **14c: tert-butyl 6-(benzyloxy)-2,3,5,6,7,7a-hexahydro-1H-indole-1-carboxylate**

**13** (274 mg, 1.15 mmol, 1 eq) was dissolved in dry DMF (10 ml) under  $\text{N}_2$  atm. The mixture was cooled to 0 °C and NaH in a 60% suspension (150 mg, 3.750 mmol, 3.3 eq) was added slowly. The mixture was stirred at 0 °C for 20 min. The ice-bath was removed and benzyl bromide (600  $\mu\text{l}$ , 5.05 mmol, 4.4 eq) was added. The mixture was stirred at rt overnight. TLC showed full conversion of starting material. Brine was added (20 ml) and the mixture was extracted with ethyl acetate (3x20 ml). The combined organic layers were washed with water (40 ml), dried with  $\text{Na}_2\text{SO}_4$ , filtered, evaporated *in vacuo* on celite and purified by column chromatography (EtOAc:Heptane 1:2) to obtain **14c** as bright yellow solid (246 mg, 0.747 mmol, 65 %).

$R_f$  = 0.86 (silica gel, heptanes/EtOAc, 1:1); Mp: (108.2 – 109.1 °C);  $R_f$  = 0.57 (silica gel, heptanes/EtOAc, 2:1);  $^1\text{H NMR}$  (400 MHz,  $\text{CDCl}_3$ )  $\delta$  ppm 7.28 - 7.41 (m, 5 H), 5.43 - 5.61 (m, 1 H), 4.45 - 4.77 (m, 2 H), 3.87 - 4.07 (m, 1 H), 3.61 - 3.80 (m, 2 H), 3.09 - 3.23 (m, 1 H), 2.87 - 3.07 (m, 1 H), 2.47 - 2.58 (m, 1 H), 2.36 - 2.46 (m, 1 H), 2.27 - 2.36 (m, 1 H), 2.02 - 2.17 (m, 1 H), 1.50 (s, 9 H), 1.13 - 1.34 (m, 1 H);  $^{13}\text{C NMR}$  (101 MHz,  $\text{CDCl}_3$ )  $\delta$  ppm 154.9, 138.7, 128.4, 127.8, 127.6, 127.5, 118.2, 79.4, 73.2, 70.3, 56.1, 46.2, 34.6, 32.4, 30.2, 28.54; LRMS (GCMS) calcd for  $\text{C}_{20}\text{H}_{27}\text{NO}_3 + [\text{M}^+]$  329.1991 found 329.

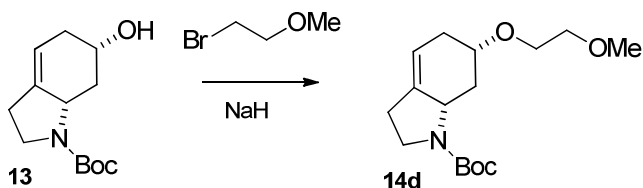

**14d: tert-butyl 6-(2-methoxyethoxy)-2,3,5,6,7,7a-hexahydro-1H-indole-1-carboxylate**

**13** (198 mg, 0.827 mmol, 1 eq) was dissolved in dry DMF (10 ml) under N<sub>2</sub> atm. The mixture was cooled to 0 °C and NaH in a 60% suspension (100 mg, 2.500 mmol, 3.0 eq) was added slowly. The mixture was stirred at 0 °C for 15 min. The ice-bath was removed and 2-methoxy ethylbromide (200 μl, 2.128 mmol, 2.6 eq) was added. The mixture was stirred at rt overnight. TLC showed almost full conversion of starting material. Brine was added (20 ml) and the mixture was extracted with ethyl acetate (3x20 ml). The combined organic layers were washed with water (40 ml), dried with Na<sub>2</sub>SO<sub>4</sub>, filtered, evaporated *in vacuo* on celite and purified by column chromatography (EtOAc:Heptane 1:1) to obtain **14d** as a yellowish oil (90 mg, 0.302 mmol, 37 %).  $R_f = 0.55$  (silica gel, heptanes/EtOAc, 1:1); <sup>1</sup>H NMR (400 MHz, CDCl<sub>3</sub>) δ ppm 5.40 - 5.56 (m, 1 H), 3.89 - 4.01 (m, 1 H), 3.58 - 3.75 (m, 4 H), 3.54 (m, 2 H), 3.38 (s, 3 H), 3.14 (m, 1 H), 2.78 - 3.01 (m, 1 H), 2.36 - 2.55 (m, 2 H), 2.23 - 2.35 (m, 1 H), 1.96 - 2.11 (m, 1 H), 1.48 (s, 9 H), 1.07 - 1.29 (m, 1 H); <sup>13</sup>C NMR (101 MHz, CDCl<sub>3</sub>) δ ppm 154.8, 139.0, 118.2, 79.3, 74.4, 72.2, 67.7, 59.1, 56.0, 46.2, 34.5, 32.2, 30.2, 28.5; LRMS (GCMS) calcd for C<sub>16</sub>H<sub>27</sub>NO<sub>4</sub>+ [M<sup>+</sup>] 297.1940 found 297.

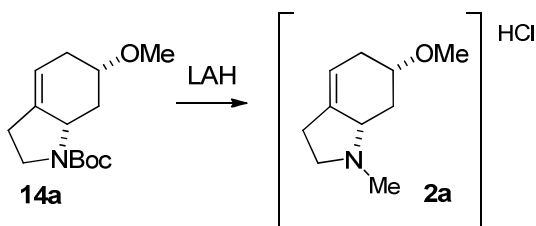

**14a: 6-methoxy-1-methyl-2,3,5,6,7,7a-hexahydro-1H-indol, HCl**

**2a** (90 mg, 0.355 mmol, 1 eq) was dissolved in dry THF (5 ml) under N<sub>2</sub> atm. LAH (45 mg, 1.186 mmol, 3.3 eq) was added and the mixture was refluxed for 1 h, quenched by adding ether (5 ml), and dropwise addition of water (45 μl), 15 % NaOH solution (45 μl) and H<sub>2</sub>O (90 μl) under vigorous stirring for 30 min and dried with magnesium sulfate. The mixture was filtered and added 2M HCl in Ether (1 ml) dropwise whereby a precipitate was formed at the bottom of the flask. The supernatant was removed and the remains were evaporated to dryness in order to provide the title compound as an off-white solid (61 mg, 0.297 mmol, 84 %).

$R_f$  (free amine) = 0.40 (silica gel, EtOAc/MeOH/TEA, 45:45:10); <sup>1</sup>H NMR (400 MHz, D<sub>2</sub>O) δ ppm 5.71 - 5.83 (m, 1 H), 3.65 - 3.90 (m, 3 H), 3.42 (s, 3 H), 3.20 - 3.33 (m, 1 H), 2.95 (s, 3 H), 2.75 - 2.86 (m, 1 H), 2.67 - 2.74 (m, 1 H), 2.55 - 2.67 (m, 2 H), 1.91 - 2.09 (m, 1 H), 1.42 (q,  $J = 11.29$  Hz, 1 H); <sup>13</sup>C NMR (101 MHz, DMSO-*d*<sub>6</sub>) δ ppm 133.5, 120.7, 73.9, 65.0, 55.5, 53.7, 37.2, 31.1, 28.6, 25.9; HRMS calcd for C<sub>10</sub>H<sub>18</sub>NO+ [M<sup>+</sup>] 168.1388 found 168.1380

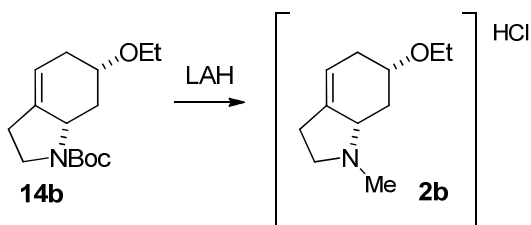

**2b: 6-ethoxy-1-methyl-2,3,5,6,7,7a-hexahydro-1H-indol, HCl**

**14b** (80 mg, 0.2994 mmol, 1 eq) was dissolved in dry THF (5 ml) under N<sub>2</sub> atm. LAH (40 mg, 1.054 mmol, 3.5 eq) was added and the mixture was refluxed for 1 h, quenched by adding ether (5 ml), and dropwise addition of water (40 μl), 15 % NaOH solution (40 μl) and H<sub>2</sub>O (80 μl) under vigorous stirring for 30 min and dried with magnesium sulfate. The mixture was filtered and added 2M HCl in Ether (1 ml) dropwise whereby a viscous oil was formed at the bottom of the flask. The supernatant was removed and the remains were evaporated to dryness in order to provide the title compound as a yellow oil (63 mg, 0.290 mmol, 97 %).

R<sub>f</sub> (free amine) = 0.45 (silica gel, EtOAc/MeOH/TEA, 45:45:10); <sup>1</sup>H NMR (400 MHz, D<sub>2</sub>O) δ ppm 5.71 - 5.82 (m, 1 H), 3.75 - 3.89 (m, 3 H), 3.58 - 3.73 (m, 2 H), 3.19 - 3.32 (m, 1 H), 2.95 (s, 3 H), 2.73 - 2.86 (m, 1 H), 2.54 - 2.71 (m, 3 H), 1.94 - 2.05 (m, 1 H), 1.44 (q, *J*=11.17 Hz, 1 H), 1.13 - 1.23 (m, 3 H); <sup>13</sup>C NMR (101 MHz, D<sub>2</sub>O) δ ppm 132.0, 122.2, 72.9, 66.1, 64.4, 55.0, 37.6, 31.0, 29.4, 25.6, 14.5; HRMS calcd for C<sub>11</sub>H<sub>20</sub>NO<sup>+</sup> [M<sup>+</sup>] 182.1545 found 182.1547.

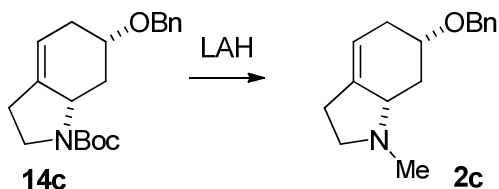

**12c: 6-(benzyloxy)-1-methyl-2,3,5,6,7,7a-hexahydro-1H-indole**

**11c** (240 mg, 0.729 mmol, 1 eq) was dissolved in dry THF (10 ml) under N<sub>2</sub> atm. LAH (82 mg, 2.161 mmol, 3.0 eq) was added and the mixture was refluxed for 1 h. TLC showed almost full conversion of starting material. Excess of LAH was quenched by adding Ether (5 ml), H<sub>2</sub>O (82 μl), 15 % NaOH solution (82 μl) and H<sub>2</sub>O (164 μl). The mixture was filtered, concentrated *in vacuo* on celite and purified by dry column vacuum chromatography (Hep→EtOAc (10 % TEA), 5 % grad) to obtain the title compound as a yellow oil (67 mg, 0.275 mmol, 38 %).

R<sub>f</sub> (free amine) = 0.47 (silica gel, EtOAc/MeOH/TEA, 45:45:10); <sup>1</sup>H NMR (400 MHz, CDCl<sub>3</sub>) δ ppm 7.28 - 7.41 (m, 5 H), 5.30 - 5.45 (m, 1 H), 4.64 (s, 2 H), 3.64 - 3.81 (m, 1 H), 3.15 (m, 1 H), 2.48 - 2.58 (m, 1 H), 2.33 - 2.47 (m, 7 H), 2.22 (q, *J*=9.03 Hz, 1 H), 2.04 - 2.16 (m, 1 H), 1.22 - 1.41 (m, 1 H); <sup>13</sup>C NMR (101 MHz, CDCl<sub>3</sub>) δ ppm 140.5, 138.7, 128.3, 127.6, 127.5, 116.0, 73.9, 70.3, 65.9, 55.9, 40.3, 34.0, 32.3, 27.6; HRMS calcd for C<sub>16</sub>H<sub>22</sub>NO<sup>+</sup> [M<sup>+</sup>] 244.1701 found 244.1709.

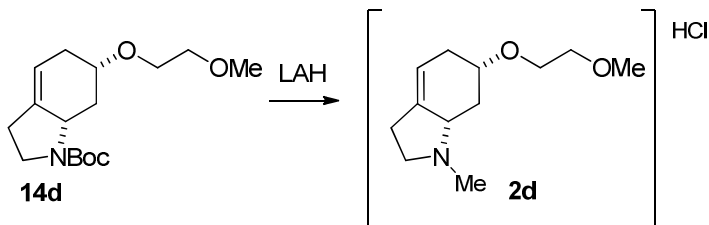

**2d: 6-(2-methoxyethoxy)-1-methyl-2,3,5,6,7,7a-hexahydro-1H-indol, HCl**

**14d** (90 mg, 0.303 mmol, 1 eq) was dissolved in dry THF (6 ml) under N<sub>2</sub> atm. LAH (38 mg, 1.001 mmol, 3.3 eq) was added and the mixture was refluxed for 1 h. TLC showed full conversion of starting material. Excess of LAH was quenched by adding Ether (5 ml), H<sub>2</sub>O (38 μl), 15 % NaOH solution (38 μl) and H<sub>2</sub>O (76 μl). The mixture was filtered and the filter was washed with ether. The mixture was evaporated until almost all solvent was removed. Ether (5 ml) and 2 M HCl in Ether (0.5 ml) was added. A yellowish oil was formed at the bottom of the flask. The supernatant was removed and the remaining solvent was evaporated *in vacuo*. **2d** was isolated as yellow oil (72 mg, 0.291 mmol, 96 %).

R<sub>f</sub> (free amine) = 0.31 (silica gel, EtOAc/MeOH/TEA, 45:45:10); <sup>1</sup>H NMR (400 MHz, D<sub>2</sub>O) δ ppm 5.68 - 5.80 (m, 1 H), 3.69 - 3.90 (m, 5 H), 3.62 (t, *J*=4.27 Hz, 2 H), 3.37 (s, 3 H), 3.27 (q, *J*=10.30 Hz, 1 H), 2.95 (s, 3 H), 2.74 - 2.86 (m, 1 H), 2.54 - 2.72 (m, 3 H), 1.96 - 2.09 (m, 1 H), 1.46 (q, *J*=11.42 Hz, 1 H); <sup>13</sup>C NMR

(101 MHz, D<sub>2</sub>O)  $\delta$  ppm 132.0, 122.1, 73.4, 71.2, 67.2, 66.1, 58.1, 55.0, 37.7, 30.8, 29.3, 25.6; HRMS calcd for C<sub>12</sub>H<sub>22</sub>NO<sub>2</sub><sup>+</sup> [M<sup>+</sup>] 212.1651 found 212.1656.

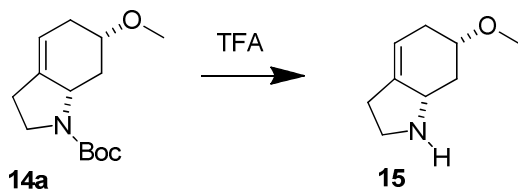

**15: 6-methoxy-2,3,5,6,7,7a-hexahydro-1H-indole**

A solution of **14a** (33 mg, 0.13 mmol, 1.0 Eq) in dry DCM (2 ml) was cooled to 0°C and added TFA (0.50 mL, 50 Eq) and stirred for 1 h. Then evaporated crude onto Celite and purified by dry column vacuum chromatography (EtOAc  $\rightarrow$  MeOH (10% NH<sub>3</sub>), 10% Grad.) to obtain **15** as a colorless oil (17 mg, 0.11 mmol, 85%).

R<sub>f</sub> (free amine) = 0.55 (silica gel, EtOAc/MeOH/TEA, 45:45:10); <sup>1</sup>H NMR (400 MHz, MeOD)  $\delta$  5.55 (dq, *J* = 4.4, 2.2 Hz, 1H), 3.56 (m, 2H), 3.39 (s, 3H), 3.21 (ddd, *J* = 11.3, 8.5, 4.5 Hz, 1H), 3.07 (ddd, *J* = 11.3, 9.2, 7.6 Hz, 1H), 2.60 – 2.44 (m, 4H), 2.02 – 1.89 (m, 1H), 1.30 (q, *J* = 11.2 Hz, 1H); <sup>13</sup>C NMR (101 MHz, MeOD)  $\delta$  139.6, 118.9, 76.8, 59.0, 56.4, 45.8, 34.2, 33.0, 29.5; HRMS calcd for C<sub>9</sub>H<sub>16</sub>NO<sup>+</sup> [M<sup>+</sup>] 154.1232 found 154.1228.

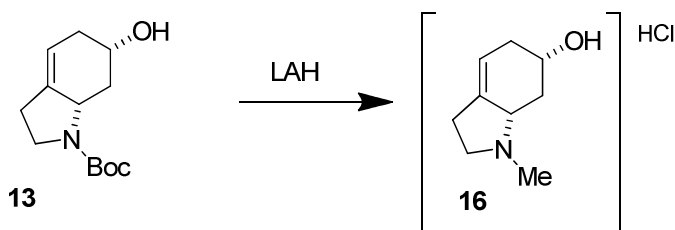

**16: 1-methyl-2,3,5,6,7,7a-hexahydro-1H-indol-6-ol, HCl**

**13** (100 mg, 0.418 mmol, 1.0 Eq) was dissolved in dry THF (5 ml), cooled to 0 °C, and slowly added LAH (48 mg, 1.25 mmol, 3.0 Eq). Then refluxed for 3 h for full conversion of starting material and quenched by adding ether (5 ml), and dropwise addition of water (50  $\mu$ l), 15 % NaOH solution (50  $\mu$ l) and H<sub>2</sub>O (100  $\mu$ l) under vigorous stirring for 30 min and dried with magnesium sulfate. The mixture was filtered and added 2M HCl in Ether (1.5 ml) dropwise whereby a precipitate was formed at the bottom of the flask. The supernatant was removed and the remains were evaporated to dryness to provide the title compound as white hygroscopic solid (69 mg, 0.364 mmol, 87 %).

R<sub>f</sub> (free amine) = 0.46 (silica gel, EtOAc/MeOH/TEA, 45:45:10); <sup>1</sup>H NMR (400 MHz, MeOD)  $\delta$  5.76 (dt, *J* = 4.7, 2.4 Hz, 1H), 3.95 (dddd, *J* = 11.8, 9.4, 6.0, 3.5 Hz, 1H), 3.79 (ddd, *J* = 12.0, 9.0, 3.3 Hz, 2H), 3.29 – 3.21 (m, 1H), 2.95 (s, 3H), 2.87 – 2.74 (m, 1H), 2.64 (m, 1H), 2.56 – 2.44 (m, 2H), 2.03 (m, 1H), 1.53 (q, *J* = 11.2 Hz, 1H); <sup>13</sup>C NMR (101 MHz, MeOD)  $\delta$  133.7, 124.0, 67.6, 66.2, 56.1, 38.4, 35.1, 34.1, 27.0; HRMS calcd for C<sub>9</sub>H<sub>16</sub>NO<sup>+</sup> [M<sup>+</sup>] 154.1232 found 154.1247.

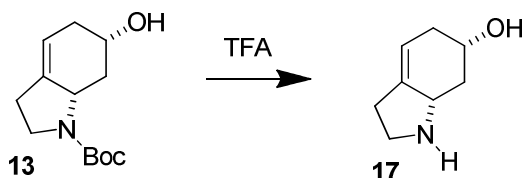

**17: 2,3,5,6,7,7a-hexahydro-1H-indol-6-ol**

A solution of **13** (33 mg, 0.13 mmol, 1.0 Eq) in dry DCM (4 ml) was cooled to 0°C and added TFA (1.0 mL, 50 Eq) and stirred for 1 h. Then evaporated crude onto Celite and purified by dry column vacuum

chromatography (EtOAc → MeOH (10% NH<sub>3</sub>), 10% Grad.) to obtain **17** as a colorless oil (32 mg, 0.23 mmol, 89 %).

$R_f$  (free amine) = 0.38 (silica gel, EtOAc/MeOH/TEA, 45:45:10); <sup>1</sup>H NMR (400 MHz, MeOD) δ 5.63 (dt,  $J$  = 4.6, 2.3 Hz, 1H), 3.94 (m, 1H), 3.81 – 3.67 (m, 1H), 3.34 – 3.27 (m, 1H), 3.21 (ddd,  $J$  = 11.6, 9.6, 7.3 Hz, 1H), 2.68 – 2.41 (m, 3H), 2.41 – 2.32 (m, 1H), 2.00 (m, 1H), 1.49 (q,  $J$  = 11.2 Hz, 1H); <sup>13</sup>C NMR (101 MHz, MeOD) δ 137.2, 120.9, 66.8, 59.1, 45.5, 36.7, 35.5, 28.8; LRMS (LCMS) calcd for C<sub>8</sub>H<sub>14</sub>NO<sup>+</sup> [M<sup>+</sup>] 140.1075 found 140.1082.

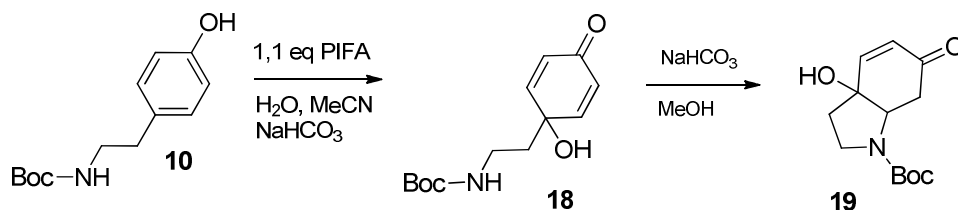

#### **19: tert-butyl 3a-hydroxy-6-oxo-2,3,3a,6,7,7a-hexahydro-1H-indole-1-carboxylate**

*N*-Boc-tyramine (1.2 g, 5.06 mmol, 1.0 eq) was dissolved in MeCN (40 ml) and water (10 ml) under N<sub>2</sub> atm. and NaHCO<sub>3</sub> (1.70 g, 20.2 mmol, 4.0 eq) was added. The mixture was cooled to 0°C and then PIFA (2.61 g, 6.07 mmol, 1.2 eq) was added in small portions over 30 min. and then stirred for additionally 30 min. The reaction was filtered, concentrated *in vacuo* onto celite, and purified by dry column vacuum chromatography (Heptane → EtOAc → MeOH, 10% grad.) to obtain **18** as a colorless oil (0.88 g, 3.47 mmol, 69 %). Then redissolved in a solution of NaHCO<sub>3</sub> (1.46 g, 17.4 mmol, 5.0 Eq) in MeOH (20 ml) and stirred at rt for 15 h. The solvent was removed *in vacuo* and brine (30 ml) was added to the mixture. The mixture was extracted with ethyl acetate (3×30 ml), and the combined organic layers were washed with brine (20 ml), dried with Na<sub>2</sub>SO<sub>4</sub>, filtered, evaporated *in vacuo* onto celite and purified by dry column vacuum chromatography (Heptane → EtOAc → MeOH, 10% grad.) to obtain **19** as a yellow oil (0.81 g, 3.20 mmol, 92 %).

**18**:  $R_f$  = 0.62 (silica gel, heptanes/EtOAc, 1:1); <sup>1</sup>H NMR (400 MHz, Chloroform-*d*) δ 6.88 – 6.76 (m, 2H), 6.19 – 6.04 (m, 2H), 4.77 (s, 1H), 3.19 (m,  $J$  = 6.9 Hz, 2H), 2.97 (s, 1H), 1.87 (t,  $J$  = 7.0 Hz, 2H), 1.37 (s, 9H); <sup>13</sup>C NMR (101 MHz, CDCl<sub>3</sub>) δ 185.2, 156.2, 150.5, 128.1, 79.9, 68.9, 40.4, 36.1, 28.4; LRMS (LCMS) calcd for C<sub>13</sub>H<sub>20</sub>NO<sub>4</sub><sup>+</sup> [M<sup>+</sup>] 254.1392 found 254.

**19**:  $R_f$  = 0.61 (silica gel, heptanes/EtOAc, 1:1); LRMS (LCMS) calcd for C<sub>13</sub>H<sub>20</sub>NO<sub>4</sub><sup>+</sup> [M<sup>+</sup>] 254.1392 found 254.

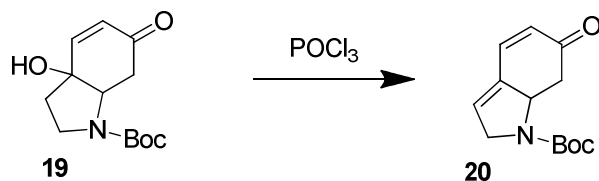

#### **20: tert-butyl 6-oxo-2,6,7,7a-tetrahydro-1H-indole-1-carboxylate**

**19** (550 mg, 2.17 mmol, 1.0 Eq) was dissolved in pyridine (10 ml) and POCl<sub>3</sub> (0.506 ml, 5.43 mmol, 2.5 Eq) was added dropwise at rt and stirred for 15 h. Then the mixture was cooled on ice and a saturated aqueous solution of sodium bicarbonate (50 ml) was added and after stirring for 10 minutes, the mixture was extracted with dichloromethane (3×30 mL). The combined organic phases were washed with brine (30 mL), dried with magnesium sulfate and concentrated *in vacuo* to provide the title compound as a colorless oil (439 mg, 1.87 mmol, 86 % yield). The product was moved on crude in the next step.

$R_f$  = 0.68 (silica gel, Heptane/EtOAc, 1:2); <sup>1</sup>H NMR (400 MHz, Chloroform-*d*) δ 7.15 (t,  $J$  = 8.5 Hz, 1H), 6.01 – 5.69 (m, 2H), 4.82 – 4.64 (m, 1H), 4.29 (d,  $J$  = 17.9 Hz, 2H), 3.29 – 3.14 (m, 1H), 2.37 (ddd,  $J$  = 20.0, 13.8, 7.7 Hz, 1H), 1.42 (d,  $J$  = 5.7 Hz, 9H); <sup>13</sup>C NMR (101 MHz, CDCl<sub>3</sub>) δ 197.6, 154.4, 138.5, 135.6, 129.6, 125.3, 80.6, 61.4, 55.5, 46.1, 28.5; LRMS (LCMS) calcd for C<sub>13</sub>H<sub>18</sub>NO<sub>3</sub><sup>+</sup> [M<sup>+</sup>] 236.1287 found 236.

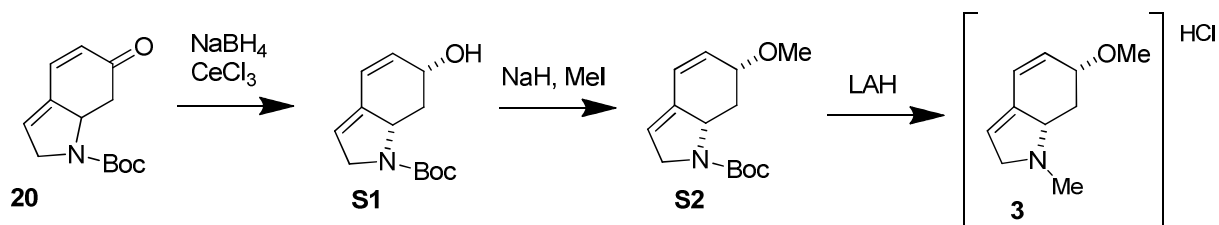

### 3: 6-methoxy-1-methyl-2,6,7,7a-tetrahydro-1H-indole, HCl

**20** (103 mg, 0.438 mmol) and  $\text{CeCl}_3$  (11 mg, 0.044 mmol, 0.10 Eq) was dissolved in MeOH (5 ml) and cooled to 0 °C. Then sodium borohydride (16.6 mg, 0.438 mmol, 1.0 Eq) was added and stirred for 30 min for full conversion of starting material. The mixture was evaporated directly onto celite and purified by dry column vacuum chromatography (Heptane->EA->MeOH, 10% grad.) to furnish diene-ol (**S1**) as a colorless oil as a mixture of rotamers (93 mg, 0.392 mmol, 90%).  $R_f$  = 0.75 (silica gel, Heptane/EtOAc, 1:2); LRMS (LCMS) calcd for  $\text{C}_{13}\text{H}_{20}\text{NO}_3$  +  $[\text{M}^+]$  238.1443 found 238.

The diene-ol (**S1**, 93 mg, 0.392 mmol, 1.0 eq) was dissolved in dry DMF (3 ml) and cooled to 0 degrees, addition of sodium hydride (24 mg, 0.600 mmol, 1.5 eq) and stirred for 30 min. Then methyl iodide (0.123 ml, 1.96 mmol, 5.0 eq) was added and the mixture was stirred at rt for 15 h. Brine was added to the mixture (30 ml) and extracted with EtOAc (3x30 mL). The combined organic layers were washed with brine (2x10 mL), dried with magnesium sulfate, filtered, concentrated *in vacuo* onto celite, and purified by dry column vacuum chromatography (Heptane->EtOAc, 5% grad). To furnish the methylether (**S2**) as a colorless oil as a mixture of rotamers (85 mg, 0.338 mmol, 86%).  $R_f$  = 0.70 (silica gel, Heptane/EtOAc, 1:2); LRMS (LCMS) calcd for  $\text{C}_{14}\text{H}_{22}\text{NO}_3$  +  $[\text{M}^+]$  252.1600 found 252.

The methylether (**S2**, 85 mg, 0.338 mmol, 1.0 Eq) was dissolved in dry THF (3 ml) and added LAH (39 mg, 1.01 mmol, 3.0 Eq) slowly at rt. Then refluxed for 3 h for full conversion. and quenched by adding ether (5 ml), and dropwise addition of water (40  $\mu\text{l}$ ), 15 % NaOH solution (40  $\mu\text{l}$ ) and  $\text{H}_2\text{O}$  (80  $\mu\text{l}$ ) under vigorous stirring for 30 min and dried with magnesium sulfate. The mixture was filtered and added 2M HCl in Ether (1.5 ml) dropwise whereby a viscous oil was formed at the bottom of the flask. The supernatant was removed and the remains were evaporated to dryness to provide the title compound **3** as a yellow oil (61 mg, 0.302 mmol, 89 % yield).

$R_f$  (free amine) = 0.43 (silica gel, EtOAc/MeOH/TEA, 45:45:10);  $^1\text{H}$  NMR (400 MHz, MeOD)  $\delta$  6.34 (dd,  $J$  = 10.1, 2.2 Hz, 1H), 6.06 (d,  $J$  = 10.0 Hz, 1H), 5.73 (d,  $J$  = 2.2 Hz 1H), 4.46 – 4.32 (m, 1H), 4.31 – 4.22 (m, 1H), 4.11 (m, 1H), 3.61 – 3.53 (m, 1H), 3.44 (s, 3H), 3.08 (s, 3H), 1.79 – 1.64 (m, 1H), 1.64 – 1.54 (m, 1H);  $^{13}\text{C}$  NMR (101 MHz, MeOD)  $\delta$  138.0, 136.5, 121.8, 117.6, 76.7, 69.8, 62.8, 57.0, 38.7, 32.0, 30.2; HRMS calcd for  $\text{C}_{10}\text{H}_{16}\text{NO}^+$   $[\text{M}^+]$  166.1232 found 166.1225

### 1.3. Pharmacological data

| Compound      | R  | R'                                  | Binding $K_i$ ( $\mu\text{M}$ ) |                   |                   | Functional $\text{IC}_{50}$ ( $\mu\text{M}$ ) |                   |
|---------------|----|-------------------------------------|---------------------------------|-------------------|-------------------|-----------------------------------------------|-------------------|
|               |    |                                     | $\alpha 4\beta 2$               | $\alpha 4\beta 4$ | $\alpha 3\beta 4$ | $\alpha 4\beta 2$                             | $\alpha 3\beta 4$ |
| DH $\beta$ E  | -  | -                                   | 0.82<br>[6.09 $\pm$ 0.07]       | $\sim$ 100        | $\sim$ 100        | 1.2<br>[5.92 $\pm$ 0.06]                      | $\sim$ 100        |
| <b>8</b><br>  | Me | H                                   | $\square$ 300                   | $\square$ 300     | $\square$ 300     | $\square$ 300                                 | $\square$ 300     |
| <b>1a</b><br> | Me | Me                                  | $\sim$ 300                      | $\square$ 300     | $\square$ 300     | $\square$ 300                                 | $\square$ 300     |
| <b>1b</b><br> | Me | Et                                  | $\sim$ 300                      | $\square$ 300     | $\sim$ 300        | $\square$ 300                                 | $\square$ 300     |
| <b>1c</b><br> | Me | Bn                                  | $\sim$ 100                      | $\sim$ 300        | $\sim$ 100        | $\square$ 300                                 | $\square$ 300     |
| <b>1d</b><br> | Me | (CH <sub>2</sub> ) <sub>2</sub> OMe | $\sim$ 300                      | $\square$ 300     | $\sim$ 300        | $\square$ 300                                 | $\square$ 300     |
| <b>9</b><br>  | H  | H                                   | $\square$ 300                   | $\square$ 300     | $\square$ 300     | $\square$ 300                                 | $\square$ 300     |
| <b>16</b><br> | Me | H                                   | $\sim$ 300                      | $\square$ 300     | $\square$ 300     | $\square$ 300                                 | $\square$ 300     |
| <b>2a</b><br> | Me | Me                                  | <b>3.4</b><br>[5.46 $\pm$ 0.07] | $\sim$ 100        | $\sim$ 300        | <b><math>\sim</math>30</b>                    | $\square$ 300     |
| <b>2b</b><br> | Me | Et                                  | $\sim$ 300                      | $\square$ 300     | $\square$ 300     | $\square$ 300                                 | $\square$ 300     |
| <b>2c</b><br> | Me | Bn                                  | $\sim$ 300                      | $\sim$ 300        | $\sim$ 300        | $\square$ 300                                 | $\square$ 300     |
| <b>2d</b><br> | Me | (CH <sub>2</sub> ) <sub>2</sub> OMe | $\square$ 300                   | $\square$ 300     | $\square$ 300     | $\square$ 300                                 | $\square$ 300     |
| <b>17</b><br> | H  | H                                   | $\square$ 300                   | $\square$ 300     | $\square$ 300     | $\square$ 300                                 | $\square$ 300     |
| <b>15</b><br> | H  | Me                                  | $\sim$ 300                      | $\square$ 300     | $\square$ 300     | $\sim$ 100                                    | $\square$ 300     |
| <b>3</b><br>  | Me | Me                                  | $\sim$ 30                       | $\square$ 300     | $\square$ 300     | $\sim$ 100                                    | $\square$ 300     |

### 1.4. NMR spectra

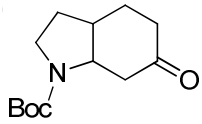

CDCl<sub>3</sub>, 400 MHz

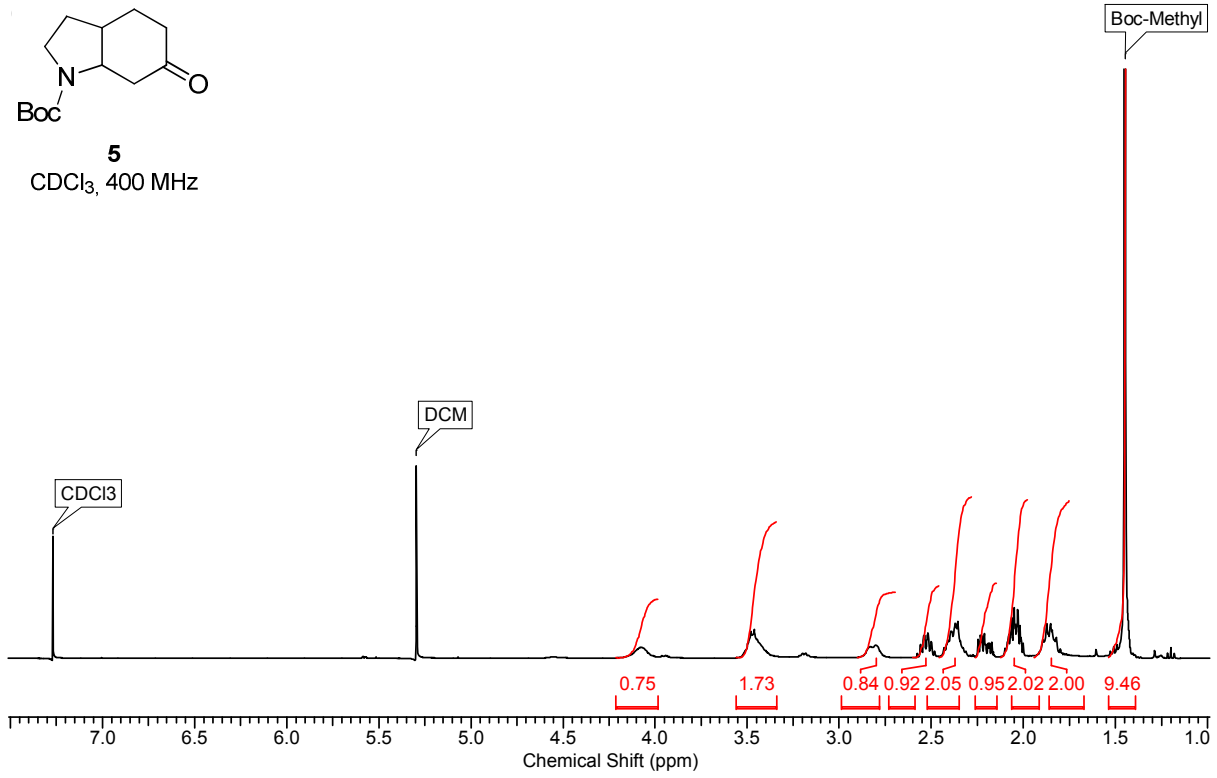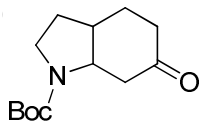

CDCl<sub>3</sub>, 101 MHz

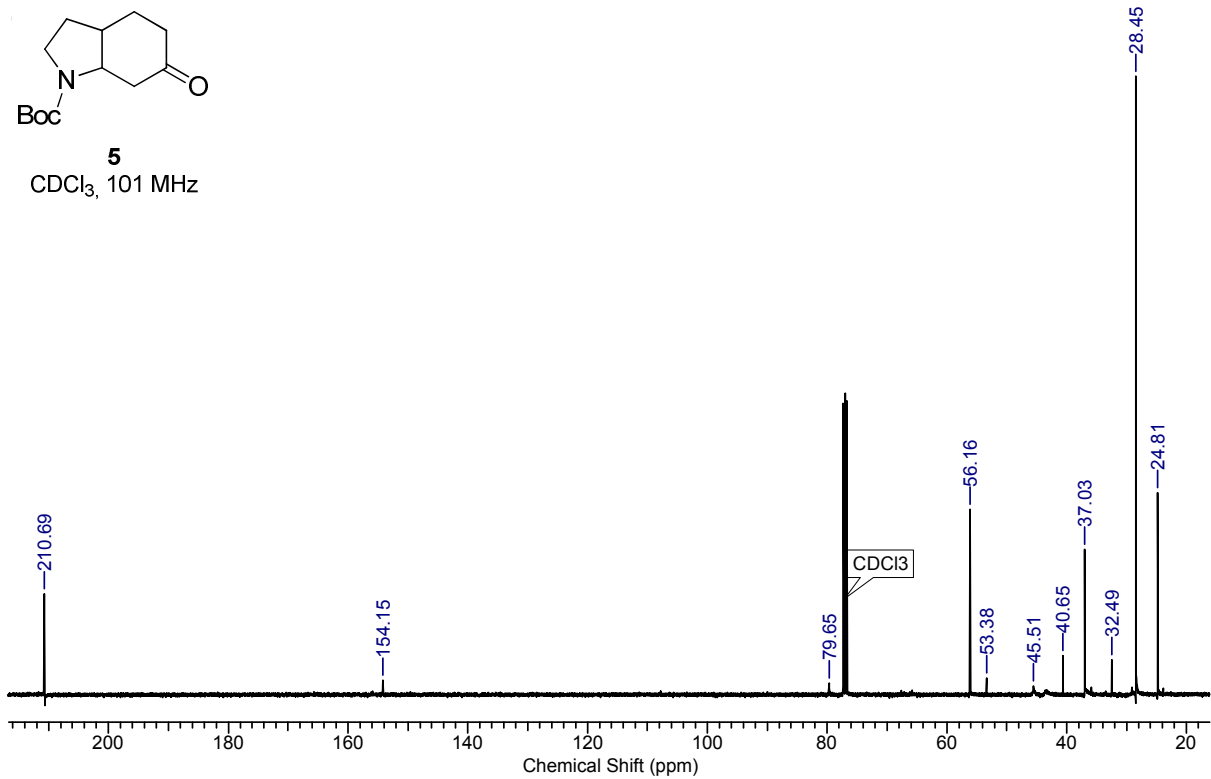



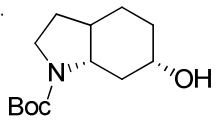

**6**  
CDCl<sub>3</sub>, 400 MHz

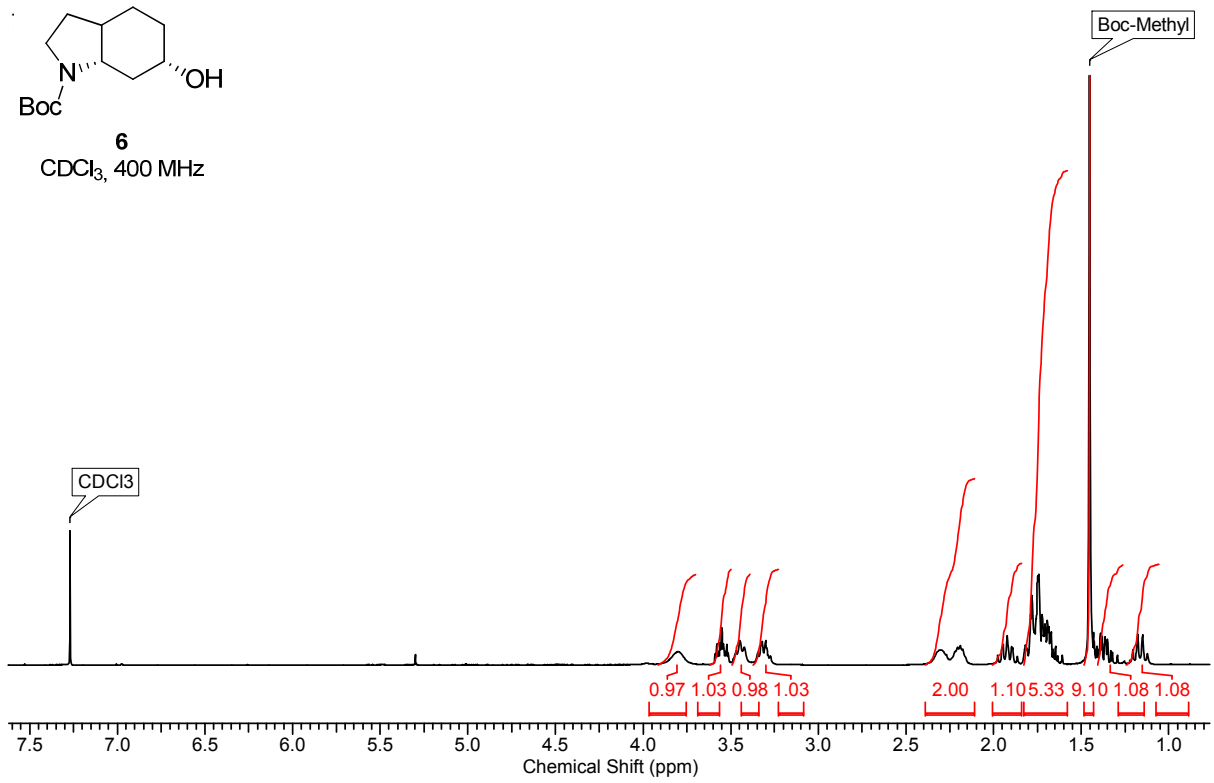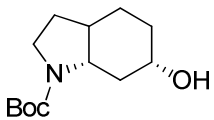

**6**  
CDCl<sub>3</sub>, 101 MHz

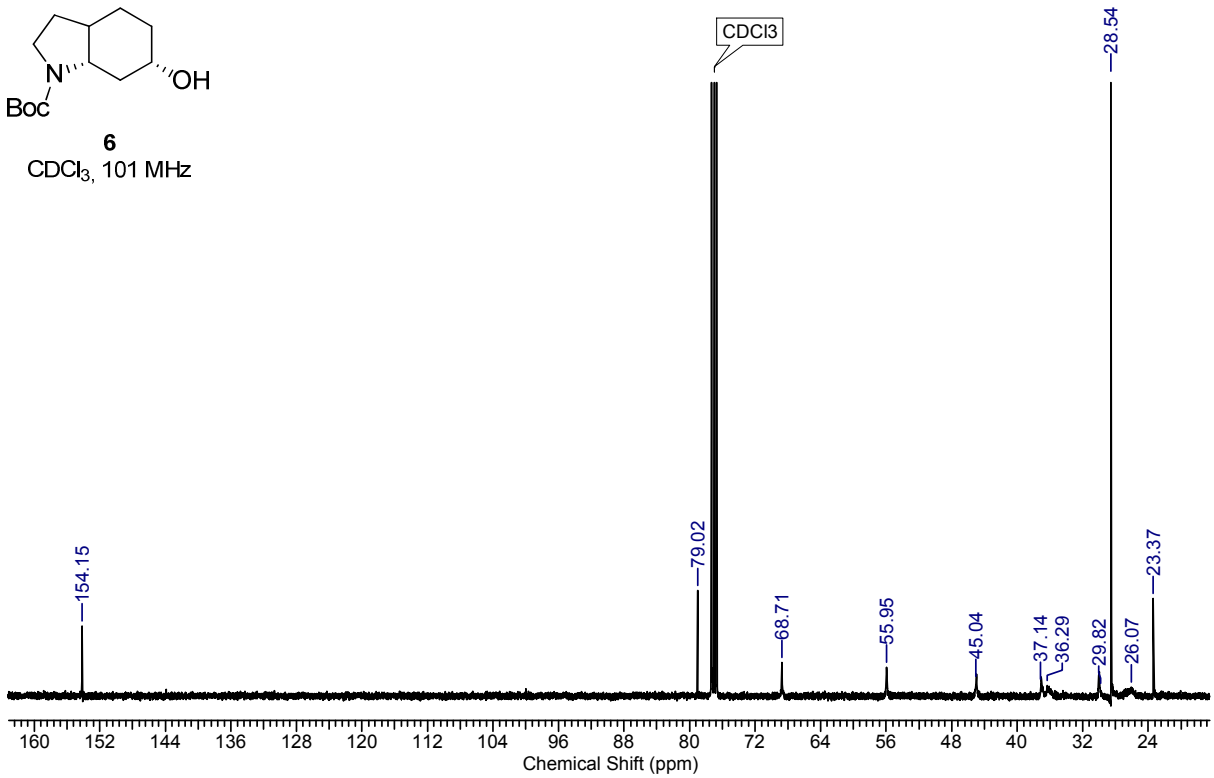

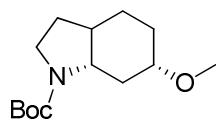

CDCl<sub>3</sub>, 400 MHz

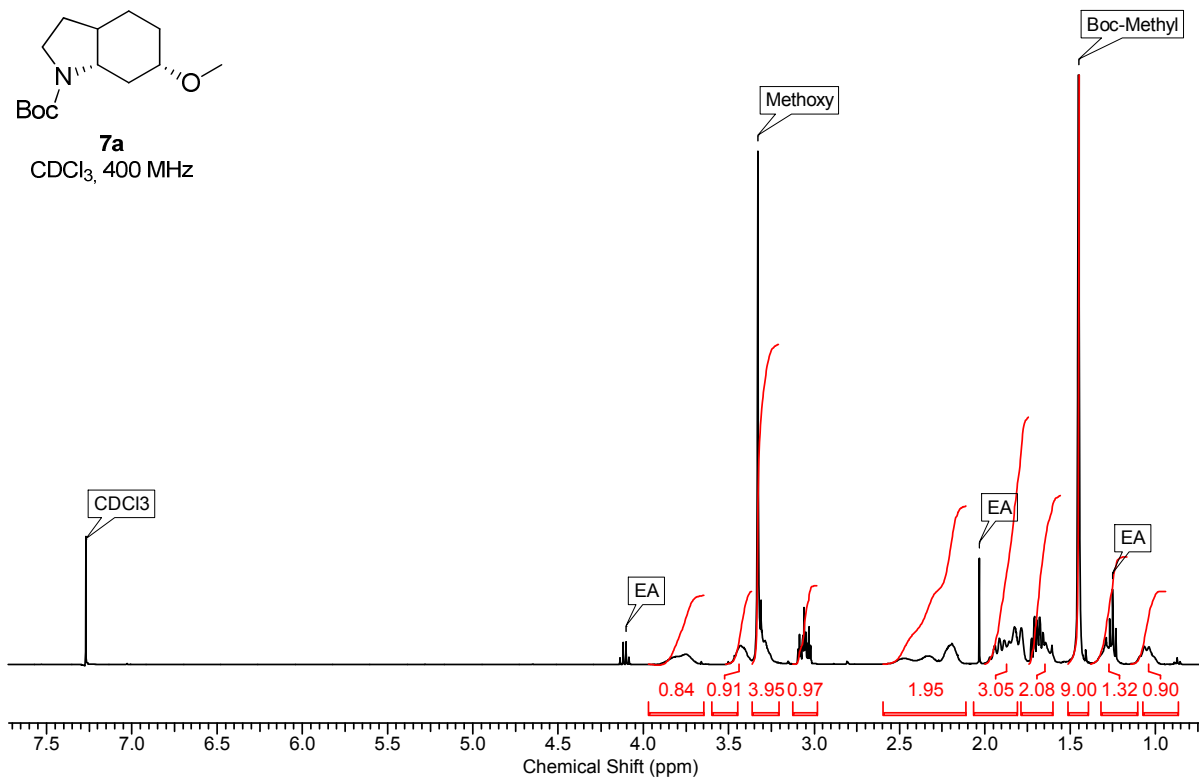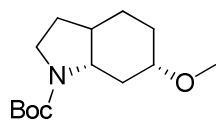

CDCl<sub>3</sub>, 101 MHz

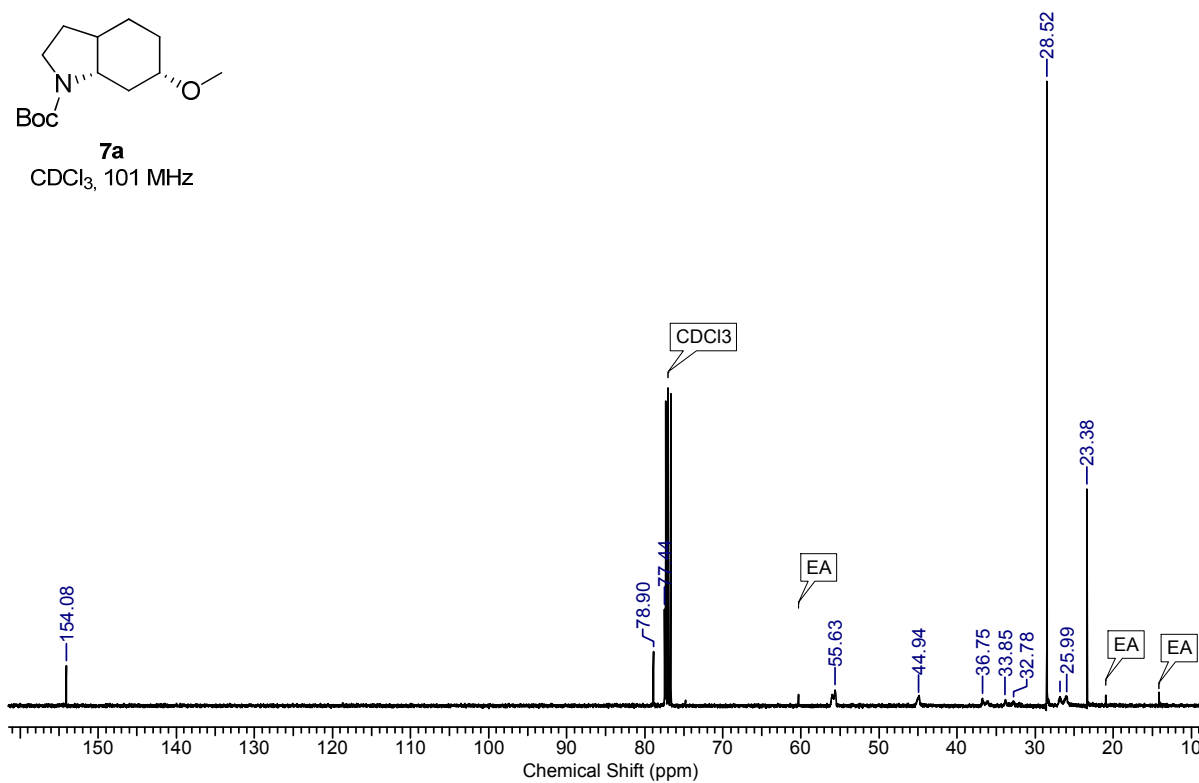

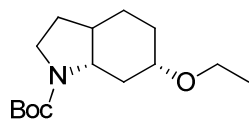

**7b**  
CDCl<sub>3</sub>, 400 MHz

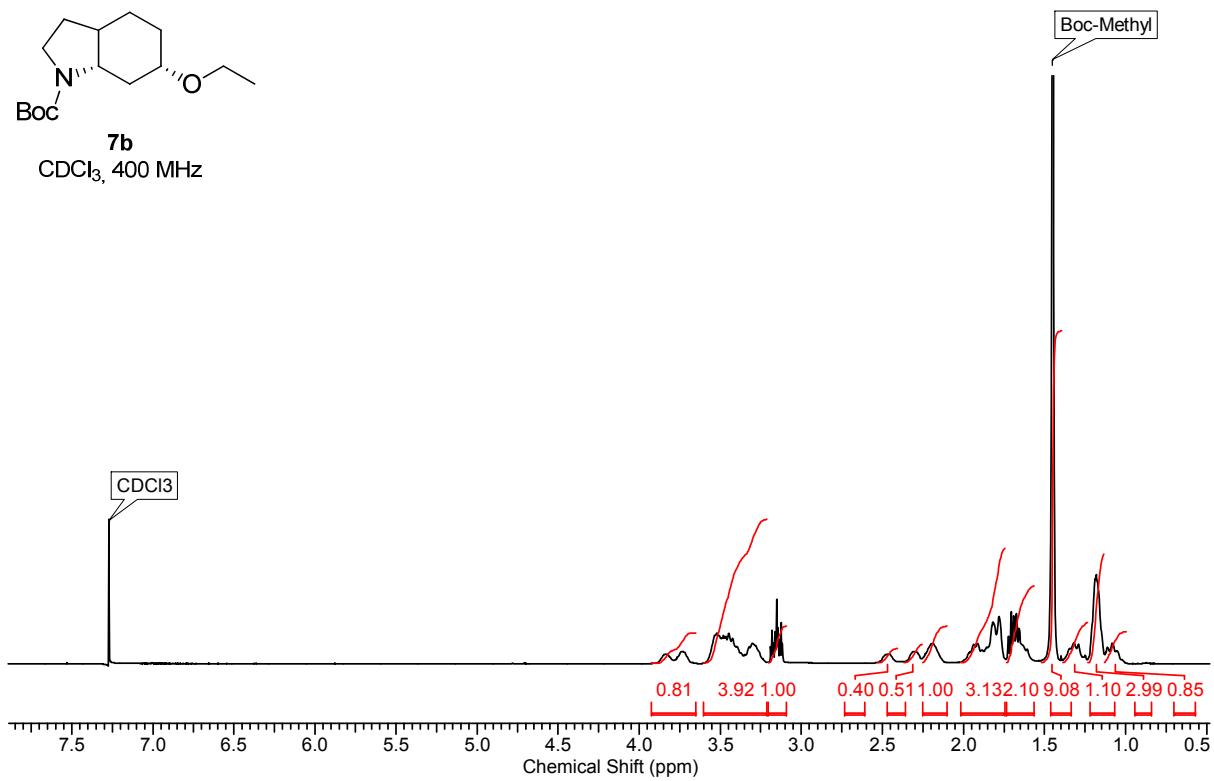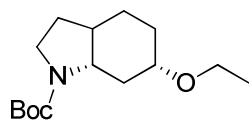

**7b**  
CDCl<sub>3</sub>, 101 MHz

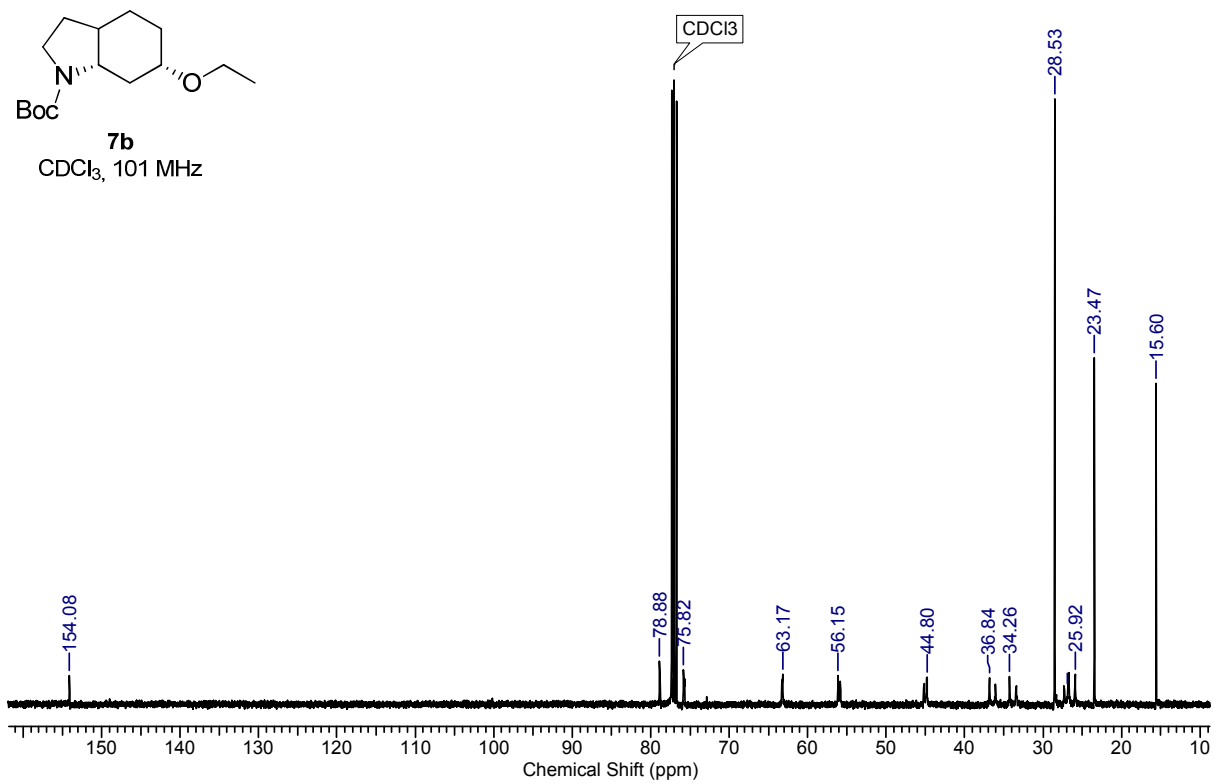

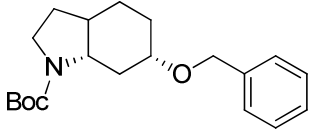

**7c**  
CDCl<sub>3</sub>, 400 MHz

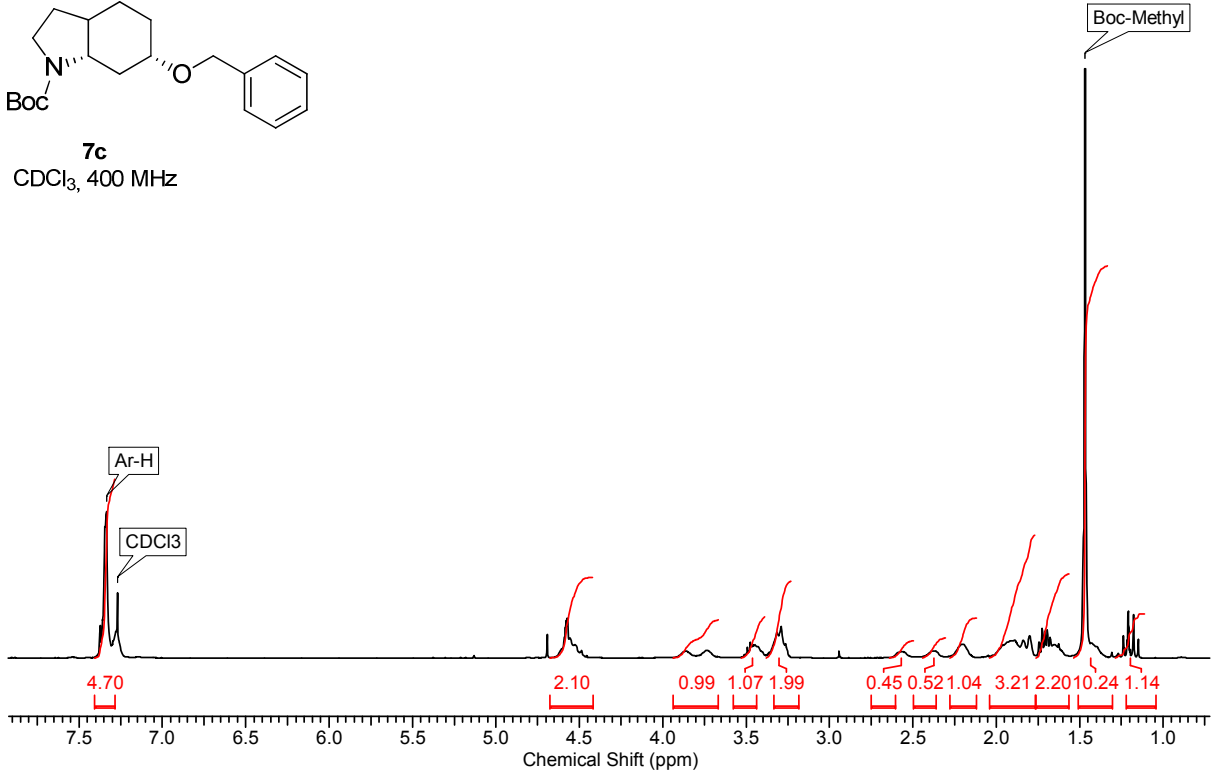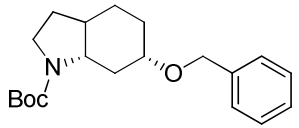

**7c**  
CDCl<sub>3</sub>, 101 MHz

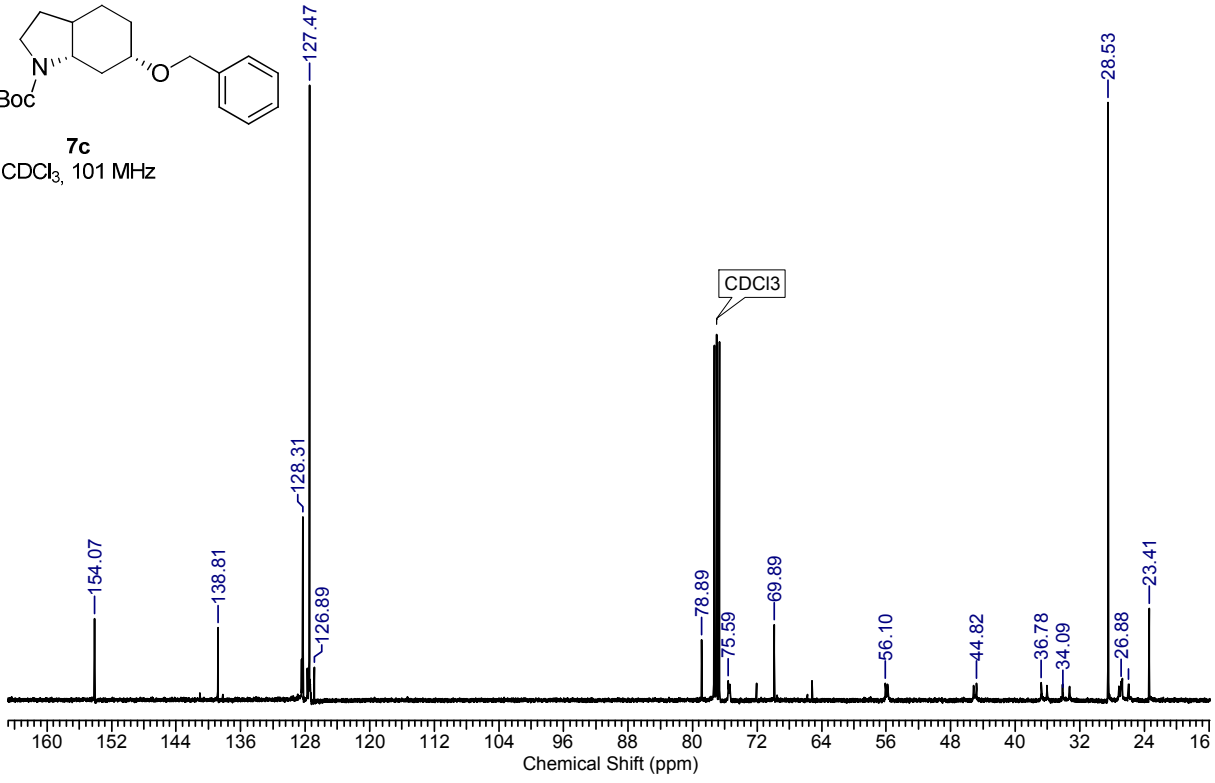

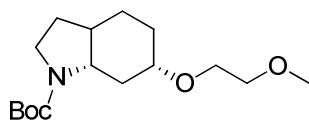

**7d**  
CDCl<sub>3</sub>, 400 MHz

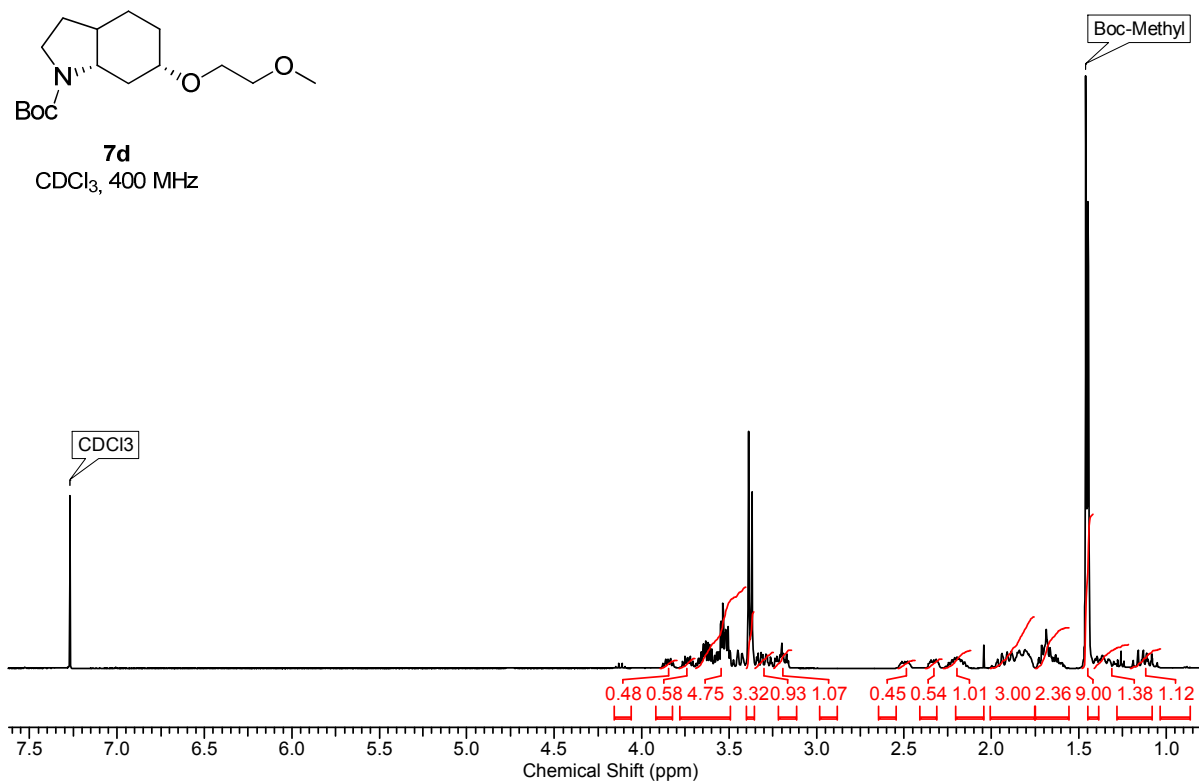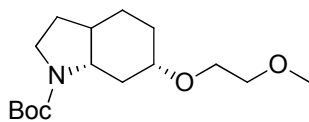

**7d**  
CDCl<sub>3</sub>, 101 MHz

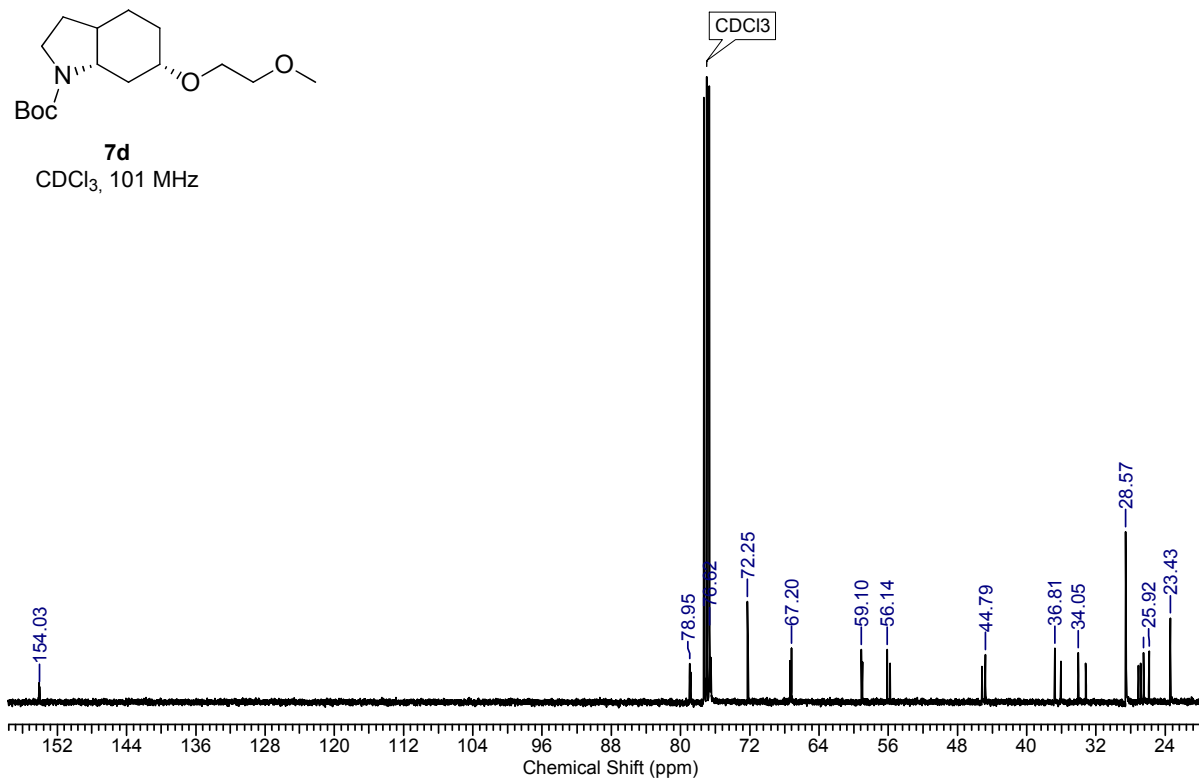



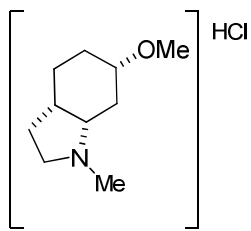

**1a**

DMSO-*d*<sub>6</sub>, 400 MHz

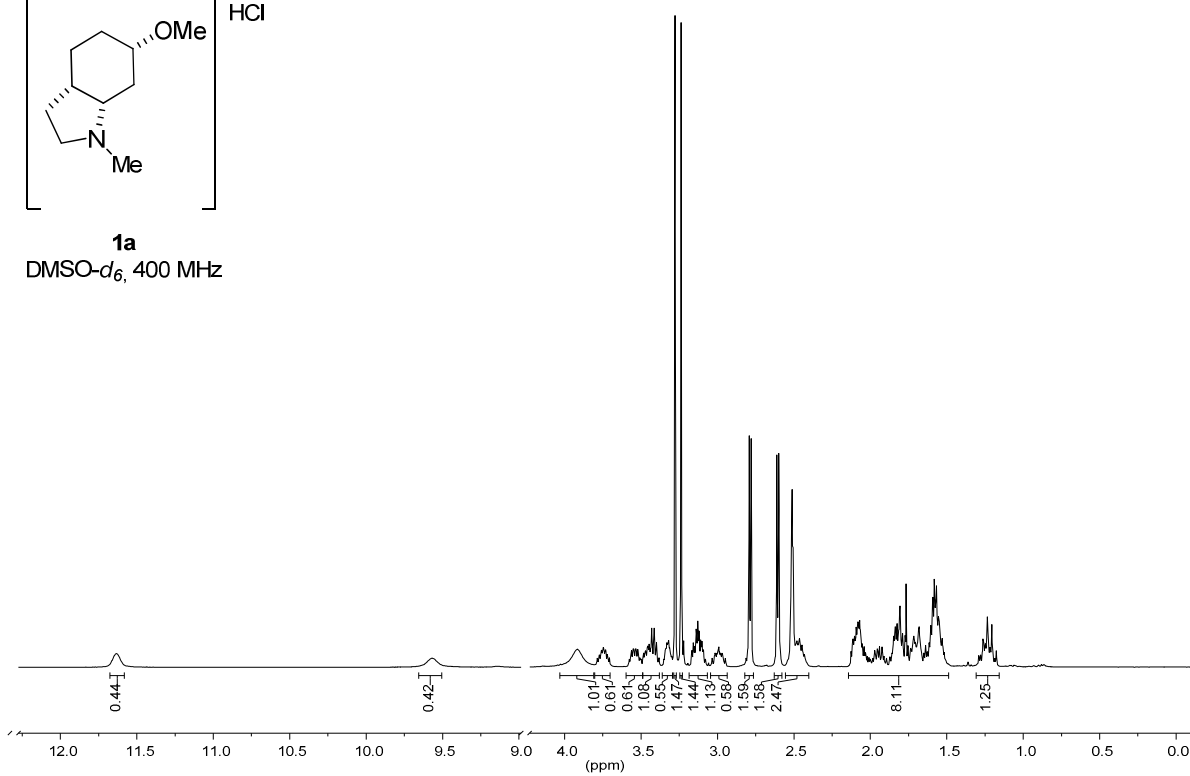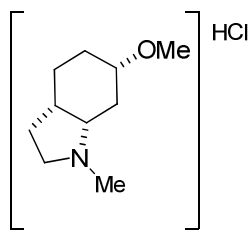

**1a**

DMSO-*d*<sub>6</sub>, 101 MHz

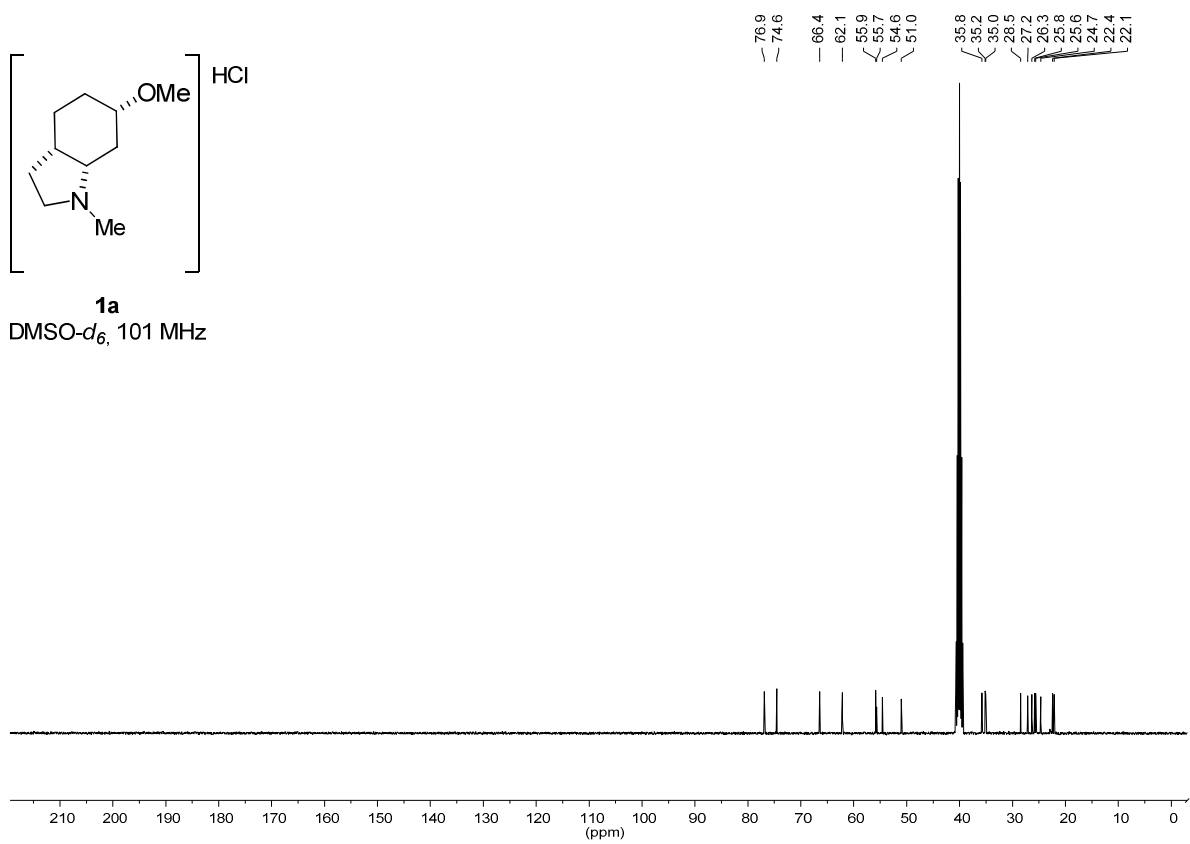

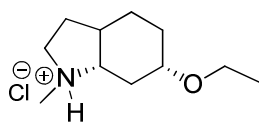

**1b**  
DMSO-d<sub>6</sub>, 400 MHz

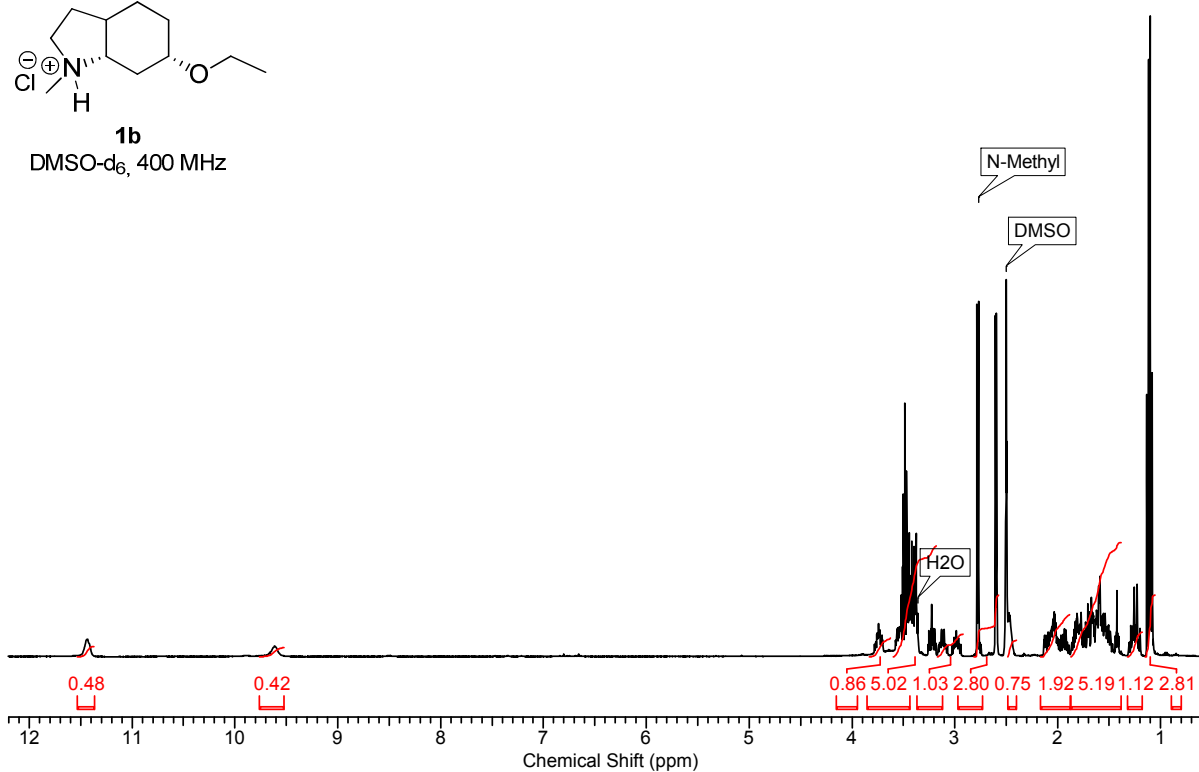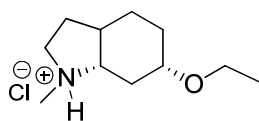

**1b**  
DMSO-d<sub>6</sub>, 101 MHz

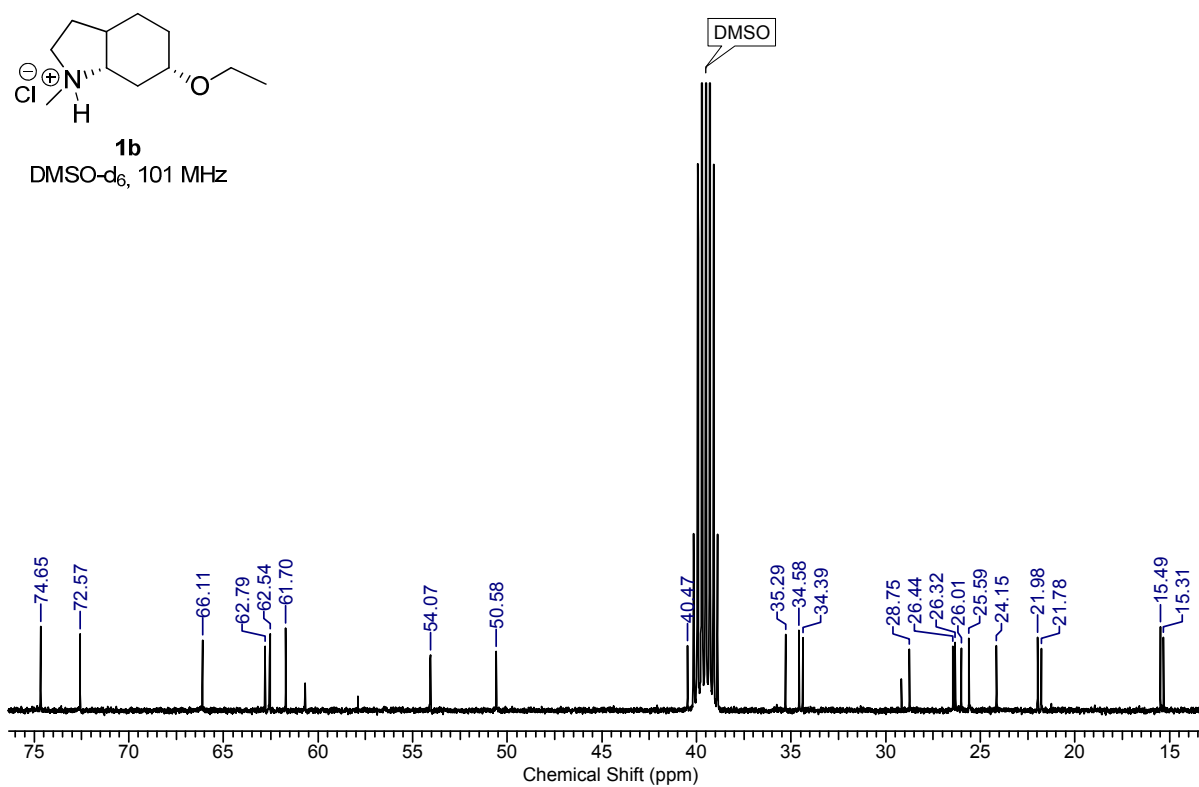



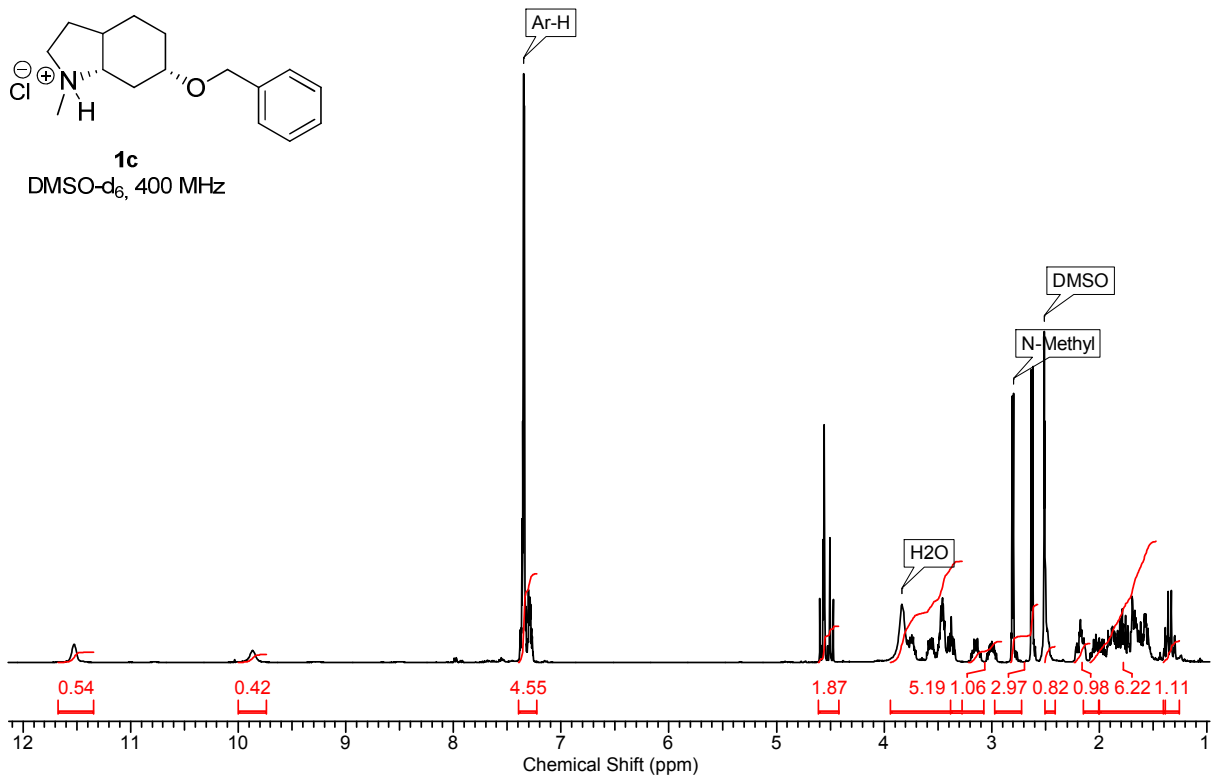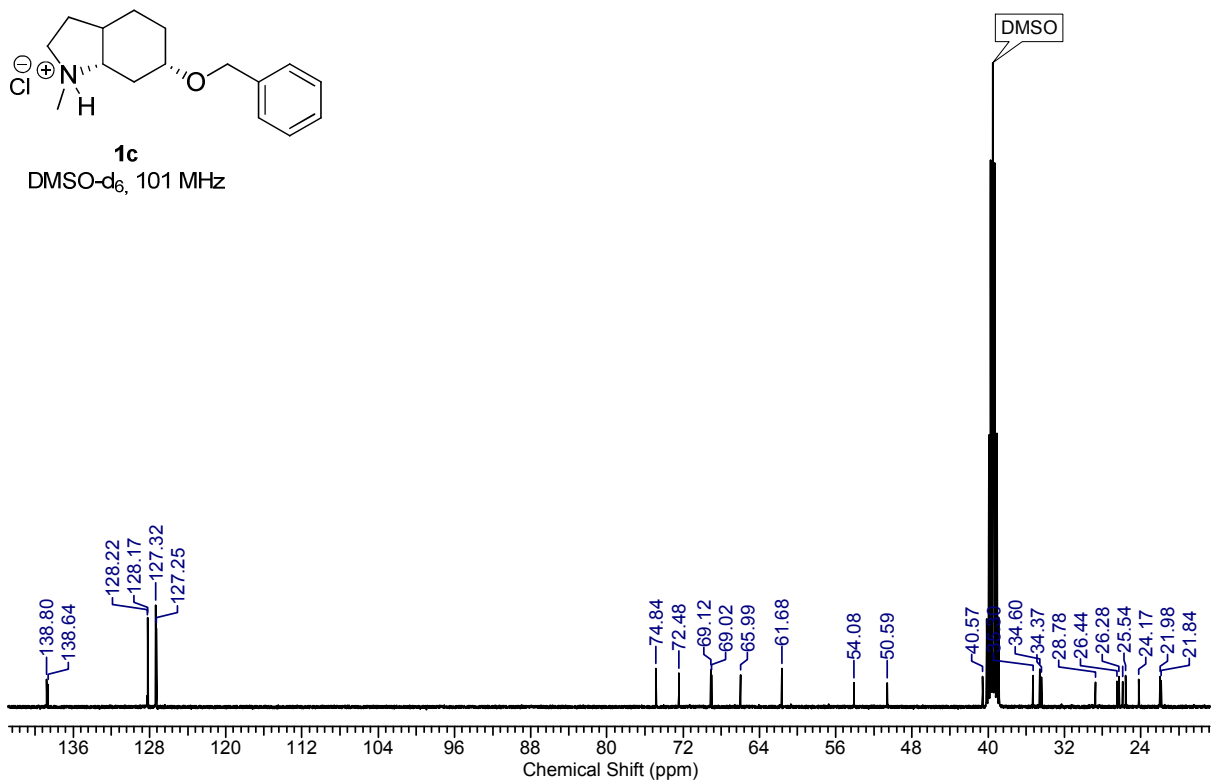

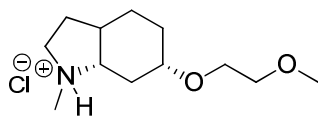

**1d**  
DMSO-d<sub>6</sub>, 400 MHz

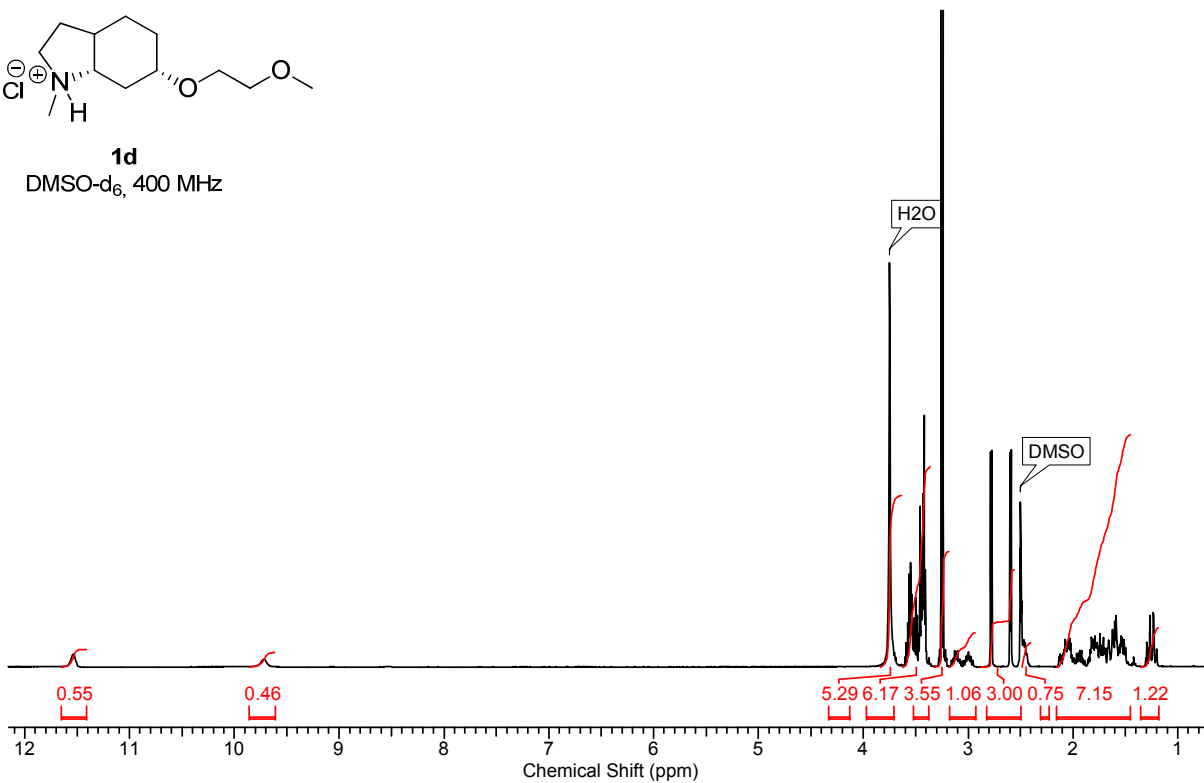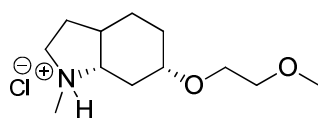

**1d**  
DMSO-d<sub>6</sub>, 101 MHz

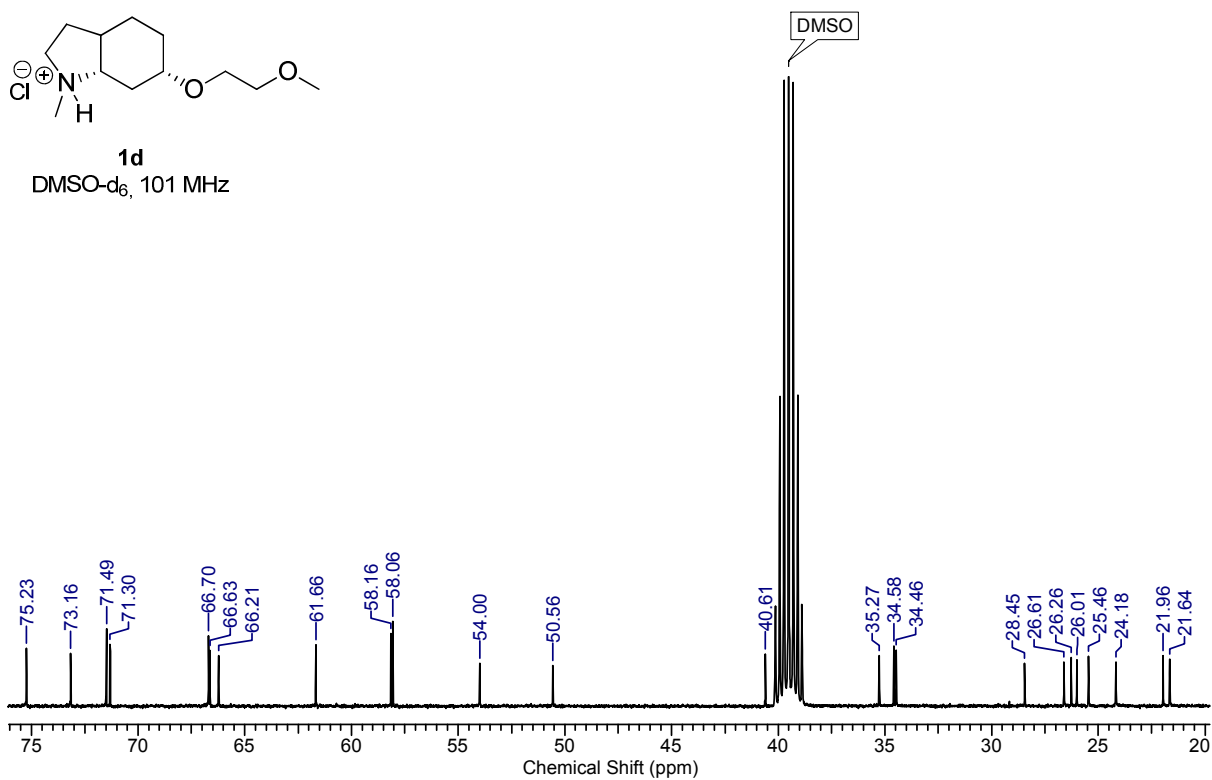

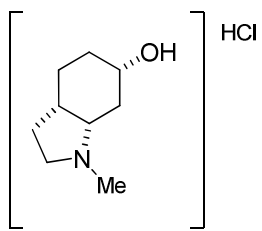

**8**

DMSO-d<sub>6</sub>, 400 MHz

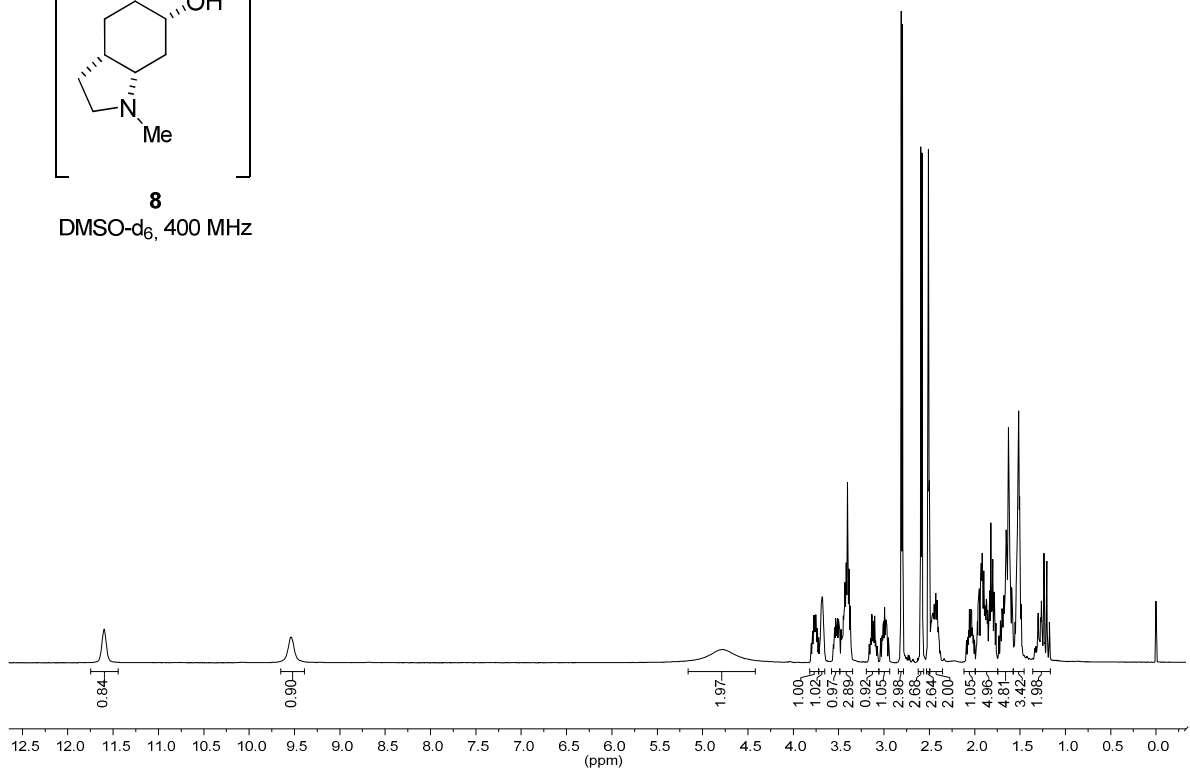

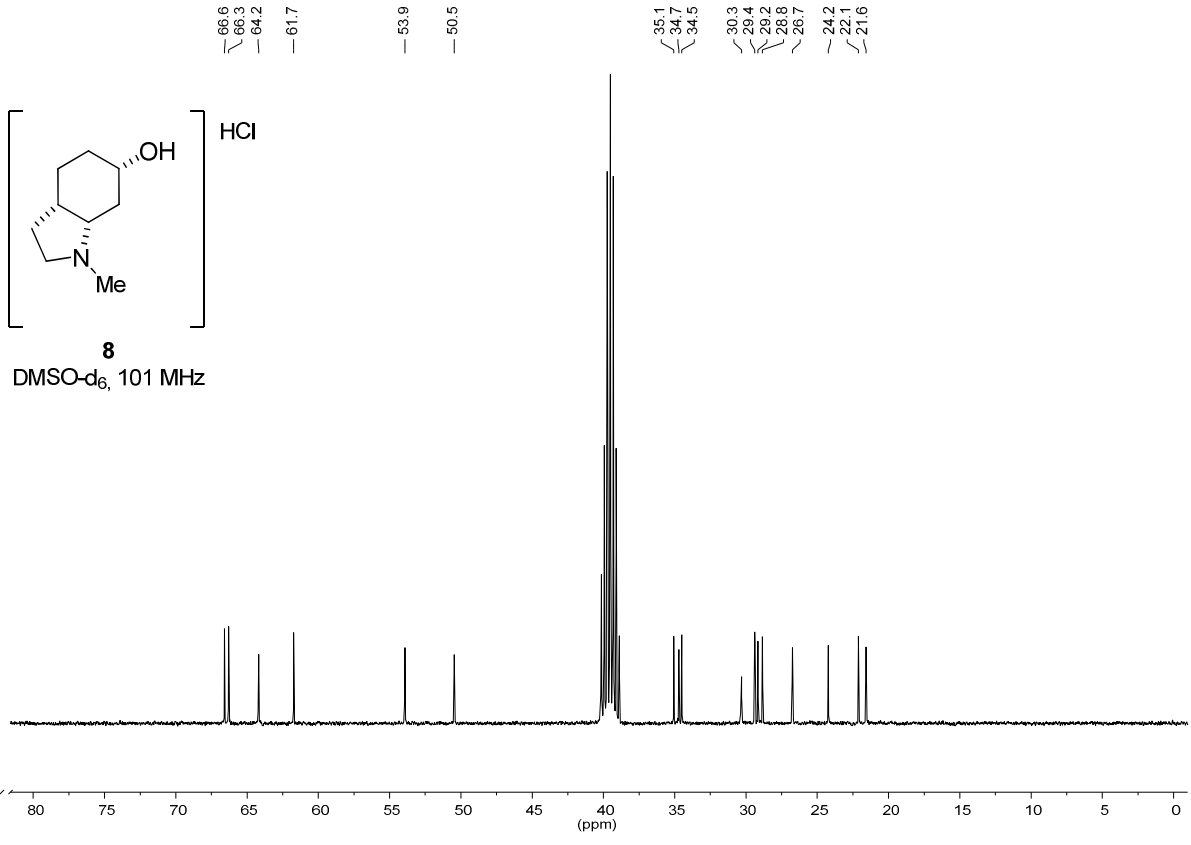

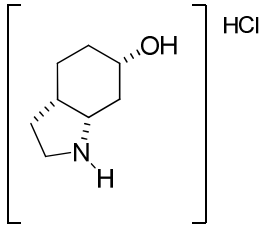

**9**  
DMSO-d<sub>6</sub>, 400 MHz

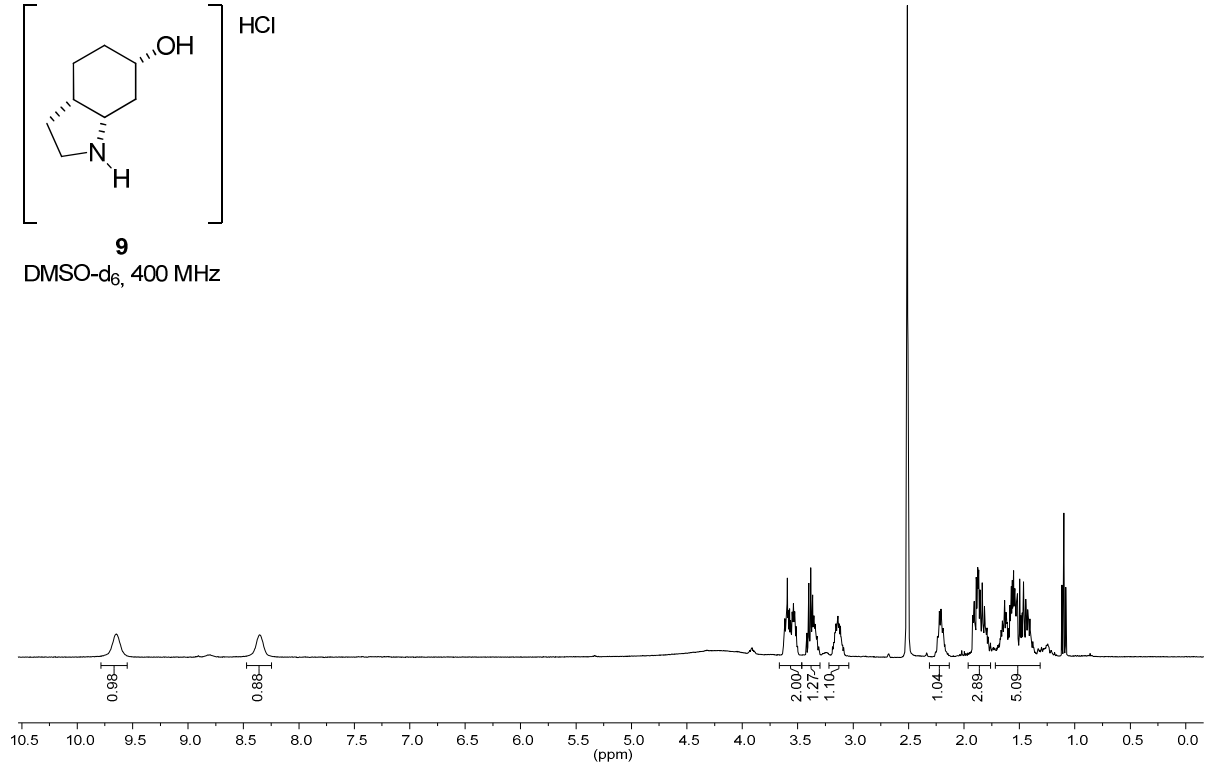

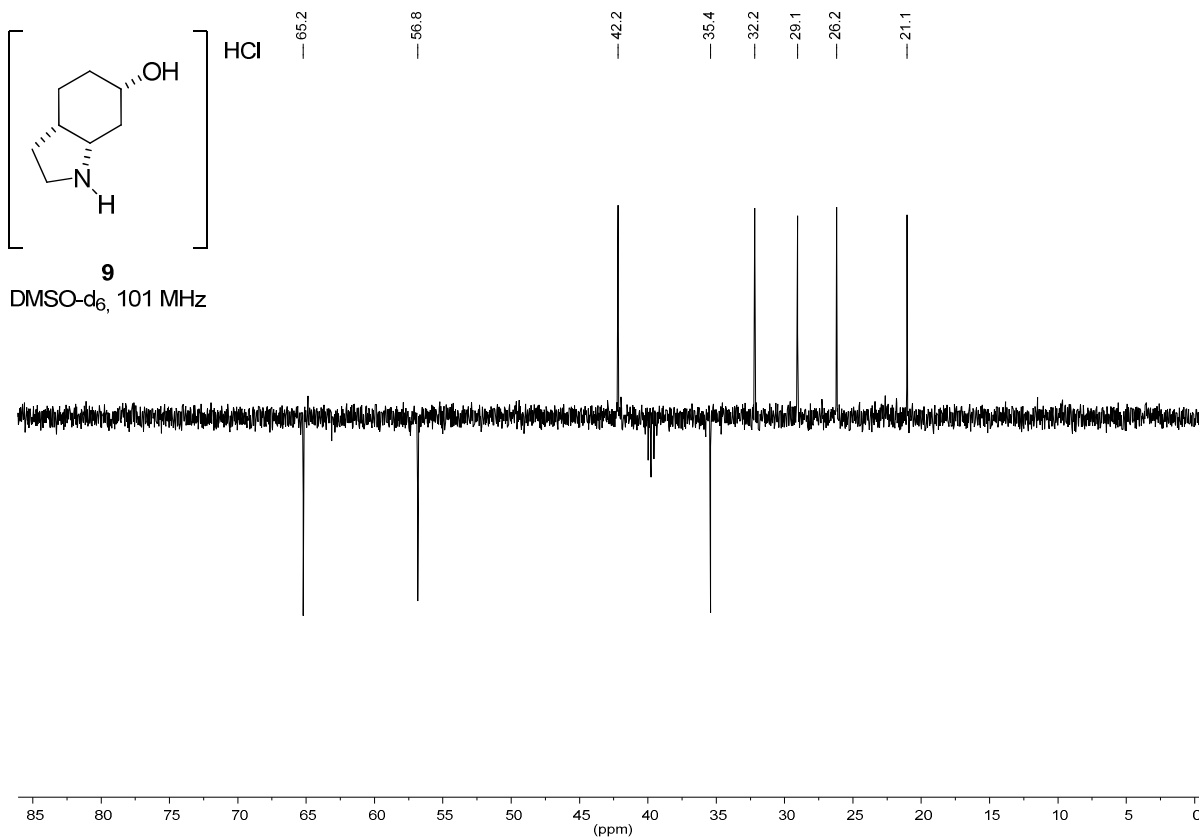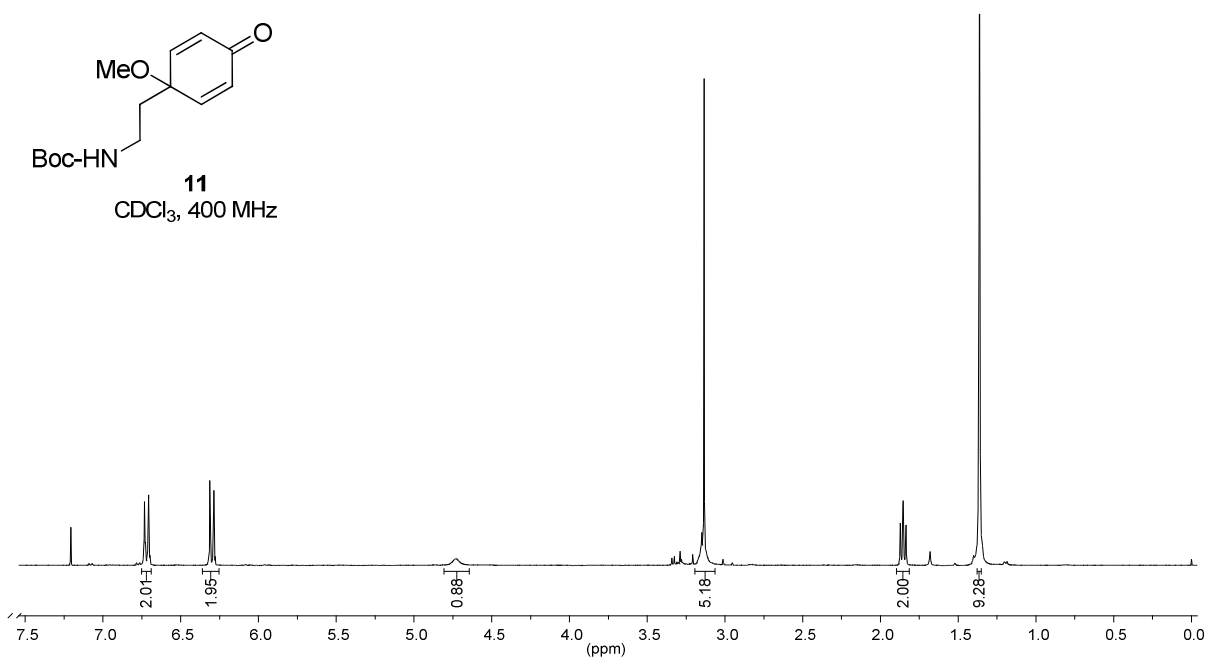

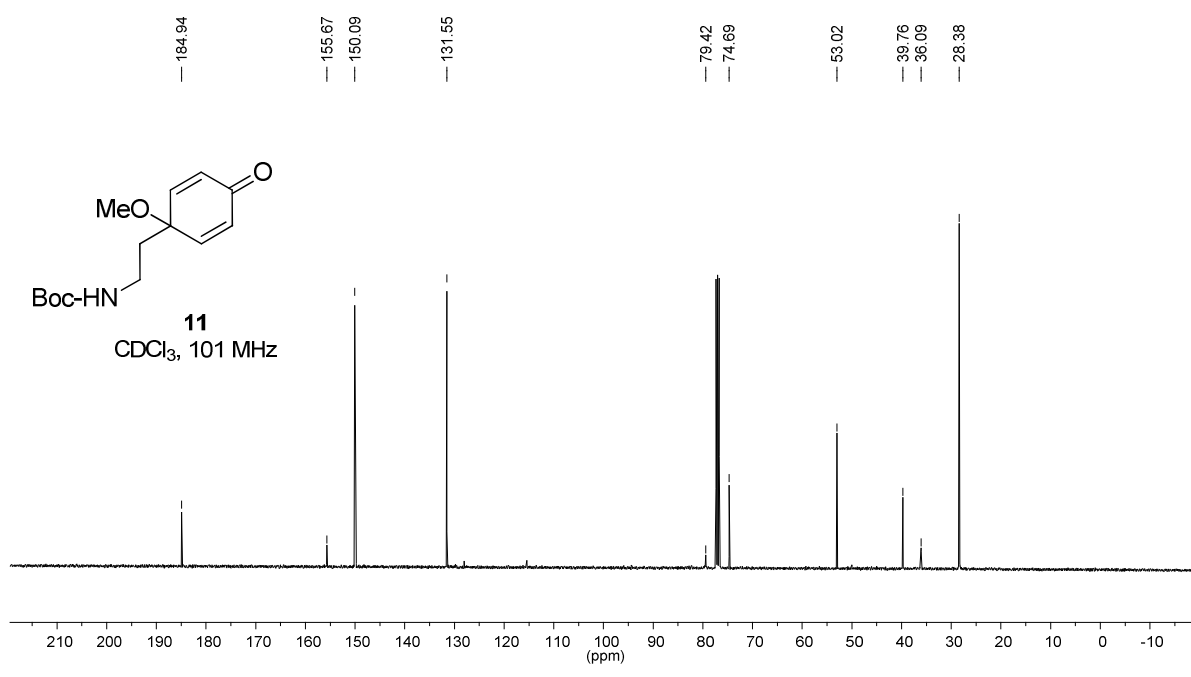

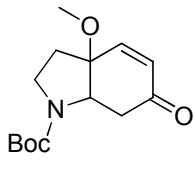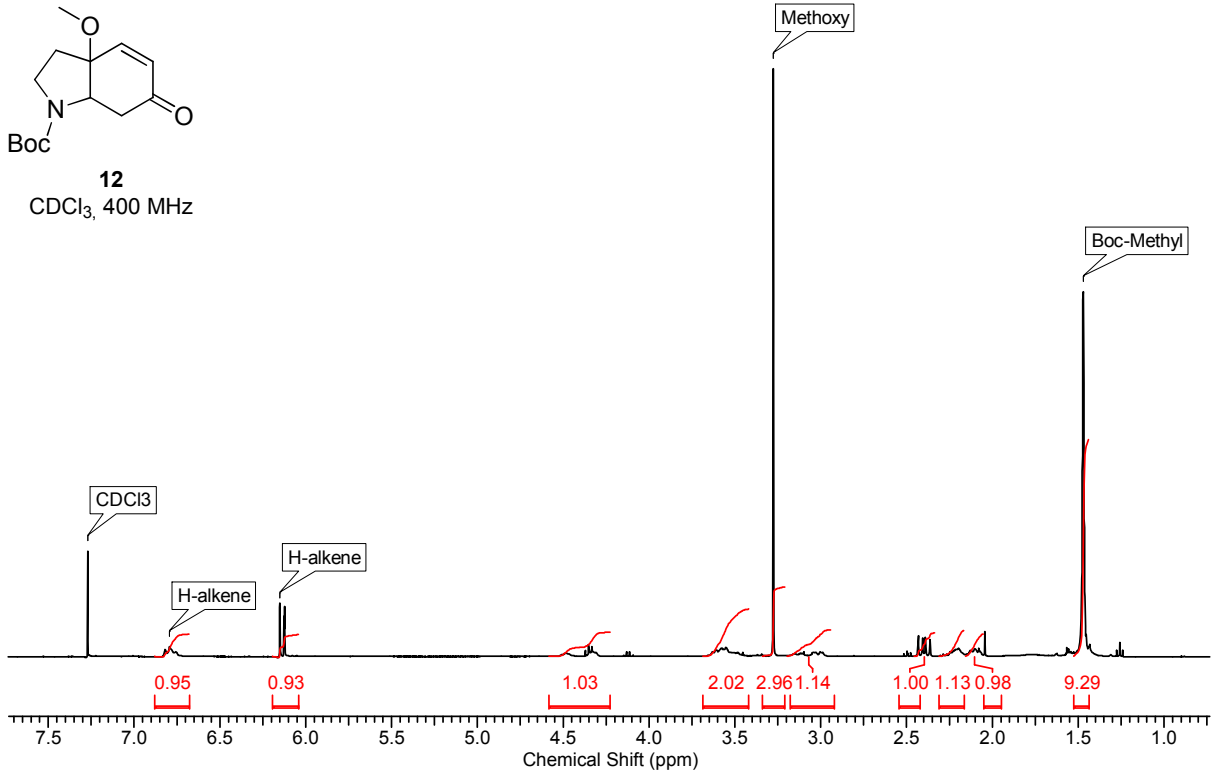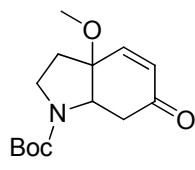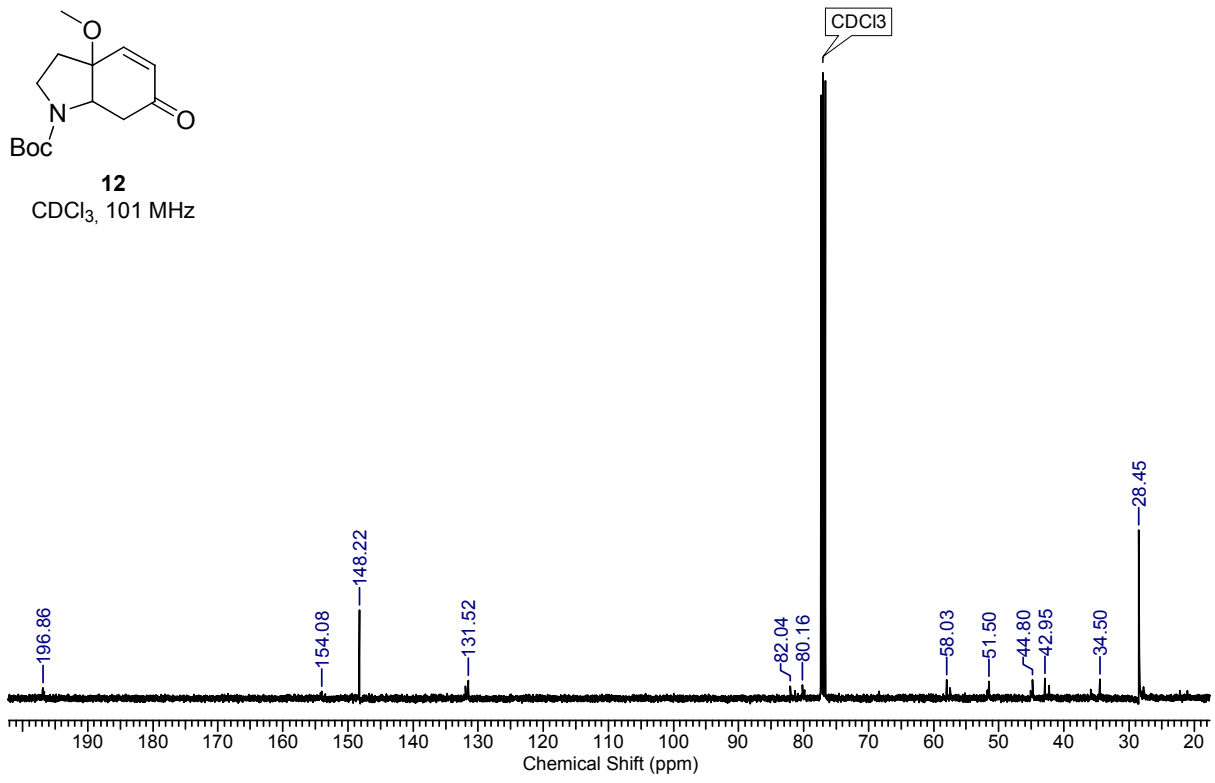



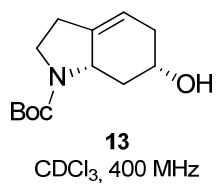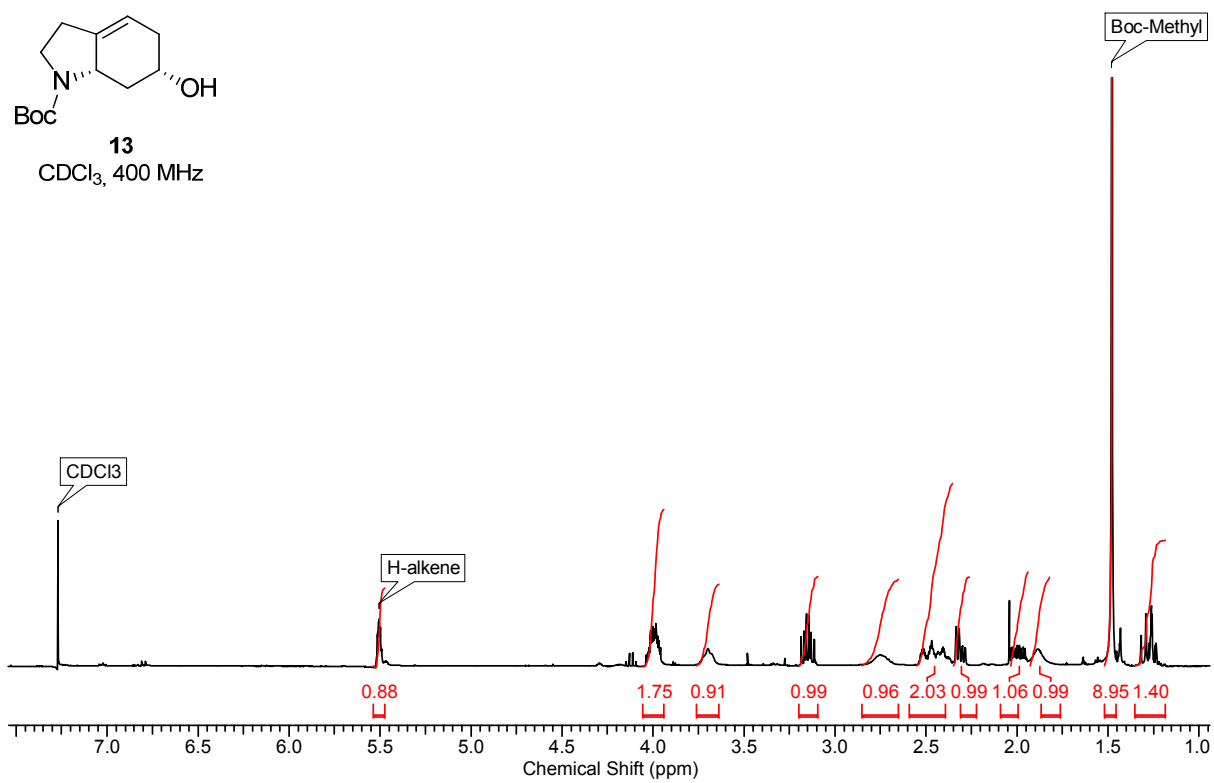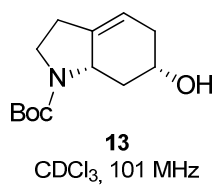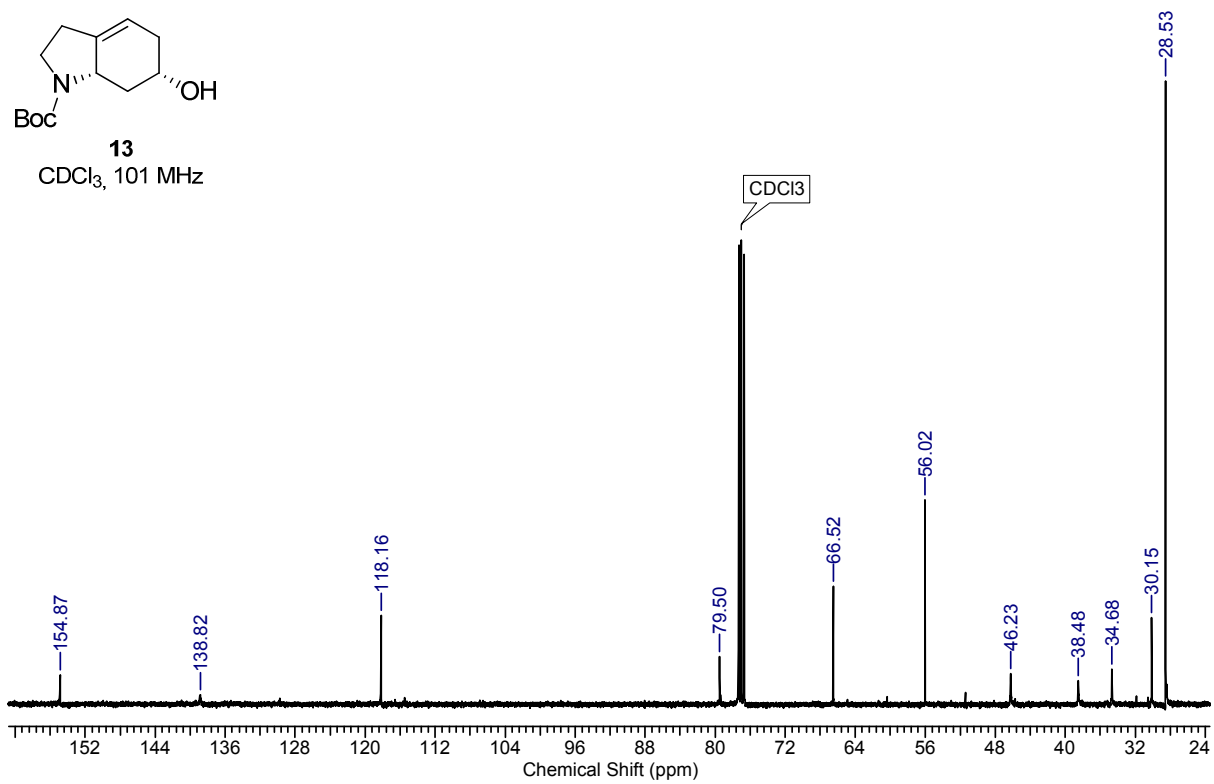

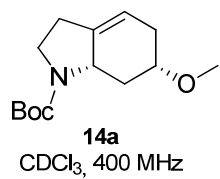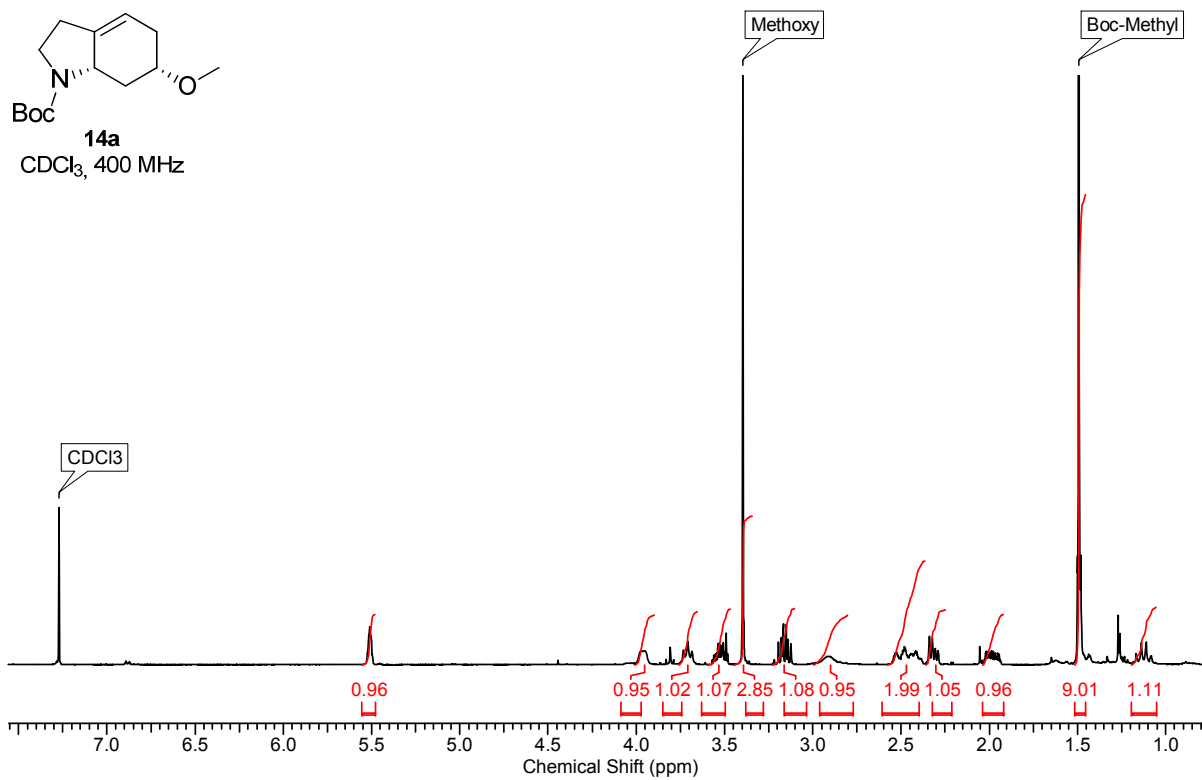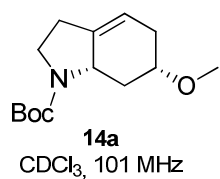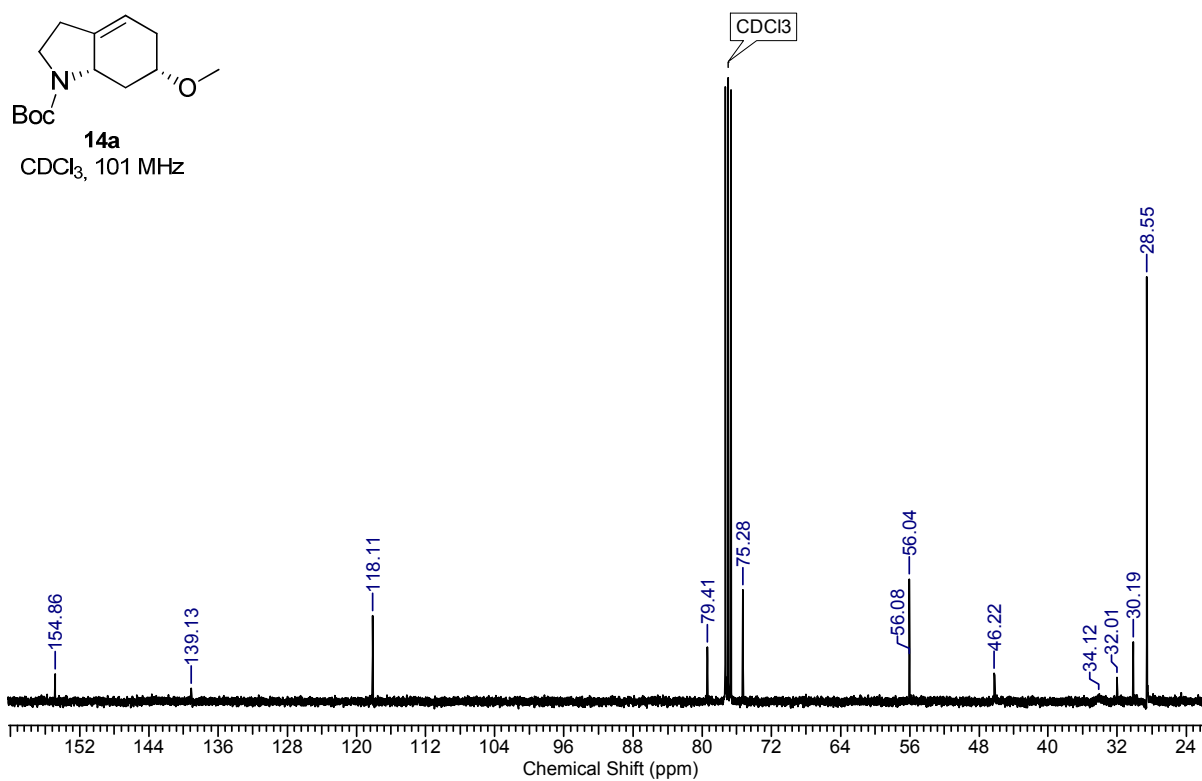

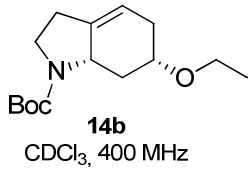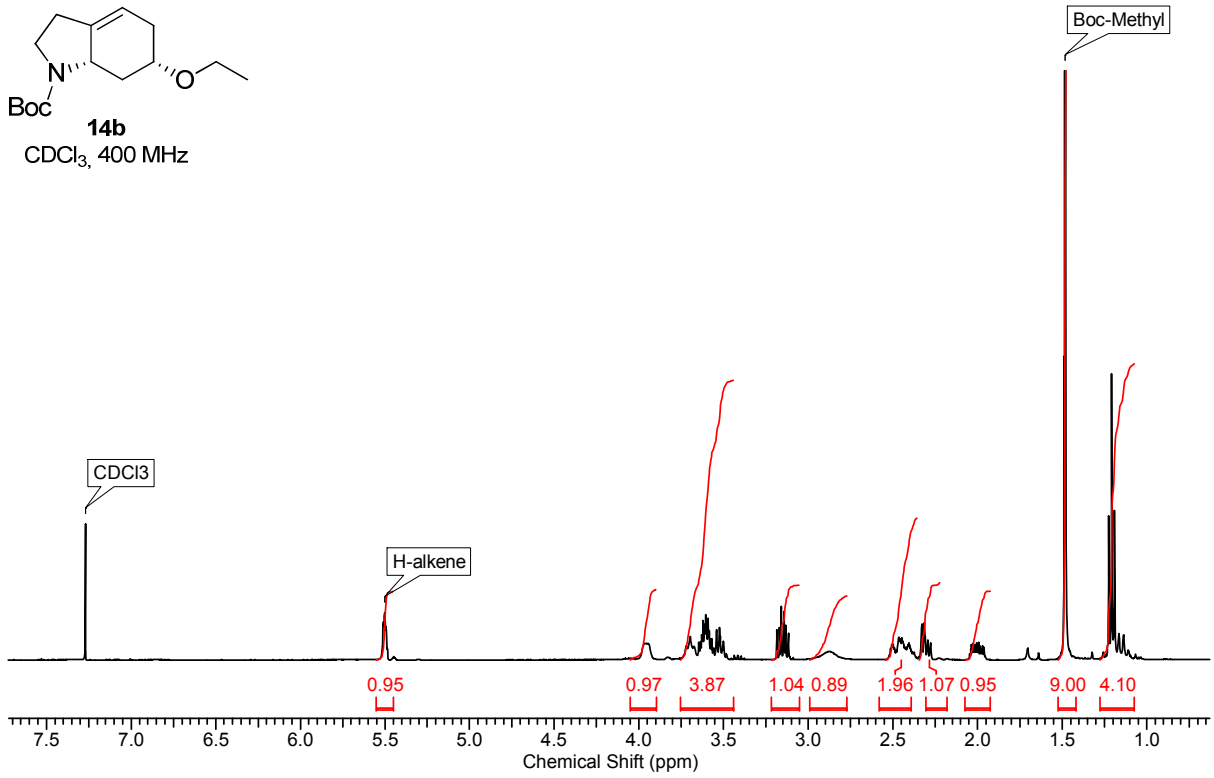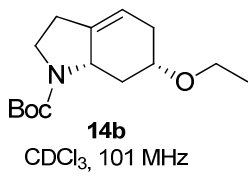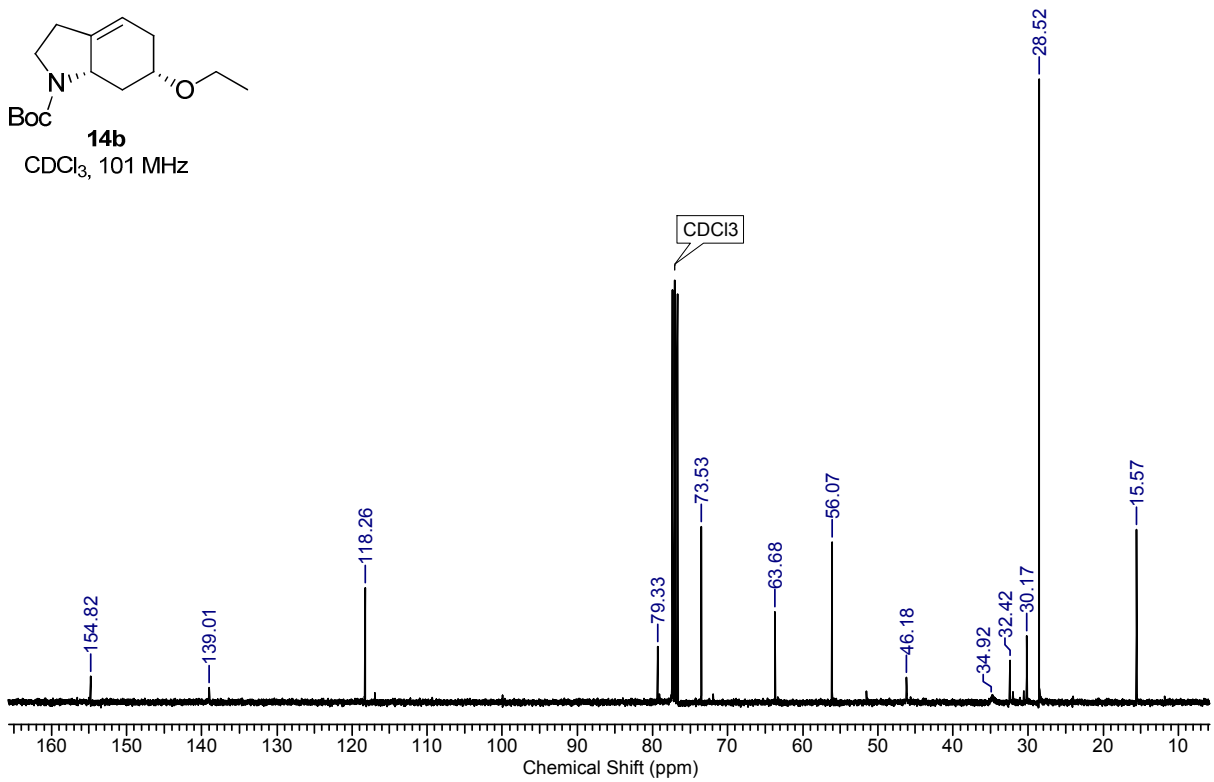

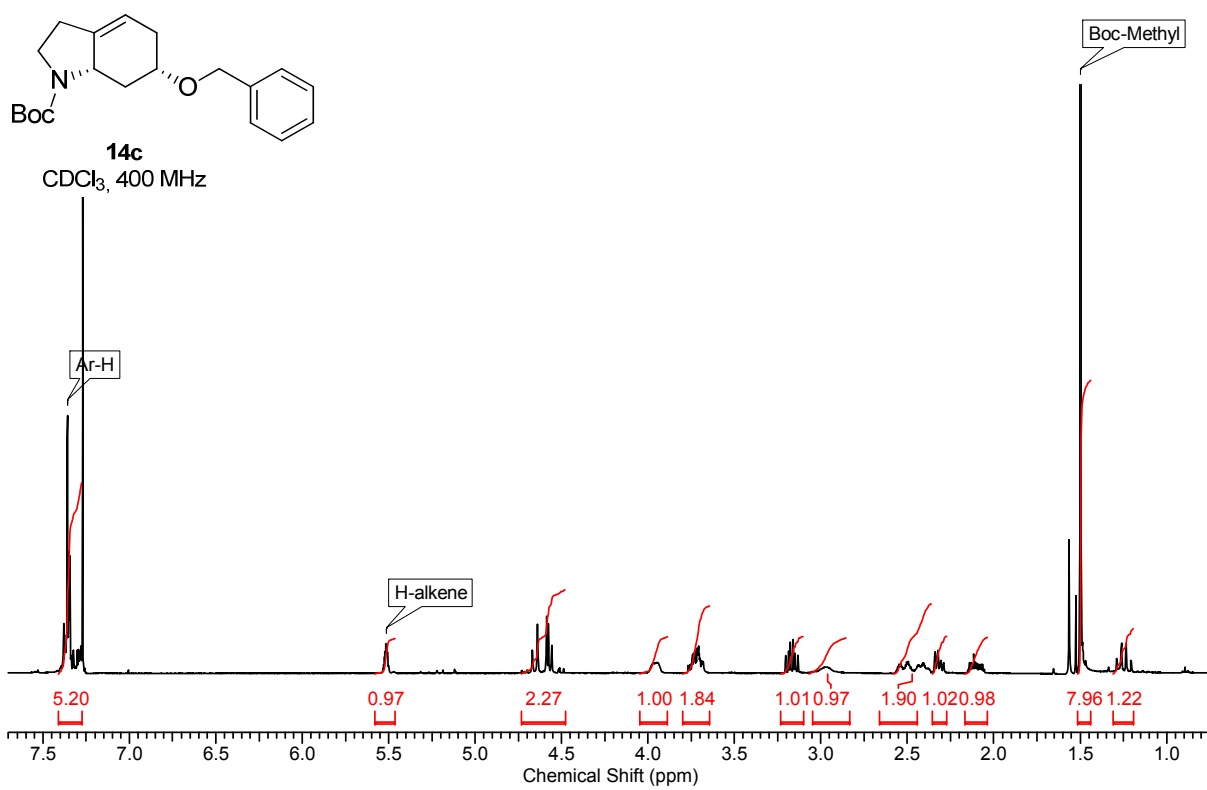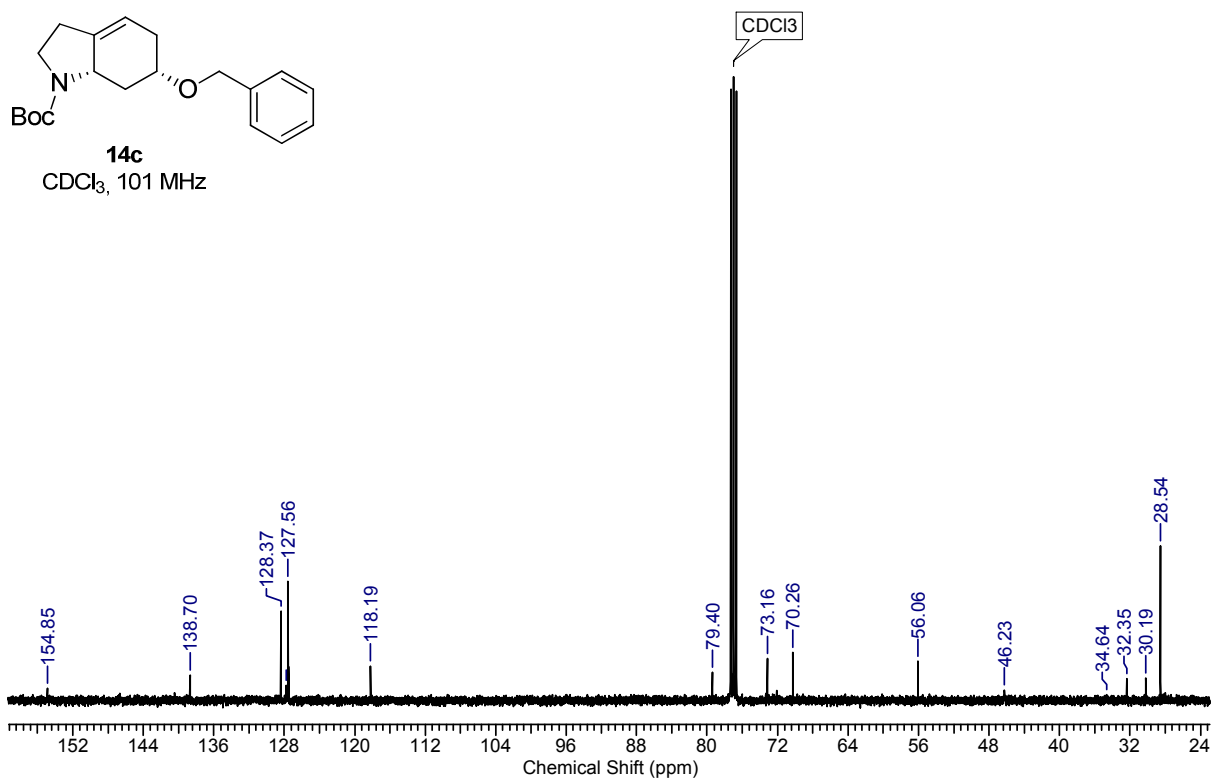

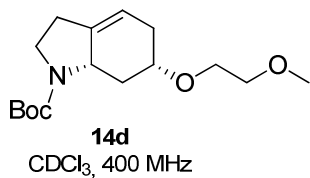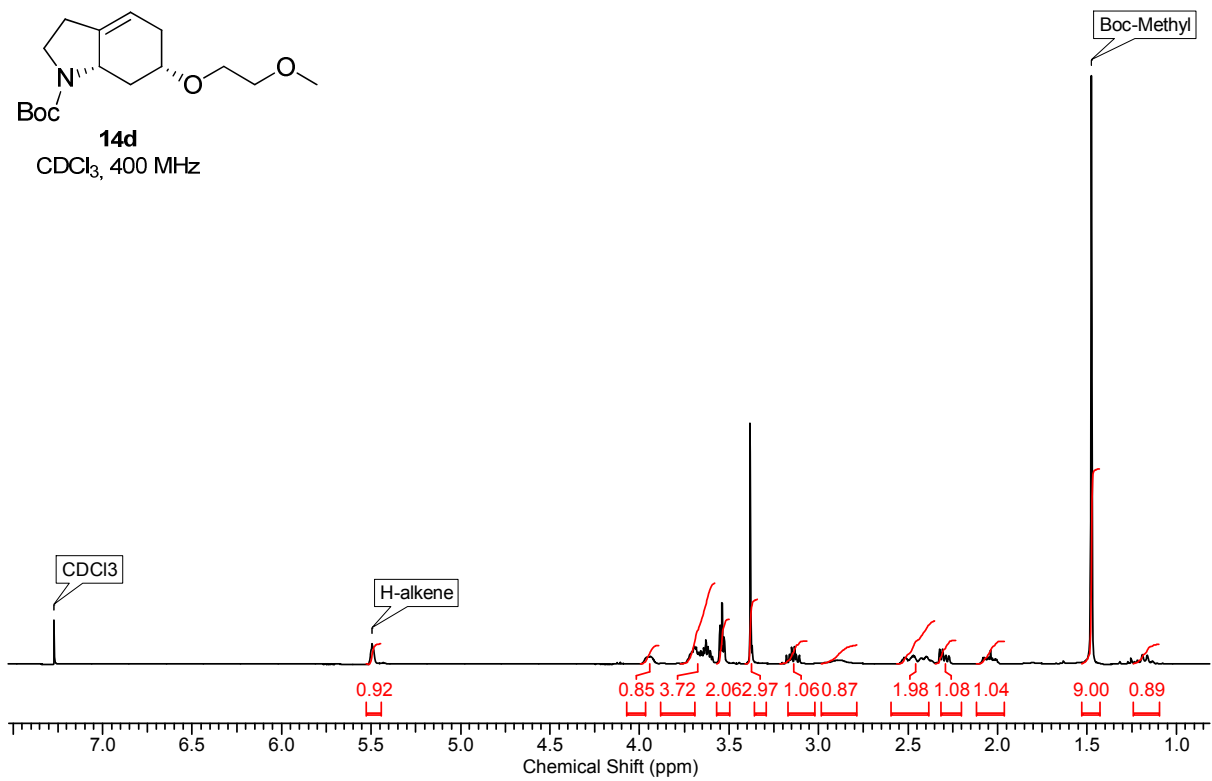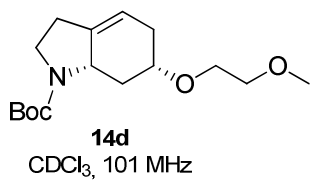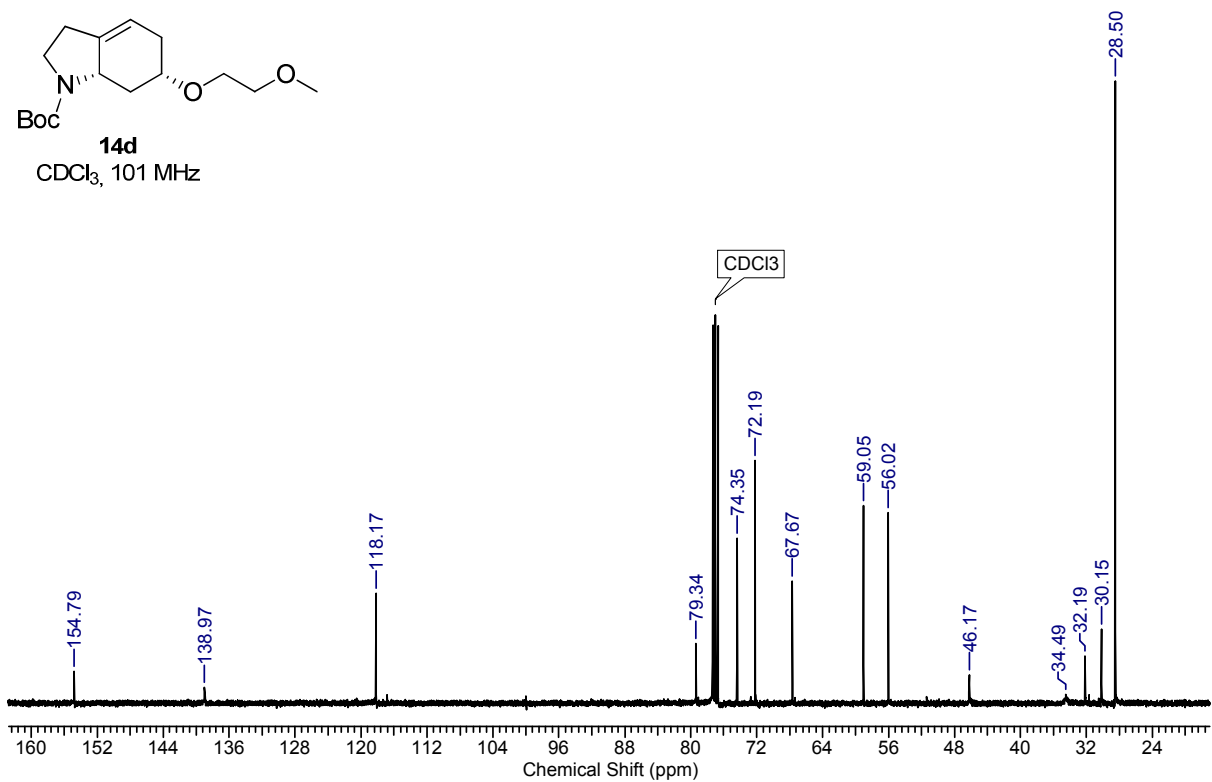

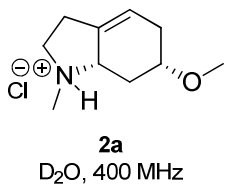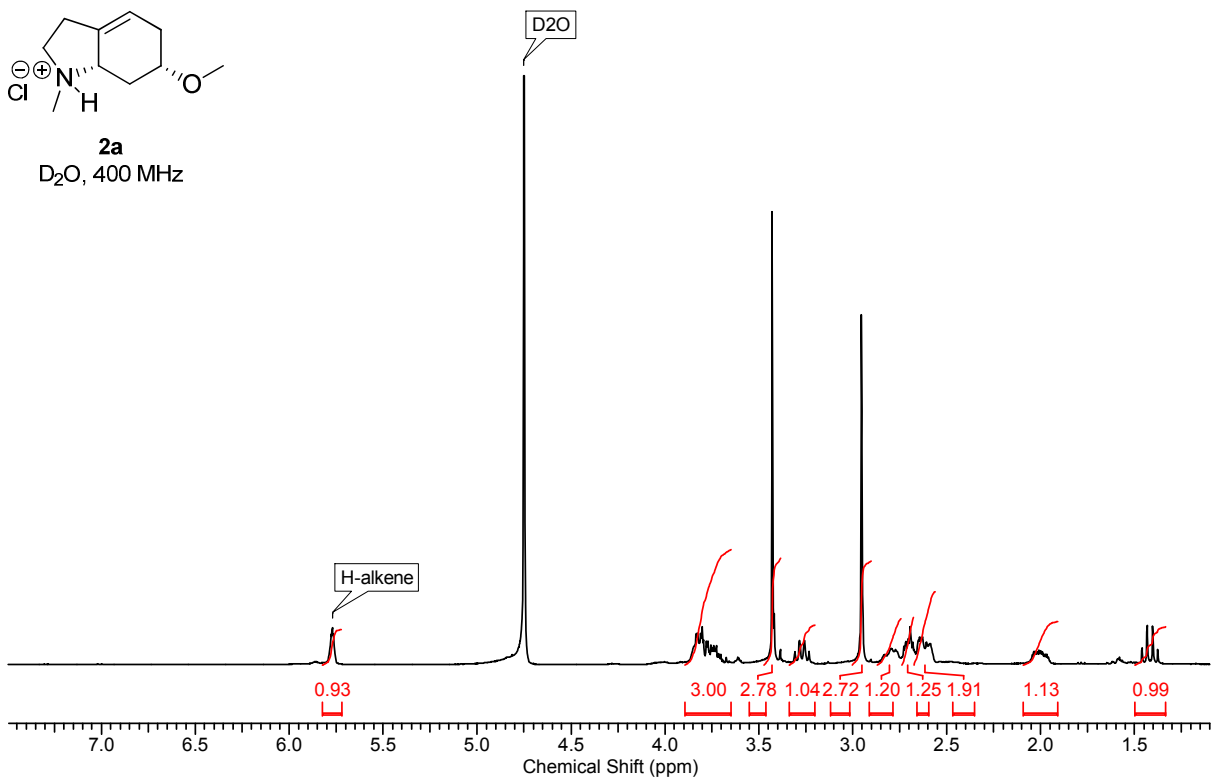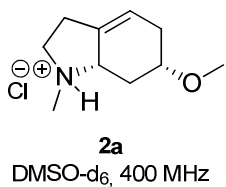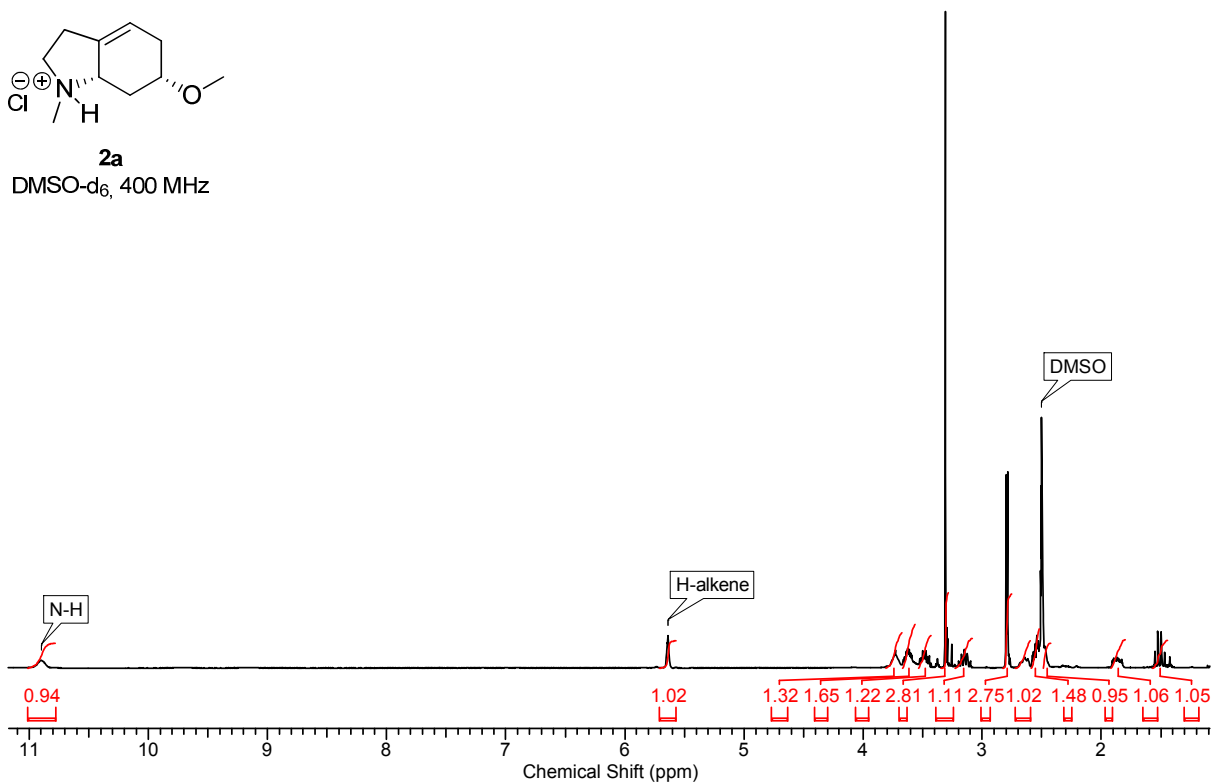

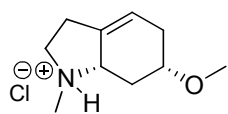

**2a**

DMSO-d<sub>6</sub>, 101 MHz

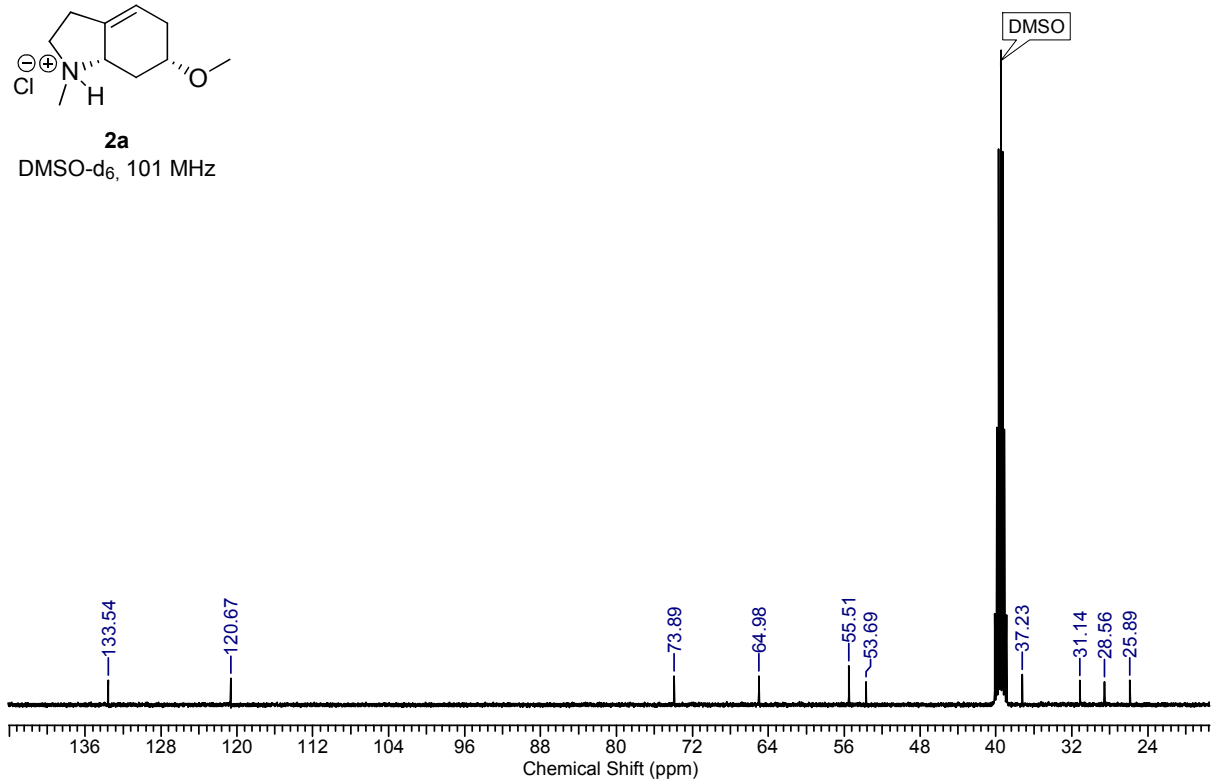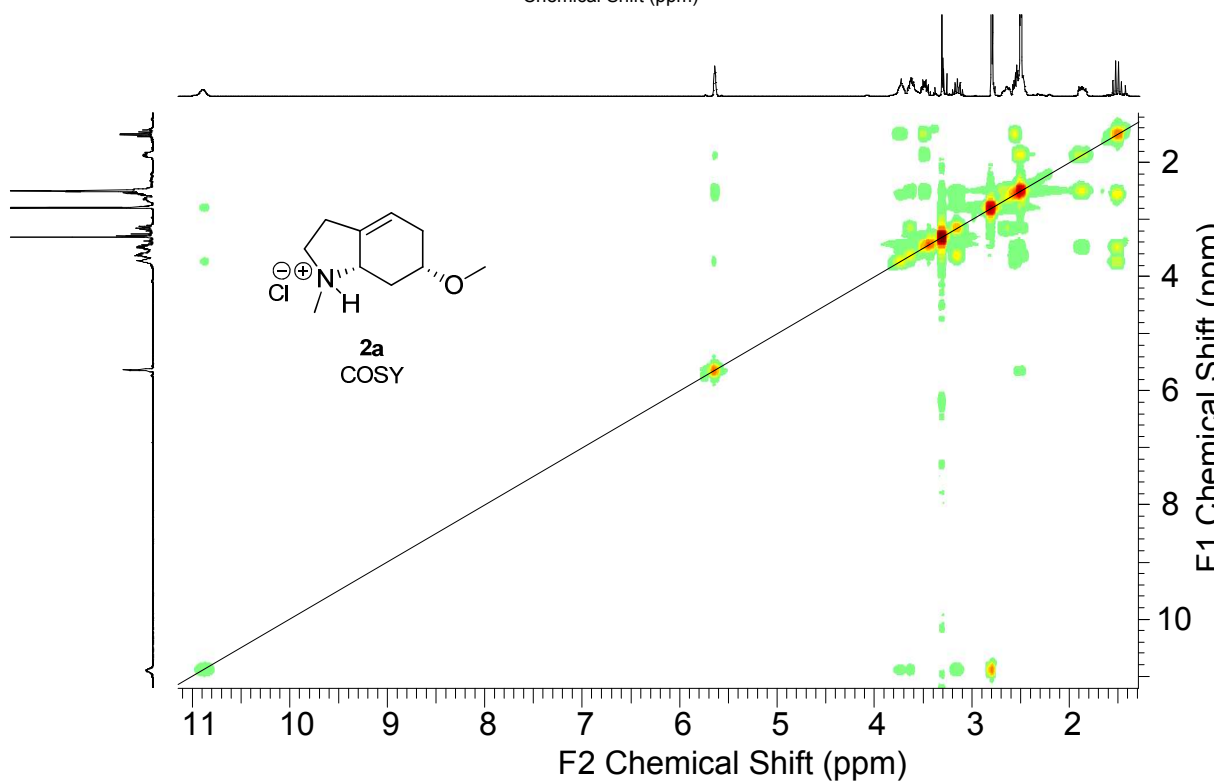

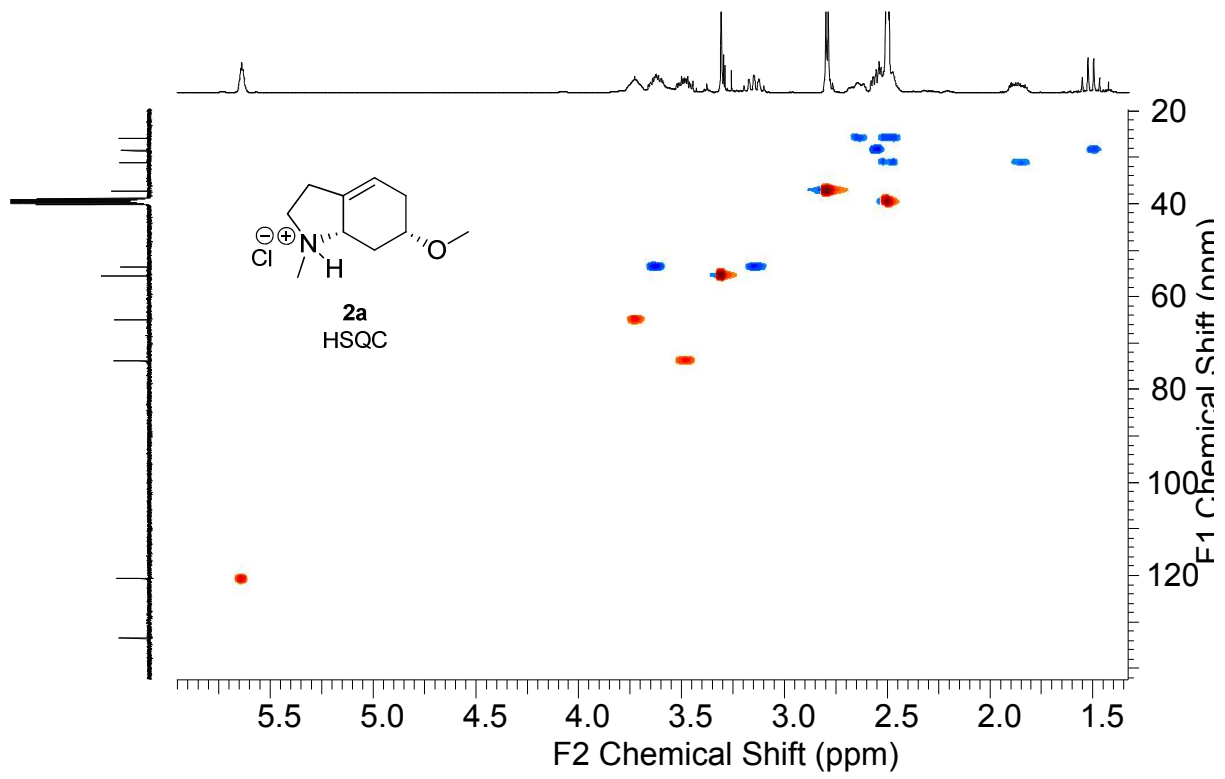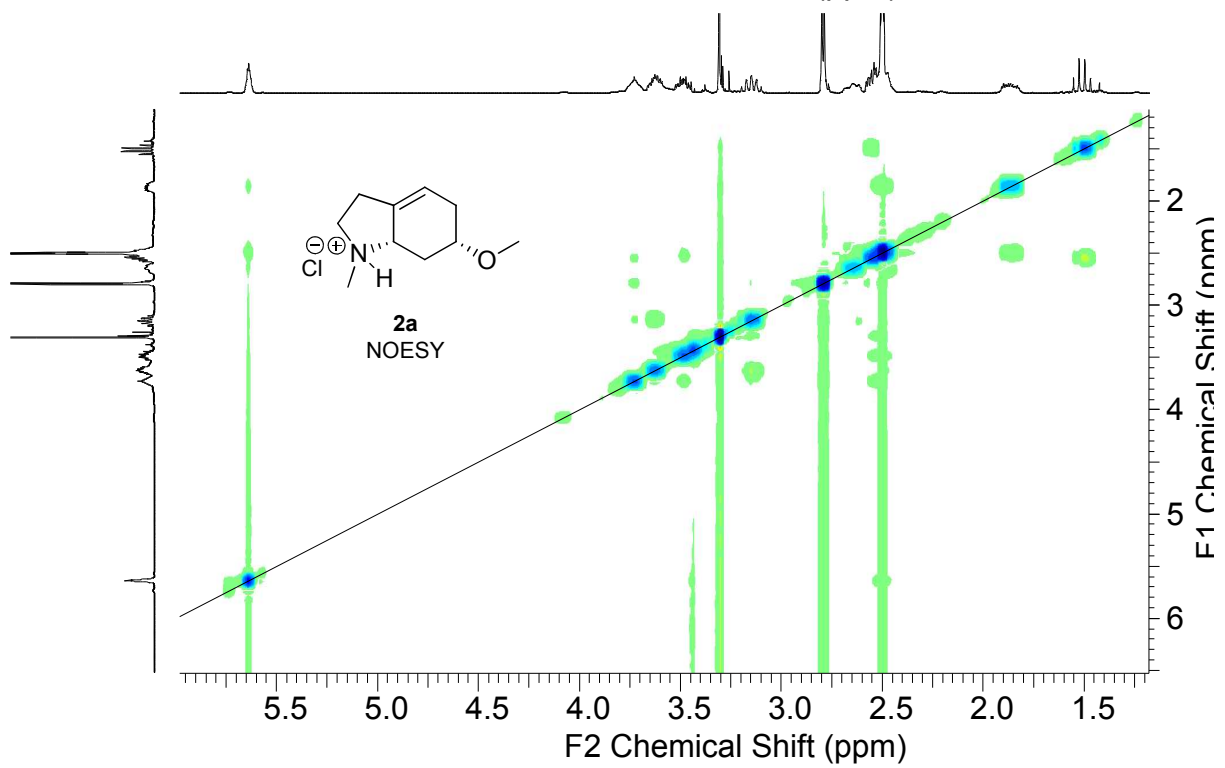



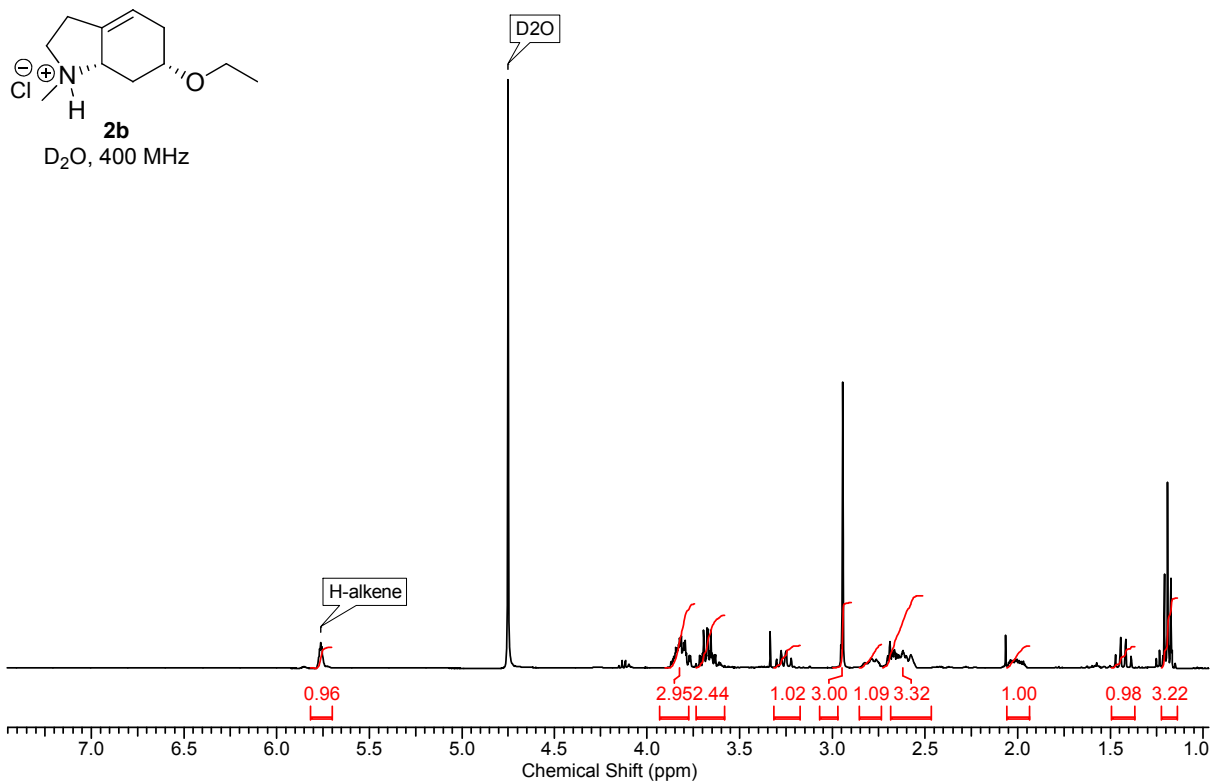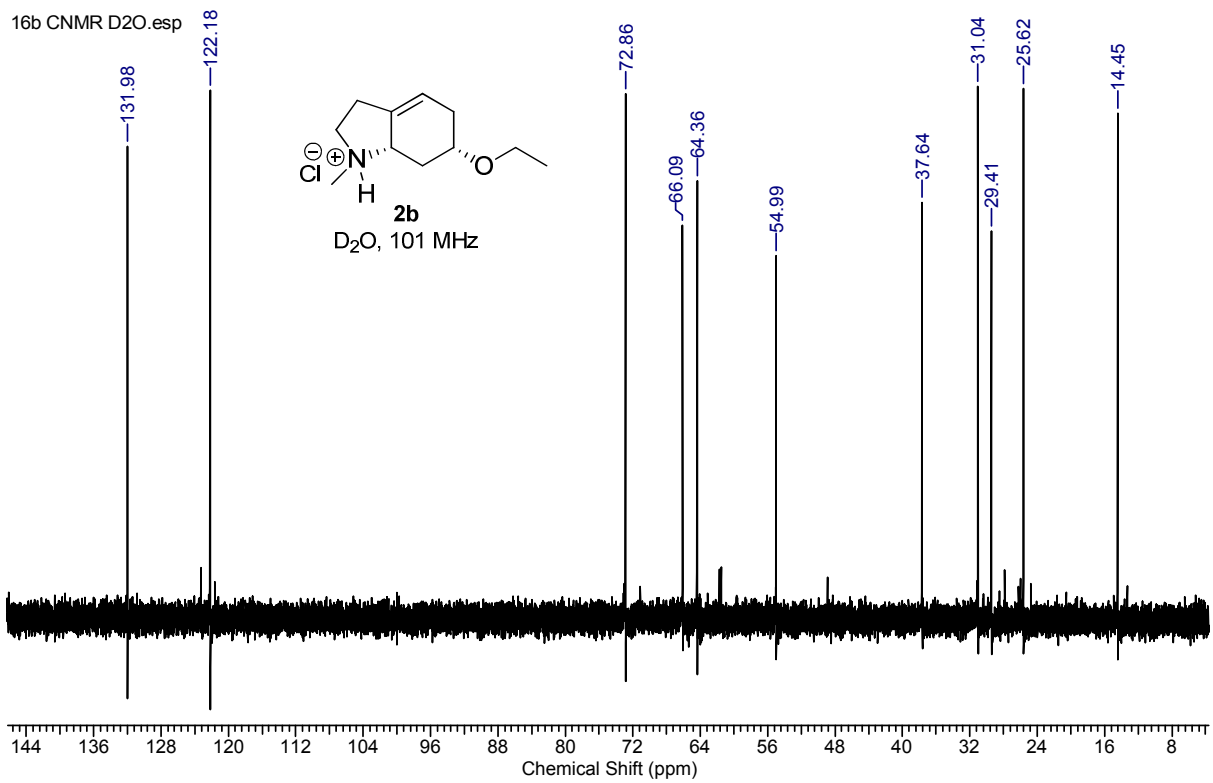

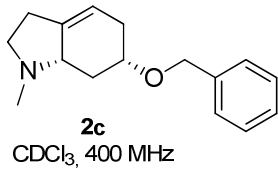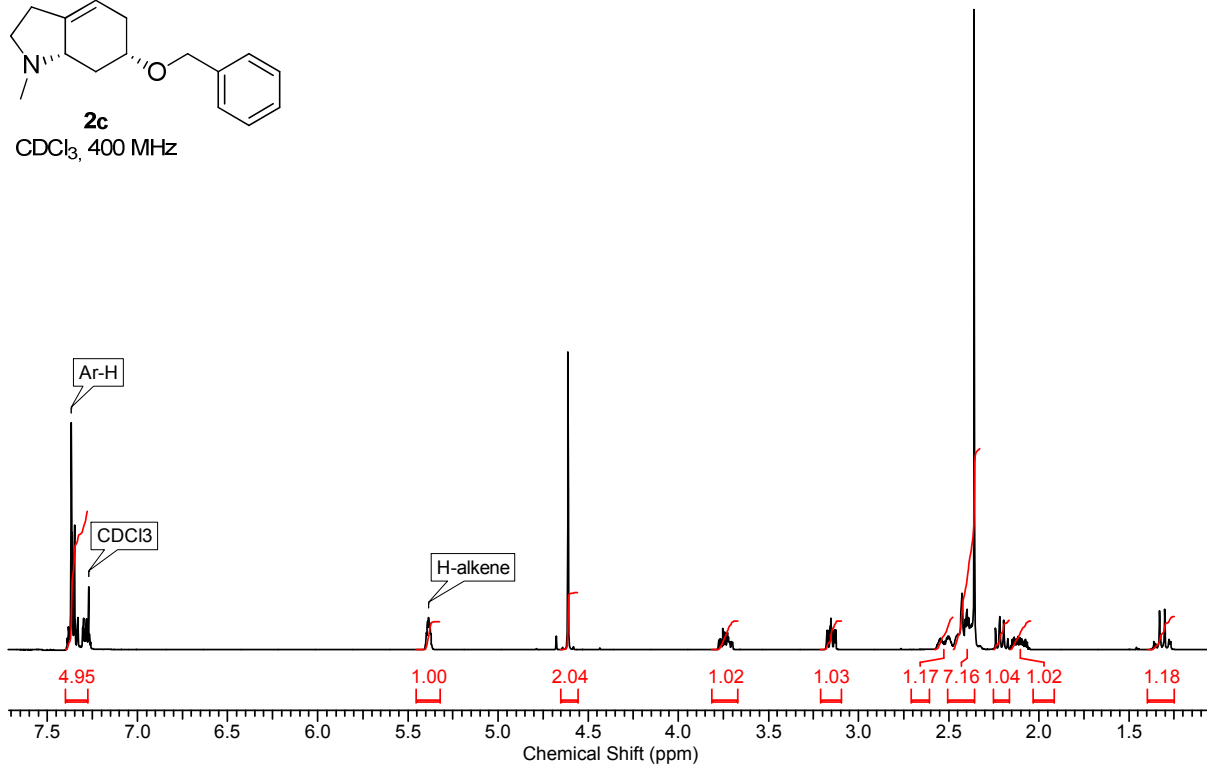

16c CNMR.esp

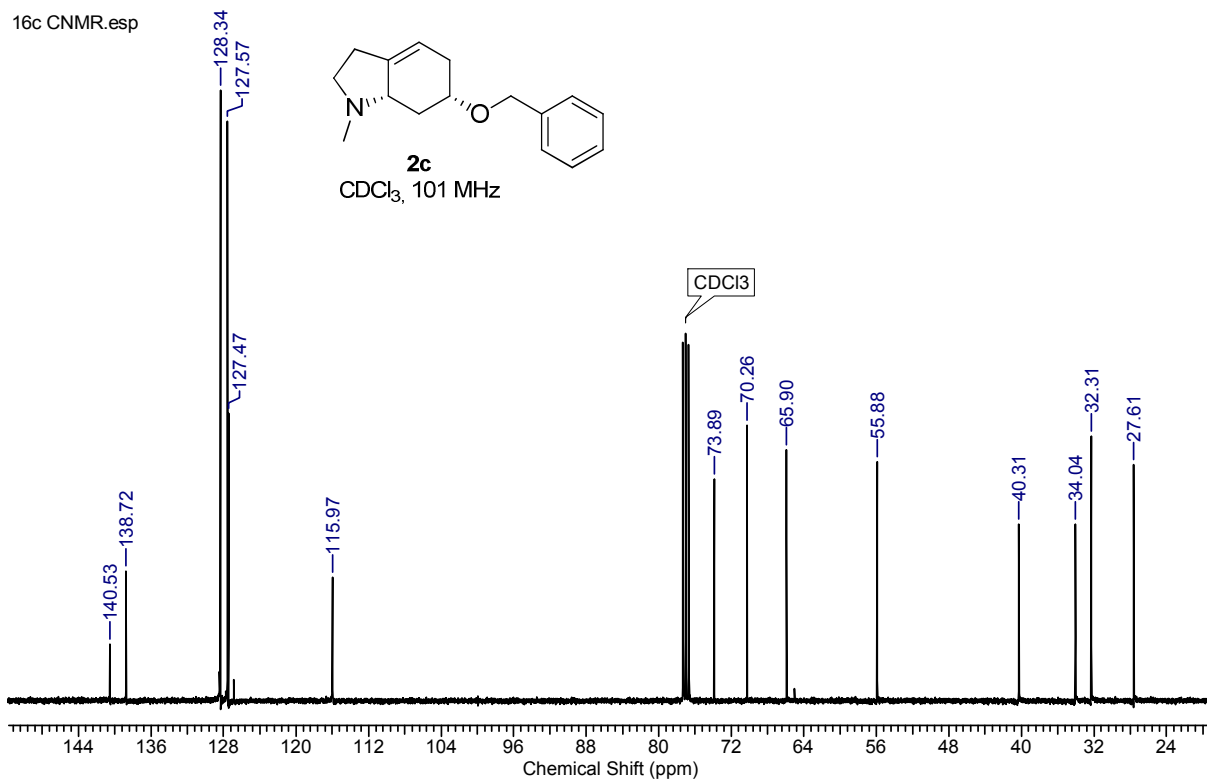

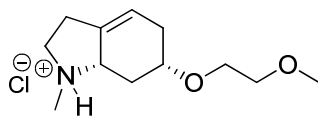

**2d**  
D<sub>2</sub>O, 400 MHz

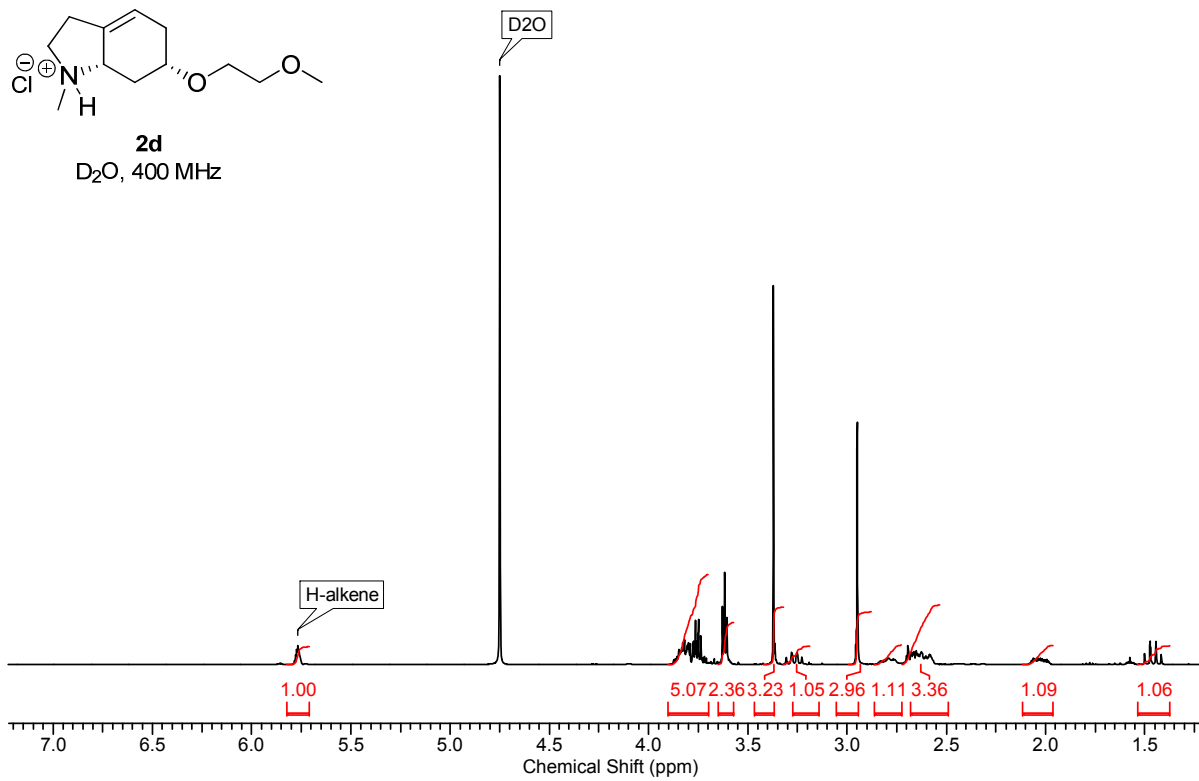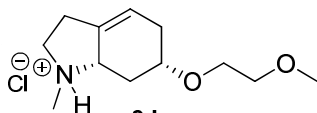

**2d**  
D<sub>2</sub>O, 100 MHz

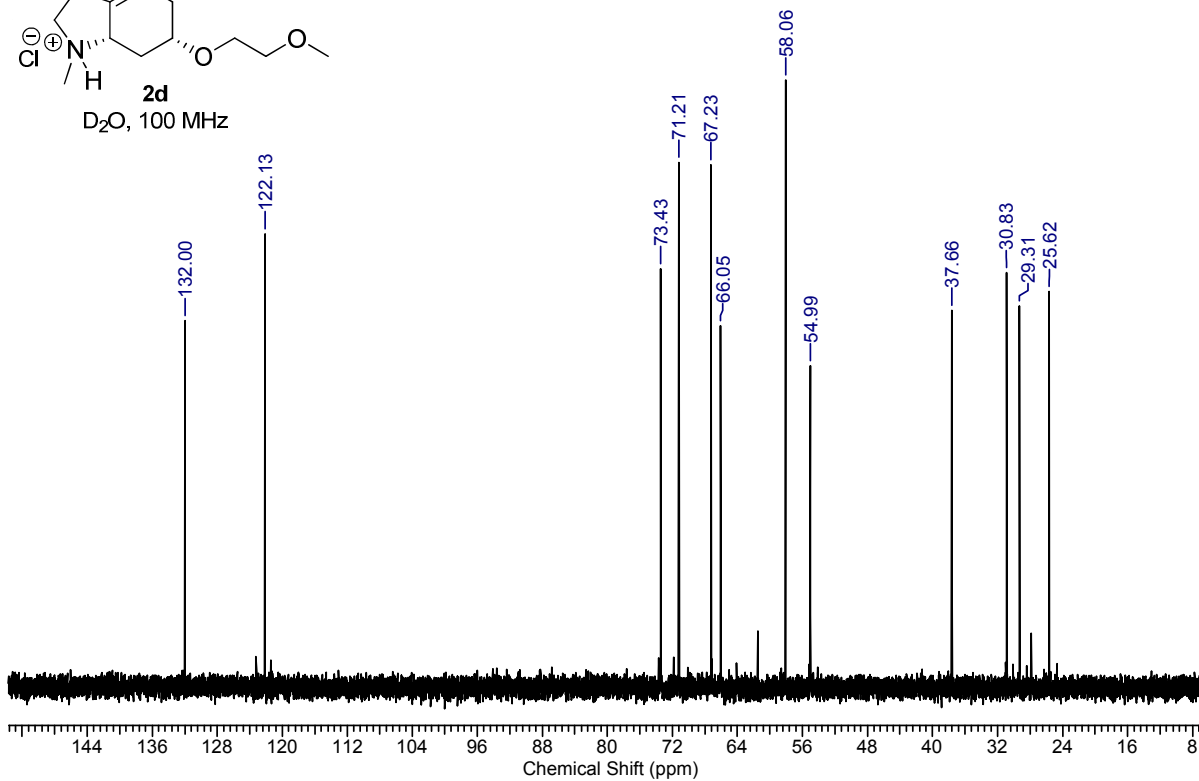



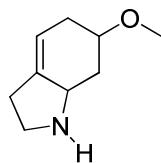

**15**  
MeOD, 400 MHz

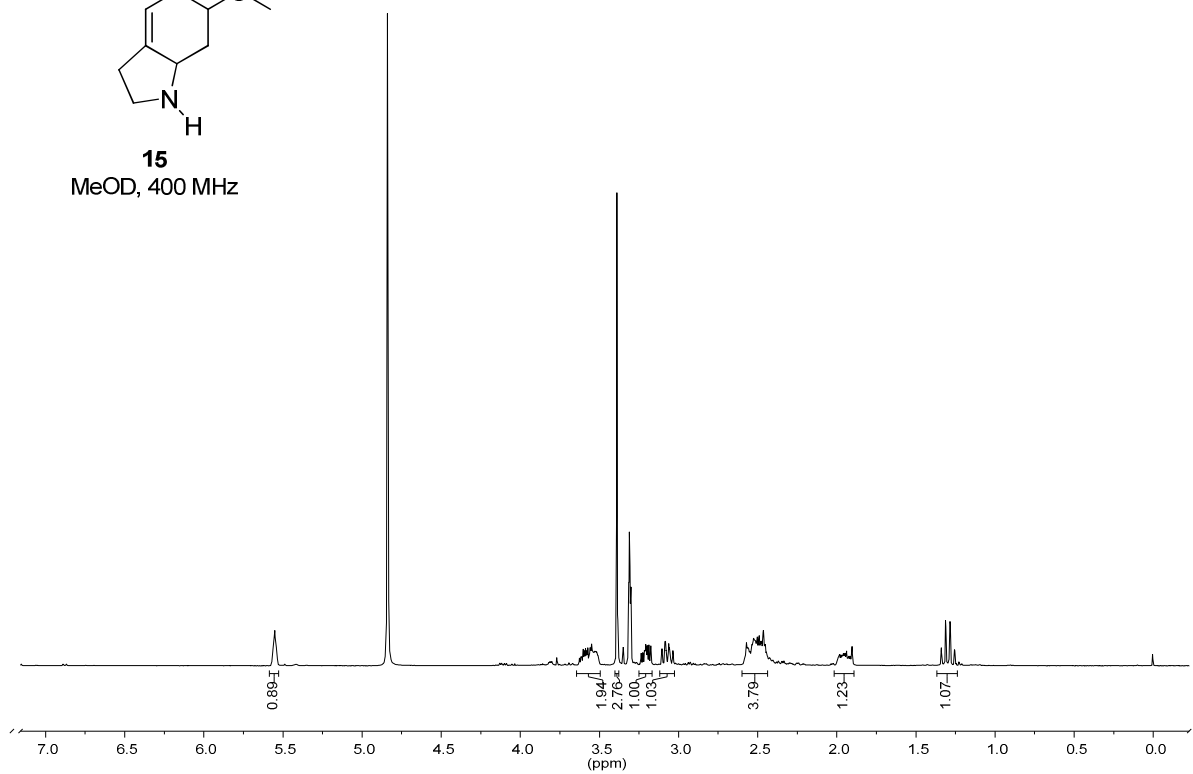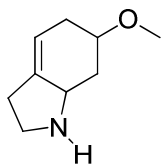

**15**  
MeOD, 101 MHz

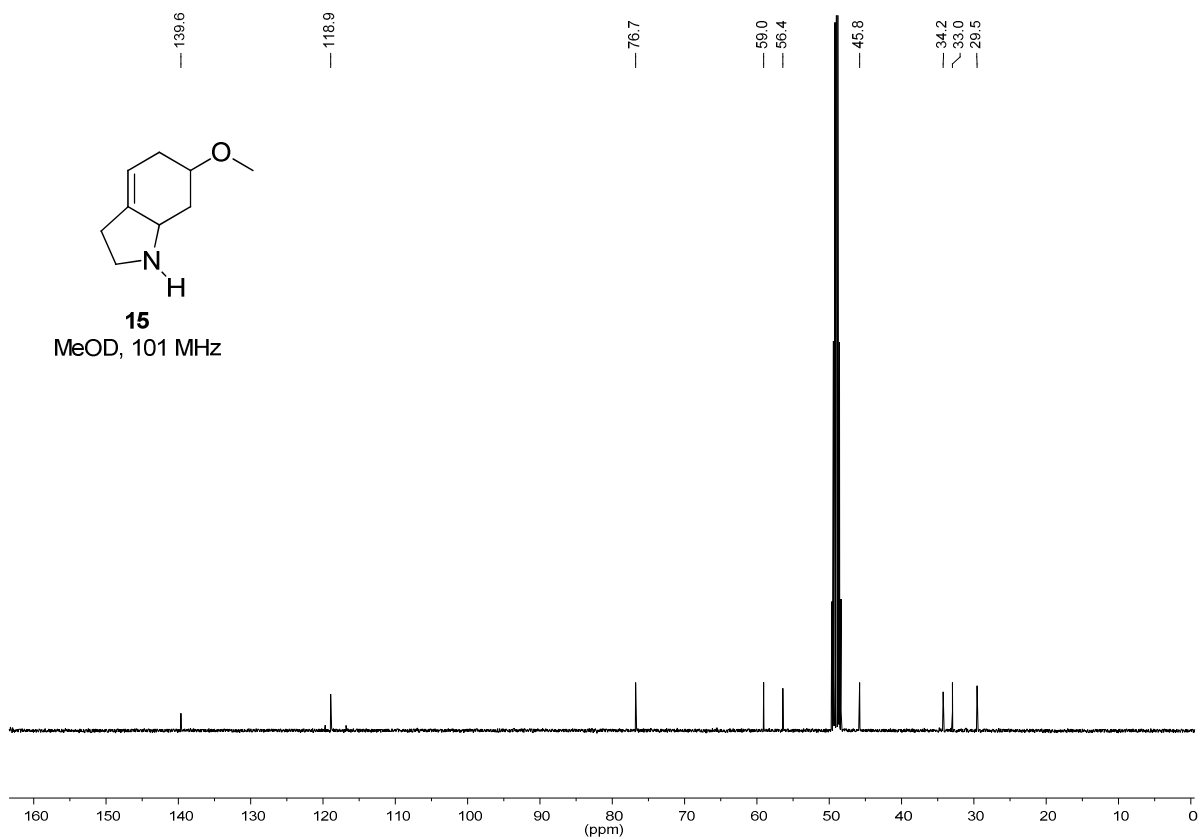

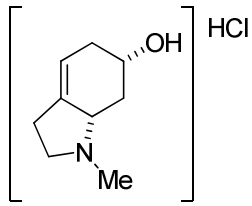

**16**  
 MeOD, 400 MHz

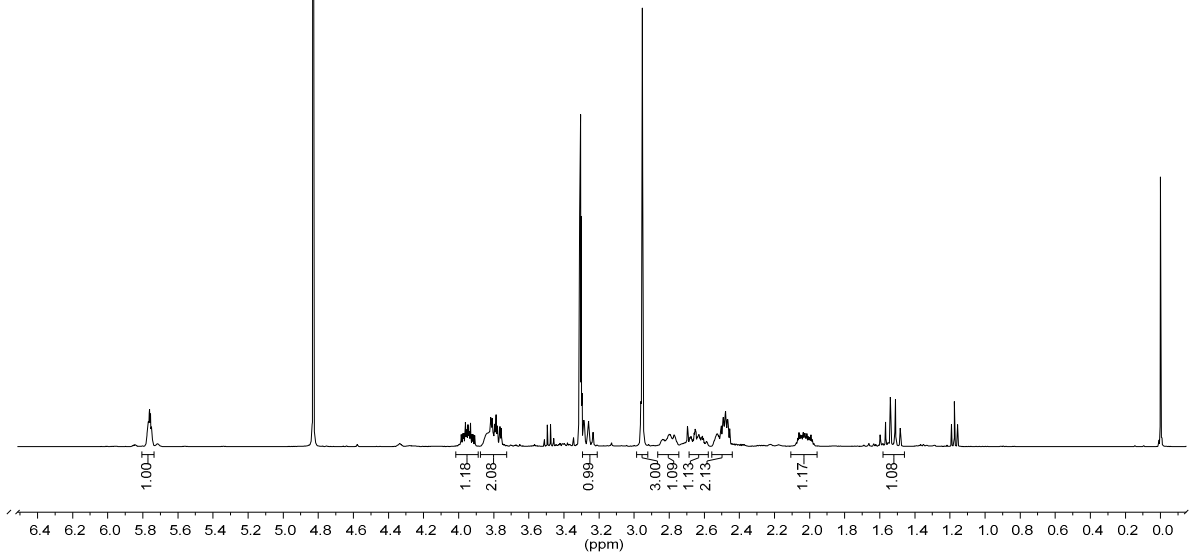

— 133.7  
 — 124.0

— 67.6  
 — 66.2  
 — 56.1

— 38.4  
 — 35.1  
 — 34.1  
 — 27.0

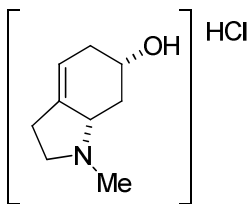

**16**  
 MeOD, 101 MHz

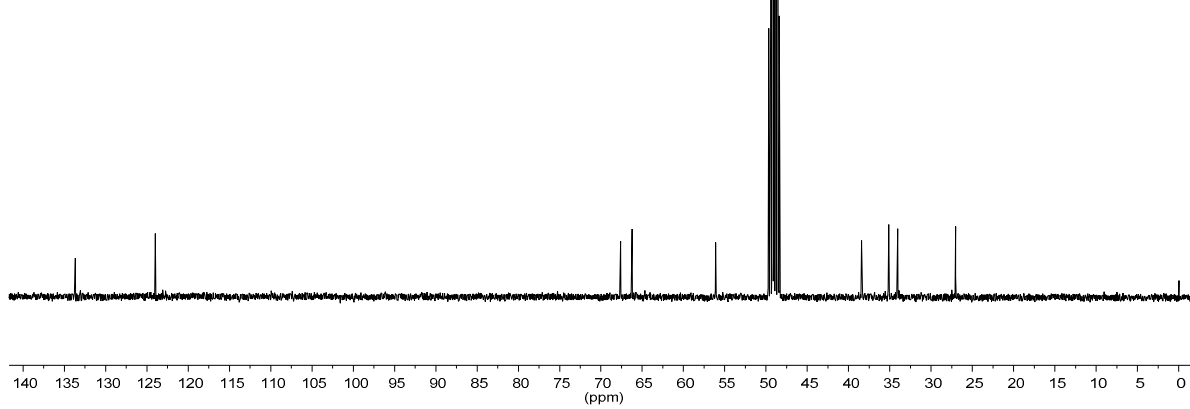

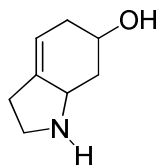

**17**  
MeOD, 400 MHz

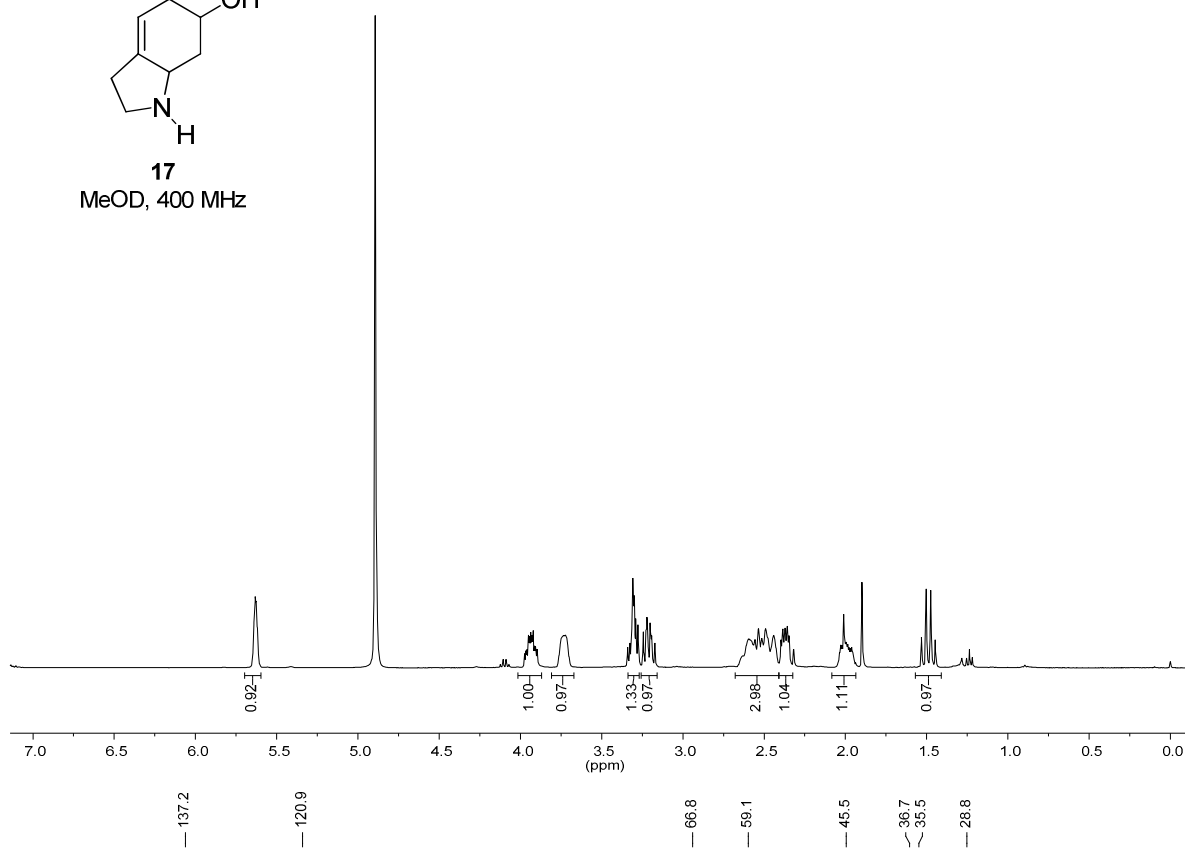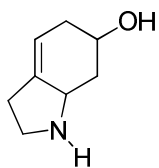

**17**  
MeOD, 101 MHz

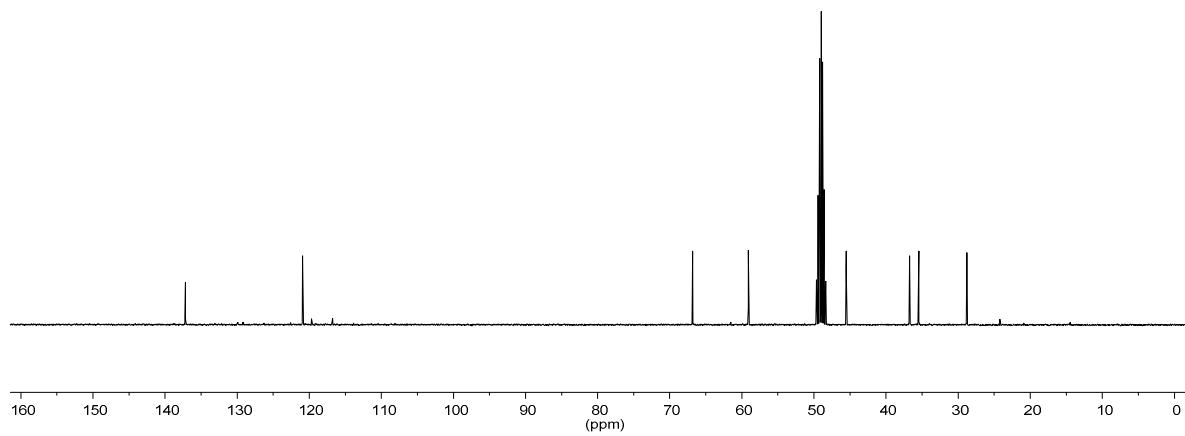

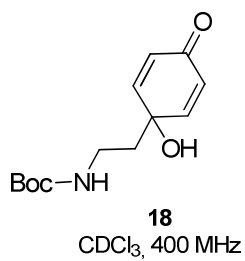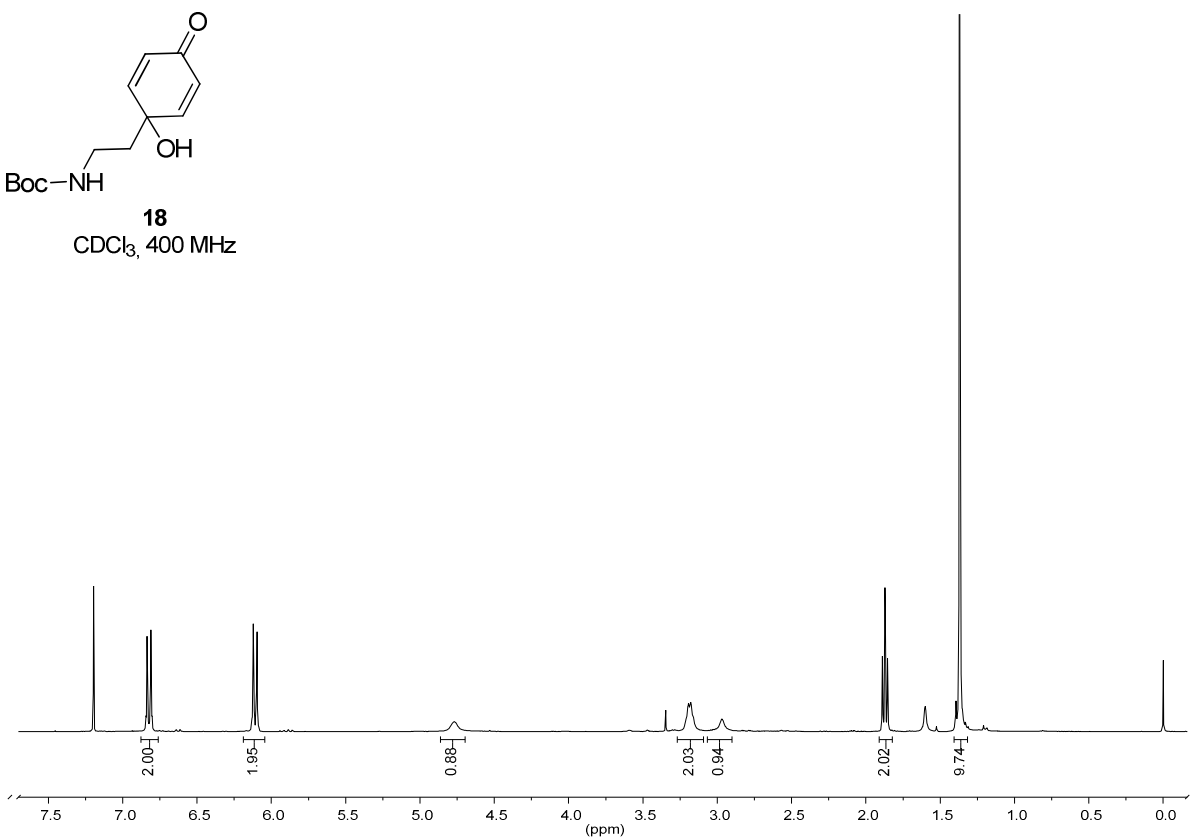

185.2 156.2 150.5 128.1 79.9 68.9 40.4 40.4 36.1 28.4 28.4

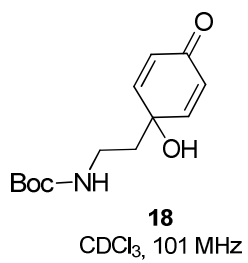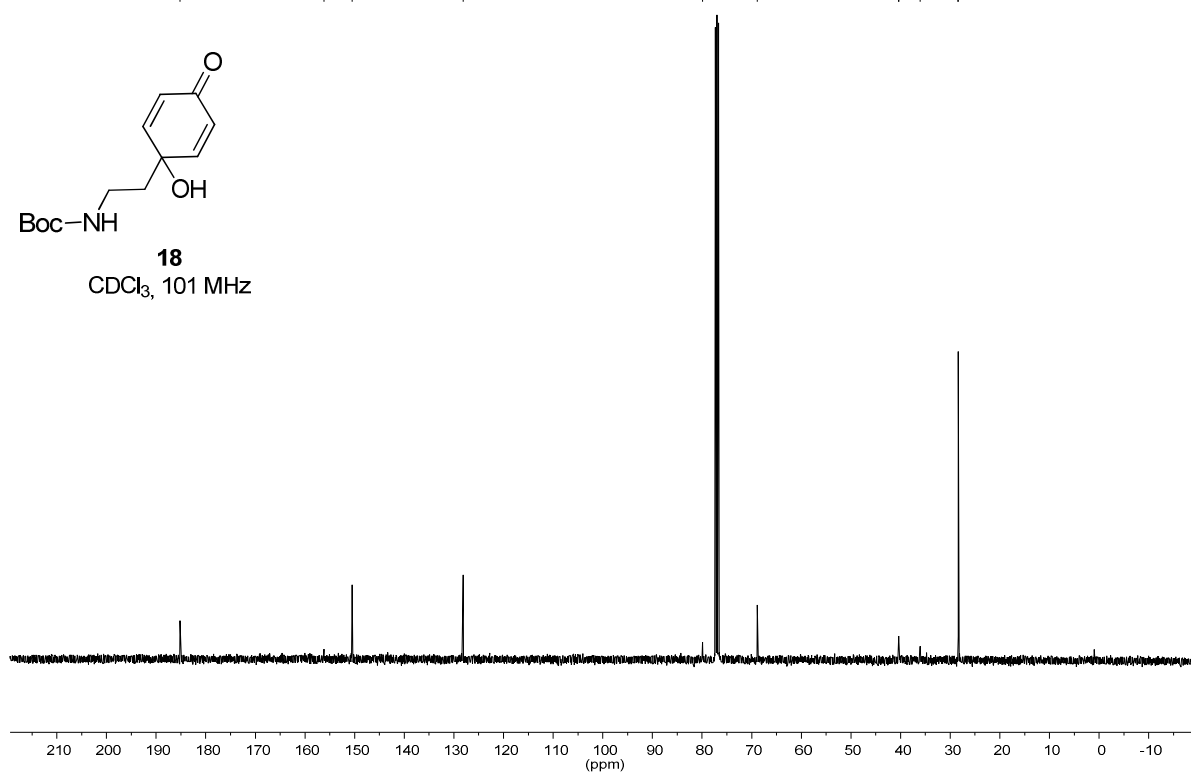



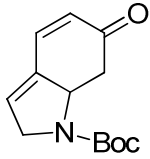

**20**  
CDCl<sub>3</sub>, 400 MHz

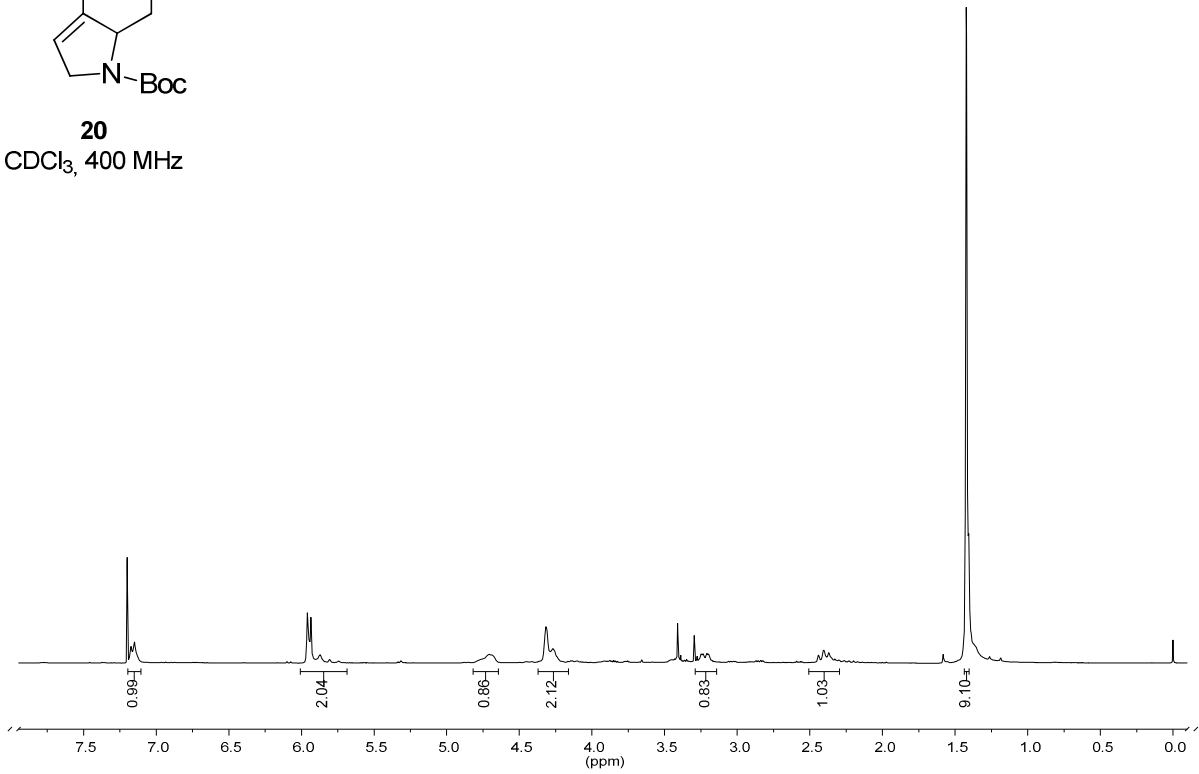

— 197.6

— 154.4

— 138.5

— 135.6

— 129.6

— 125.3

— 80.6

— 77.3

— 61.4

— 55.5

— 46.1

— 28.5

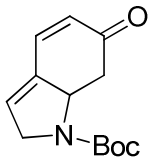

**20**  
CDCl<sub>3</sub>, 101 MHz

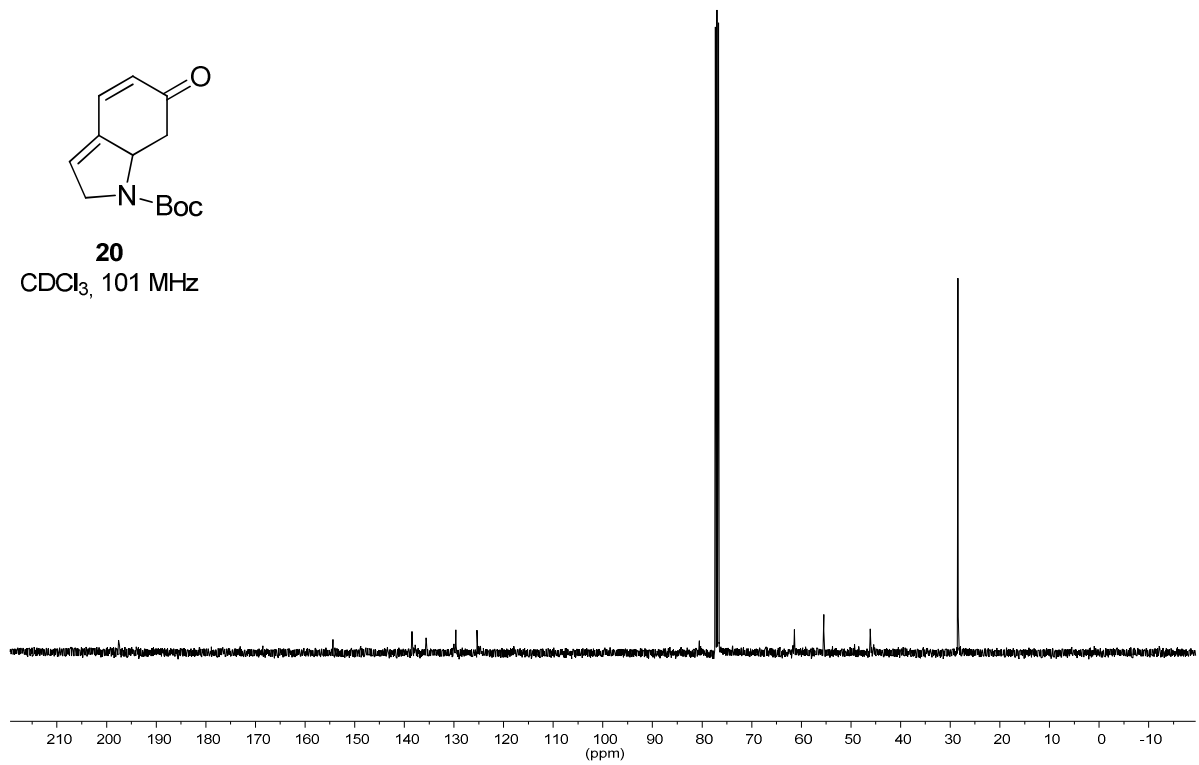

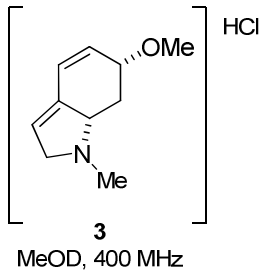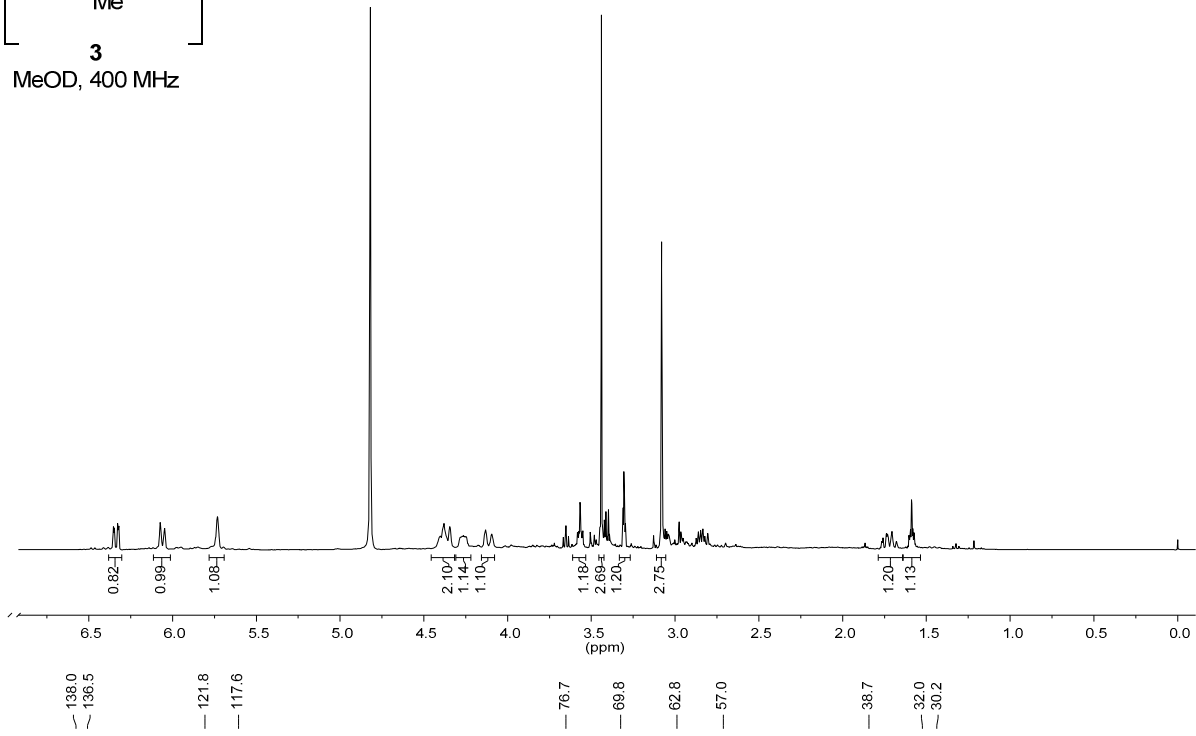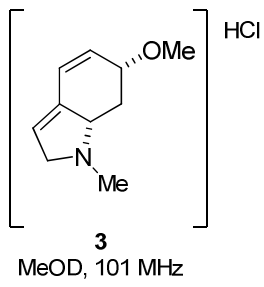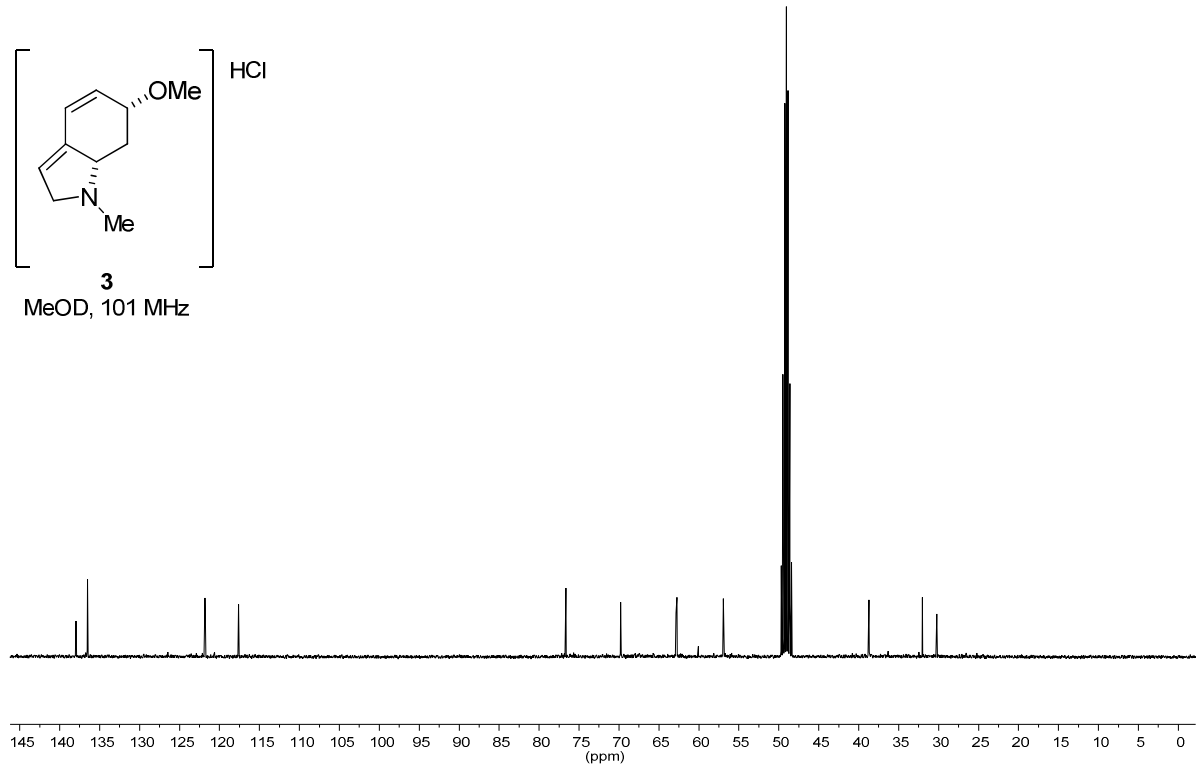

Supplement: ml500094c_si_001.pdf [file ml500094c_si_001.pdf]
